# Supplementary material
Source: publisher figshare collection journal article supplement (https://acs.figshare.com/ndownloader/files/16754864)
Supplement: Supplementary file 1 [file 16754864]

## Sheet: Cover
Supporting Information
Proteomic Analysis of Restored Insulin Production and Trafficking in Obese Diabetic Mouse Pancreatic Islets Following Euglycemia
Taewook Kang1,2,¶, Brandon B. Boland3,4,5,¶, Cristina Alarcon3, Joseph S. Grimsby4, Christopher J. Rhodes3,4 and Martin R. Larsen1*
1Protein research group, Department of Biochemistry and Molecular Biology, University of Southern Denmark, DK-5230 Odense M, Denmark.
2The Danish Diabetes Academy, Odense, Denmark.
3The Kovler Diabetes Center, Department of Medicine Section of Endocrinology, Diabetes & Metabolism, University of Chicago, Chicago, IL 60637, USA.
4Cardiovascular, Renal and Metabolic Disease Research, MedImmune LLC, Gaithersburg, MD 20878, USA.
5Present address: Gubra, DK-2970 Hørsholm, Denmark
¶These authors made an equal contribution to this study.
*Corresponding author: Prof. Dr. Martin R. Larsen:
Department of Biochemistry and Molecular Biology, the University of Southern Denmark, Denmark. Tel.: 45-60-111872; E-mail: mrl@bmb.sdu.dk; ORCID: 0000-0001-6203-0123
S-1. The list of recovered proteins.
S-2. The list of recovered phosphopeptides.

## Sheet: S-1
S-1. The list of recovered proteins.
			Average of Ratio				Average of relative percentages
Accession no.	Common name	Gene symbols	NG/N	DG/D	D/N	DG/NG	Normal	Normal+G	db/db	db/db+G
E9Q9H2	DnaJ homolog subfamily C member 2	Dnajc2	0.823659	-3.09094	3.87026	-0.0443387	0.278315	0.585167	0.879923	0.559693
Q08024	Core-binding factor subunit beta (CBF-beta) (Polyomavirus enhancer-binding protein 2 beta subunit) (PEA2-beta) (PEBP2-beta) (SL3-3 enhancer factor 1 subunit beta) (SL3/AKV core-binding factor beta subunit)	Cbfb Pebp2b Pebpb2	0.867004	-1.1401	3.49454	1.48744	0.172199	0.201587	1	0.457961
E9QNW4	Piezo-type mechanosensitive ion channel component	Piezo2 Fam38b	0.404469	-1.32775	3.06218	1.32996	0.182239	0.244828	1	0.427267
B2RQY6	BC035947 protein (Protein BC035947)	BC035947	0.0551539	-0.836244	2.97493	2.08353	0.145474	0.147568	1	0.592902
G3UYE4	Huntingtin-associated protein 1 (Fragment)	Hap1	0.224123	-0.946073	2.5373	1.36711	0.297788	0.29687	1	0.543906
Q9JHW9	Aldehyde dehydrogenase family 1 member A3 (EC 1.2.1.5) (Aldehyde dehydrogenase 6) (Retinaldehyde dehydrogenase 3) (RALDH-3) (RalDH3)	Aldh1a3 Aldh6 Raldh3	0.0783745	-0.762254	2.53026	1.68963	0.183962	0.192913	1	0.610585
D6RI64	Protein 1110004F10Rik	1110004F10Rik	-0.14662	-1.29278	2.36163	1.21547	0.197149	0.188567	1	0.438205
E9Q1T1	Calcium/calmodulin-dependent protein kinase type II subunit delta	Camk2d	0.66634	-0.583049	2.06985	0.820461	0.292734	0.449271	0.962625	0.652832
Q8BGF8	Solute carrier family 35 member D3 (Fringe connection-like protein 1)	Slc35d3 Frcl1	0.678807	-0.46339	2.02937	0.887169	0.32196	0.426664	0.939943	0.706338
Q91XA2	Golgi membrane protein 1 (Golgi membrane protein GP73) (Golgi phosphoprotein 2)	Golm1 Golph2	0.134436	-0.662533	1.98706	1.19009	0.269402	0.291426	1	0.633699
P28651	Carbonic anhydrase-related protein (CARP) (Carbonic anhydrase VIII) (CA-VIII)	Ca8 Cals Cals1 Car8 Carp	-0.0566416	-0.513498	1.93648	1.47962	0.270644	0.264176	1	0.703663
Q64444	Carbonic anhydrase 4 (EC 4.2.1.1) (Carbonate dehydratase IV) (Carbonic anhydrase IV) (CA-IV)	Ca4 Car4	-0.18679	-0.512921	1.87977	1.55363	0.277054	0.264419	1	0.760152
Q8C8U0	Liprin-beta-1 (Protein tyrosine phosphatase receptor type f polypeptide-interacting protein-binding protein 1) (PTPRF-interacting protein-binding protein 1)	Ppfibp1 Kiaa1230	0.158096	-0.615129	1.86511	1.09188	0.28069	0.308847	1	0.66244
Q6AXE3	ATP-binding cassette sub-family A member 3 (Abca3 protein)	Abca3	0.324204	-0.607681	1.82792	0.896037	0.299731	0.353589	1	0.669005
Q8R5K4	Nucleolar protein 6 (Nucleolar RNA-associated protein) (Nrap)	Nol6	0.222921	-0.318684	1.78142	1.23981	0.302335	0.380101	1	0.804525
Q9EPR5	VPS10 domain-containing receptor SorCS2	Sorcs2	-0.274596	-0.746409	1.72353	1.25172	0.320187	0.267636	1	0.631498
Q9CYA0	Cysteine-rich with EGF-like domain protein 2	Creld2	0.145391	-0.482899	1.70314	1.07485	0.336043	0.374209	1	0.72328
P15920	V-type proton ATPase 116 kDa subunit a isoform 2 (V-ATPase 116 kDa isoform a2) (Immune suppressor factor J6B7) (ISF) (Lysosomal H(+)-transporting ATPase V0 subunit a2) (ShIF) (Vacuolar proton translocating ATPase 116 kDa subunit a isoform 2)	Atp6v0a2 Atp6n1b Tj6	0.0144859	-0.478536	1.65852	1.1655	0.323662	0.342865	1	0.768327
F6QCP8	Angiotensin-converting enzyme (Fragment)	Ace	0.0742524	-0.331428	1.64051	1.23483	0.33825	0.354235	1	0.797745
E0CY01	Extracellular serine/threonine protein kinase FAM20C	Fam20c	-0.722342	-0.432849	1.63553	1.92502	0.335064	0.241685	1	0.749937
G3UWP3	Aldehyde dehydrogenase family 1 member A3 (Fragment)	Aldh1a3	0.025945	-0.32851	1.61194	1.25749	0.326812	0.35179	0.989263	0.807912
H3BKK0	Delta-1-pyrroline-5-carboxylate synthase (Fragment)	Aldh18a1	0.369493	-0.376841	1.59231	0.84598	0.346038	0.441418	1	0.792161
Q9ESG4	Collectrin (Transmembrane protein 27)	Tmem27 Nx17	0.165546	-0.752408	1.58932	0.67137	0.375366	0.415993	1	0.600502
Q91W45	Polyadenylate-binding protein-interacting protein 2B (PABP-interacting protein 2B) (PAIP-2B) (Poly(A)-binding protein-interacting protein 2B)	Paip2b Kiaa1155	-0.346535	-1.22136	1.56734	0.692521	0.342071	0.271814	1	0.468889
E9Q4N6	Protein Arid1b	Arid1b	0.360999	-0.675503	1.55532	0.518819	0.35398	0.437807	1	0.668528
D3YUS2	Protein 6430548M08Rik (Fragment)	6430548M08Rik	-0.0144336	-0.599114	1.54179	0.95711	0.367282	0.378777	1	0.689618
F8WGL9	Protein CDV3	Cdv3	0.335848	-0.425967	1.5387	0.776882	0.328154	0.451769	0.921639	0.739235
Q6NWW9	Fibronectin type III domain-containing protein 3B (Factor for adipocyte differentiation 104) (HCV NS5A-binding protein 37)	Fndc3b Fad104 Kiaa4164 Ns5abp37	0.251342	-0.502719	1.50257	0.748513	0.35782	0.423375	1	0.707537
Q9QXS6	Drebrin (Developmentally-regulated brain protein)	Dbn1 Drba	0.241143	-0.740363	1.49337	0.511862	0.376067	0.430038	1	0.603434
G3X9J8	Prominin 1, isoform CRA_g (Prominin-1)	Prom1 mCG_124143	-0.110211	-0.621072	1.49028	0.97942	0.364879	0.3419	1	0.661987
D3Z5S8	MCG11933 (Protein Fam46a)	Fam46a mCG_11933	-0.049523	-0.542173	1.4802	0.987546	0.381999	0.368321	1	0.722819
E9Q390	Myoferlin	Myof	0.269771	-0.31329	1.47806	0.894995	0.349723	0.423483	0.970253	0.797273
Q80U04	E3 ubiquitin-protein ligase Praja-2 (Praja2) (EC 6.3.2.-) (RING finger protein 131)	Pja2 Kiaa0438 Rnf131	0.228487	-0.648931	1.47793	0.600517	0.374324	0.444617	1	0.700988
Q91W86	Vacuolar protein sorting-associated protein 11 homolog	Vps11	0.27357	-0.485276	1.47267	0.713824	0.385172	0.450835	1	0.726552
Q8VCA8	Secernin-2	Scrn2	-0.530544	-0.361043	1.46418	1.63368	0.366992	0.279928	1	0.806406
E0CYE5	Vesicle transport through interaction with t-SNAREs homolog 1B	Vti1b	0.509186	-0.48021	1.45851	0.469117	0.370942	0.541577	1	0.746824
F7BP94	Protein asunder homolog (Fragment)	Asun Spata30	0.09744	-0.717606	1.41925	0.604203	0.390752	0.418733	1	0.64215
D3Z569	Signal peptidase complex catalytic subunit SEC11 (EC 3.4.21.89)	Sec11a Sec11l1 mCG_15305	0.348893	-0.408165	1.41535	0.658296	0.379078	0.486204	1	0.795933
Q80Y98	Phospholipase DDHD2 (EC 3.1.1.-) (DDHD domain-containing protein 2) (SAM, WWE and DDHD domain-containing protein 1)	Ddhd2 Kiaa0725 Samwd1	0.154252	-0.547012	1.41425	0.712987	0.392187	0.427496	1	0.693646
D3YWH4	Transmembrane 9 superfamily member 1 (Fragment)	Tm9sf1	0.0212288	-0.378467	1.40666	1.00697	0.383932	0.382562	0.997572	0.794621
G3UXT8	Large proline-rich protein BAG6 (Fragment)	Bag6	0.46352	-0.545638	1.36013	0.350974	0.395756	0.56101	1	0.733157
Q9ER67	Maged2 protein (Protein Maged2)	Maged2	0.190474	-0.477584	1.35638	0.68832	0.401102	0.448903	1	0.735092
Q8BI84	Melanoma inhibitory activity protein 3 (Transport and Golgi organization protein 1)	Mia3 Kiaa0268 Tango1	0.19885	-0.720862	1.35312	0.433404	0.416333	0.478217	1	0.623933
D3YYB0	40S ribosomal protein S27	Rps27l mCG_1230	0.202531	-0.331356	1.34262	0.808737	0.400249	0.466222	1	0.807512
D3Z1R1	Heat shock protein HSP 90-beta (Fragment)	Hsp90ab1	0.140814	-0.495289	1.34195	0.705845	0.409805	0.448418	1	0.739243
P58501	PAX3- and PAX7-binding protein 1 (PAX3/7BP) (GC-rich sequence DNA-binding factor 1)	Paxbp1 Gcfc Gcfc1	0.218872	-0.581018	1.33607	0.536176	0.3981	0.485945	1	0.762488
E9Q5W5	Zinc finger ZZ-type and EF-hand domain-containing protein 1	Zzef1	0.146909	-0.475839	1.33284	0.710095	0.40036	0.439574	1	0.760932
Q8K2J4	Coiled-coil domain-containing protein 14	Ccdc14	0.516115	-0.826608	1.32863	-0.0140954	0.400745	0.619438	1	0.647494
H3BLM8	Prostaglandin E synthase 2 (Fragment)	Gbf1	0.178183	-0.505934	1.32234	0.638222	0.40247	0.4546	1	0.710095
F6WIU1	Protein KRI1 homolog (cDNA sequence BC021438)	Kri1 BC021438 mCG_14028	0.0468174	-0.549292	1.32227	0.726164	0.400496	0.421187	1	0.70402
Q91XI1	tRNA-dihydrouridine(47) synthase [NAD(P)(+)]-like (EC 1.3.1.-) (tRNA-dihydrouridine synthase 3-like)	Dus3l	0.302191	-0.449851	1.31954	0.567495	0.413244	0.49796	1	0.745645
Q64253	Lymphocyte antigen 6E (Ly-6E) (Stem cell antigen 2) (Thymic shared antigen 1) (TSA-1)	Ly6e Ly67 Sca-2 Tsa-1	0.154491	-0.388326	1.31118	0.768361	0.414074	0.451753	1	0.771403
F6Q3K8	Mannose-6-phosphate isomerase (Fragment)	Mpi	-0.17016	-0.379712	1.29899	1.08944	0.407827	0.358485	0.985503	0.79232
Q5F2E7	Nuclear fragile X mental retardation-interacting protein 2 (82 kDa FMRP-interacting protein) (82-FIP) (FMRP-interacting protein 2)	Nufip2 Kiaa1321	0.400155	-0.499039	1.29751	0.398316	0.430671	0.559644	1	0.730229
P45700	Mannosyl-oligosaccharide 1,2-alpha-mannosidase IA (EC 3.2.1.113) (Man(9)-alpha-mannosidase) (Man9-mannosidase) (Mannosidase alpha class 1A member 1) (Processing alpha-1,2-mannosidase IA) (Alpha-1,2-mannosidase IA)	Man1a1 Man1a	0.0849213	-0.334487	1.29305	0.873639	0.445802	0.4633	1	0.801724
Q9D6V8	Polyadenylate-binding protein-interacting protein 2 (PABP-interacting protein 2) (PAIP-2) (Poly(A)-binding protein-interacting protein 2)	Paip2	0.171715	-0.307465	1.28774	0.808565	0.411927	0.463123	1	0.808792
Q8BGE6	Cysteine protease ATG4B (EC 3.4.22.-) (AUT-like 1 cysteine endopeptidase) (Autophagin-1) (Autophagy-related cysteine endopeptidase 1) (Autophagy-related protein 4 homolog B)	Atg4b Apg4b Autl1 Kiaa0943	-0.166659	-0.479172	1.26307	0.950555	0.416978	0.373169	1	0.7829
A2ASS3	Phosphatidylinositol 5-phosphate 4-kinase type-2 alpha (Fragment)	Pip4k2a	0.598639	-0.571658	1.25443	0.0841336	0.426823	0.699461	1	0.70313
D3YYM7	Putative adenosylhomocysteinase 3 (Fragment)	Ahcyl2	-0.379653	-0.603671	1.24427	1.02025	0.444733	0.367271	1	0.673473
E9Q0P9	Serpin B6 (Fragment)	Serpinb6a	0.154354	-0.597385	1.23902	0.48728	0.455652	0.48118	1	0.669599
Q80W22	Threonine synthase-like 2 (TSH2) (mTSH2) (EC 4.2.3.-)	Thnsl2	0.207659	-0.345018	1.21677	0.664095	0.430693	0.504583	0.984365	0.821774
Q6WVG3	BTB/POZ domain-containing protein KCTD12 (Pfetin) (Predominantly fetal expressed T1 domain)	Kctd12 Pfet1	0.04565	-0.400826	1.21473	0.768251	0.43588	0.452446	1	0.775758
D3YVU1	Ubiquitinyl hydrolase 1 (EC 3.4.19.12)	Usp16	0.385366	-0.568626	1.20946	0.255465	0.437584	0.584235	1	0.712058
F6ST32	Carbonic anhydrase 4 (Fragment)	Car4	0.676425	-0.378871	1.19148	0.136181	0.455473	0.728076	0.99464	0.768181
P08228	Superoxide dismutase [Cu-Zn] (EC 1.15.1.1)	Sod1	0.00535009	-0.382621	1.1908	0.802828	0.447174	0.45499	1	0.776479
Q7TQ95	Protein lunapark (Protein ulnaless)	Lnp Kiaa1715 Uln	0.589659	-0.644362	1.18911	-0.0449078	0.438917	0.665028	1	0.651077
D3YYZ2	MCG1031578 (Uncharacterized protein)	Gm5239 mCG_1031578	0.18598	-0.326562	1.1812	0.668656	0.444745	0.507564	1	0.80745
O70589	Peripheral plasma membrane protein CASK (EC 2.7.11.1) (Calcium/calmodulin-dependent serine protein kinase)	Cask	-0.436762	-0.450268	1.16924	1.15573	0.456273	0.33232	0.996453	0.767505
Q9WUH1	Transmembrane protein 115 (Protein PL6 homolog)	Tmem115 Pl6	0.226891	-0.356709	1.1604	0.576804	0.445671	0.524606	0.989437	0.806338
Q91XD7	Cysteine-rich with EGF-like domain protein 1	Creld1	-0.241288	-0.480275	1.14255	0.903559	0.460814	0.386267	1	0.736501
Q9CX33	Elongation factor Ts, mitochondrial (EF-Ts) (EF-TsMt)	Tsfm	-0.296212	-0.476719	1.13879	0.958283	0.457651	0.383204	1	0.741501
Q9CWH6	Proteasome subunit alpha type-7-like (EC 3.4.25.1)	Psma8 Psma7l	-0.079688	-0.417714	1.1386	0.80057	0.46586	0.432772	1	0.757683
Q6IRU5	Clathrin light chain B (Lcb)	Cltb	0.63683	-0.363125	1.13311	0.133151	0.404603	0.666564	0.89936	0.710348
Q6P2L7	Protein CASC4 (Cancer susceptibility candidate gene 4 protein homolog)	Casc4	0.176461	-0.332715	1.13121	0.622038	0.457937	0.520282	0.97605	0.810983
F6WMD1	Alpha-2-macroglobulin receptor-associated protein (Fragment)	Lrpap1	0.261481	-0.632902	1.1303	0.235916	0.479366	0.587542	1	0.670061
P99026	Proteasome subunit beta type-4 (EC 3.4.25.1) (Low molecular mass protein 3) (Macropain beta chain) (Multicatalytic endopeptidase complex beta chain) (Proteasome beta chain) (Proteasome chain 3)	Psmb4 Lmp3	0.0732624	-0.328215	1.12742	0.725939	0.477018	0.500362	1	0.799677
Q4V9Z5	Seizure 6-like protein 2 (Brain-specific receptor-like protein A) (BSRP-A)	Sez6l2	-0.22373	-0.633368	1.11216	0.702523	0.472122	0.424773	1	0.651931
Q9CQ86	Migration and invasion enhancer 1	Mien1 Rdx12	0.327876	-0.373884	1.10807	0.406313	0.470656	0.581099	0.994924	0.790443
O35386	Phytanoyl-CoA dioxygenase, peroxisomal (EC 1.14.11.18) (Lupus nephritis-associated peptide 1) (Phytanic acid oxidase) (Phytanoyl-CoA alpha-hydroxylase) (PhyH)	Phyh Ln1 Lnap1 Pahx	0.396749	-0.570111	1.10349	0.136629	0.470343	0.656267	1	0.707796
F6U415	SWI/SNF-related matrix-associated actin-dependent regulator of chromatin subfamily B member 1 (Fragment)	Smarcb1	0.140999	-0.316808	1.09502	0.637212	0.490896	0.557178	1	0.842642
O09061	Proteasome subunit beta type-1 (EC 3.4.25.1) (Macropain subunit C5) (Multicatalytic endopeptidase complex subunit C5) (Proteasome component C5) (Proteasome gamma chain)	Psmb1	0.197601	-0.322039	1.08738	0.567744	0.472209	0.540482	1	0.809874
A2RSY6	TRMT1-like protein (EC 2.1.1.-)	Trmt1l	-0.14426	-0.416294	1.08712	0.815089	0.471563	0.427993	1	0.77287
E9Q035	Protein Gm20425	Gm20425	-0.375151	-0.75832	1.0859	0.702735	0.485265	0.366163	1	0.600996
Q8K4R4	Cytoplasmic phosphatidylinositol transfer protein 1 (Mammalian rdgB homolog beta) (M-rdgB beta) (MrdgBbeta) (mM-rdgBbeta) (Retinal degeneration B homolog beta) (RdgBbeta)	Pitpnc1	0.282996	-0.379468	1.08587	0.42341	0.45604	0.572673	0.967139	0.787034
H9KV21	E3 ubiquitin-protein ligase ARIH1	Arih1	0.30634	-0.434156	1.08556	0.345065	0.496126	0.604913	0.983114	0.783462
Q6ZWU9	40S ribosomal protein S27	Rps27	0.399663	-0.336047	1.07323	0.337519	0.487527	0.629577	1	0.793874
Q9JHL1	Na(+)/H(+) exchange regulatory cofactor NHE-RF2 (NHERF-2) (NHE3 kinase A regulatory protein E3KARP) (Octs2) (SRY-interacting protein 1) (SIP-1) (Sodium-hydrogen exchanger regulatory factor 2) (Solute carrier family 9 isoform A3 regulatory factor 2) (Tyrosine kinase activator protein 1) (TKA-1)	Slc9a3r2 Nherf2	-0.0320545	-0.616414	1.07111	0.486748	0.482741	0.47192	1	0.657774
Q9R1P0	Proteasome subunit alpha type-4 (EC 3.4.25.1) (Macropain subunit C9) (Multicatalytic endopeptidase complex subunit C9) (Proteasome component C9) (Proteasome subunit L)	Psma4	0.138387	-0.355579	1.06187	0.567903	0.484143	0.53645	1	0.790125
P14094	Sodium/potassium-transporting ATPase subunit beta-1 (Sodium/potassium-dependent ATPase subunit beta-1)	Atp1b1 Atp4b	0.0837461	-0.365605	1.06124	0.611892	0.497712	0.532466	1	0.778294
Q61025	Intraflagellar transport protein 20 homolog (mIFT20)	Ift20	-0.18255	-0.488679	1.04834	0.742211	0.490184	0.431764	1	0.75219
O88502	High affinity cAMP-specific and IBMX-insensitive 3',5'-cyclic phosphodiesterase 8A (MmPDE8) (EC 3.1.4.53)	Pde8a Pde8	0.152222	-0.46112	1.04721	0.433867	0.48368	0.553284	0.992263	0.767971
Q8R5C5	Beta-centractin (Actin-related protein 1B) (ARP1B)	Actr1b	0.188917	-0.328914	1.04491	0.527079	0.489315	0.558193	1	0.815622
A2AFS3	UPF0577 protein KIAA1324	Kiaa1324	0.153448	-0.419878	1.03394	0.460614	0.520354	0.591488	1	0.765241
A2AI52	Ubiquitin carboxyl-terminal hydrolase (EC 3.4.19.12)	Usp8	0.162274	-0.320103	1.0307	0.54832	0.507113	0.558417	0.987784	0.805547
P70195	Proteasome subunit beta type-7 (EC 3.4.25.1) (Macropain chain Z) (Multicatalytic endopeptidase complex chain Z) (Proteasome subunit Z)	Psmb7 Mmc14	0.251293	-0.327494	1.0237	0.444912	0.498643	0.58841	1	0.802303
Q9QYH6	Melanoma-associated antigen D1 (Dlxin-1) (MAGE-D1 antigen) (Neurotrophin receptor-interacting MAGE homolog)	Maged1 Nrage	0.472154	-0.380187	1.02336	0.171015	0.474559	0.680729	0.95732	0.764409
Q9CRC8	Leucine-rich repeat-containing protein 40	Lrrc40	0.499435	-0.477165	1.01187	0.0352712	0.496394	0.718339	1	0.740999
E9PZH4	Bleomycin hydrolase (Fragment)	Blmh	0.318267	-0.622378	1.00525	0.0646073	0.515134	0.63011	1	0.688439
O70400	PDZ and LIM domain protein 1 (C-terminal LIM domain protein 1) (Elfin) (LIM domain protein CLP-36)	Pdlim1 Clim1	0.131435	-0.358129	1.00421	0.514646	0.513245	0.546153	1	0.781519
Q9CZT8	Ras-related protein Rab-3B	Rab3b	-0.926543	0.532513	-1.00113	0.457923	0.882046	0.539557	0.463918	0.624196
Q9QUI0	Transforming protein RhoA	Rhoa Arha Arha2	-0.174683	0.637317	-1.00555	-0.193549	0.947054	0.843987	0.476978	0.751687
Q91VH6	Protein MEMO1 (Mediator of ErbB2-driven cell motility 1) (Memo-1)	Memo1	0.109954	0.737679	-1.02666	-0.398931	0.83724	0.912192	0.419464	0.711752
F6SS03	Centromere protein V (Fragment)	Cenpv	-0.0135038	0.378048	-1.03128	-0.639729	0.917401	0.912783	0.455736	0.600645
G3UWW1	Microtubule-associated protein (Fragment)	Map2 Mtap2	0.171067	0.359371	-1.04477	-0.856469	0.850327	0.954487	0.428357	0.570531
Q03517	Secretogranin-2 (Chromogranin-C) (Secretogranin II) (SgII) [Cleaved into: Secretoneurin (SN); Manserin]	Scg2 Chgc Scg-2	-0.327894	0.586939	-1.07621	-0.161373	0.953997	0.767434	0.468564	0.696254
P26339	Chromogranin-A (CgA) [Cleaved into: Pancreastatin; Beta-granin; WE-14; Catestatin; GE-25; Serpinin-RRG; Serpinin (AL26); p-Glu serpinin precursor]	Chga	-0.319725	0.46309	-1.08098	-0.298165	1	0.804382	0.476551	0.652508
Q91WE2	Protein FAM192A (NEFA-interacting nuclear protein NIP30)	Fam192a Nip30	0.123029	0.415409	-1.09168	-0.799301	0.92099	1	0.443891	0.581521
P47867	Secretogranin-3 (Secretogranin III) (SgIII)	Scg3	-0.216034	0.360711	-1.10091	-0.524169	1	0.867871	0.493087	0.625473
P27661	Histone H2AX (H2a/x) (Histone H2A.X)	H2afx H2a.x H2ax Hist5-2ax	0.218727	0.397104	-1.13475	-0.956376	0.826013	0.928149	0.375197	0.53292
E0CYN1	Histone H3.3 (Fragment)	H3f3a	0.142002	0.408493	-1.13723	-0.870741	0.783951	0.809771	0.378215	0.457923
F7C9G3	4-aminobutyrate aminotransferase, mitochondrial (Fragment)	Abat	-0.0662308	0.435927	-1.14875	-0.646591	0.972074	0.930645	0.444519	0.625352
D3YW43	Heat shock cognate 71 kDa protein	Hspa8	-0.106215	0.567919	-1.15778	-0.483647	0.87575	0.796803	0.38558	0.598791
D3YU45	Uncharacterized protein	Gm3940	-0.136837	0.411367	-1.1583	-0.610101	0.94748	0.875477	0.424128	0.613065
H3BK86	Peptide YY (Peptide YY, isoform CRA_a)	Pyy mCG_21368	-0.308483	0.438285	-1.15916	-0.41239	0.872157	0.71986	0.419148	0.53172
F6WHQ7	Glutathione S-transferase Mu 1 (Fragment)	Gstm1	-0.0539921	0.317824	-1.21329	-0.841479	0.891612	0.855282	0.387358	0.498745
Q9QXV0	ProSAAS (IA-4) (Proprotein convertase subtilisin/kexin type 1 inhibitor) (Proprotein convertase 1 inhibitor) (pro-SAAS) [Cleaved into: KEP; Big SAAS (b-SAAS); Little SAAS (l-SAAS); Big PEN-LEN (b-PEN-LEN) (SAAS CT(1-49)); PEN; PEN-20; PEN-19; Little LEN (l-LEN); Big LEN (b-LEN) (SAAS CT(25-40))]	Pcsk1n	-0.0939486	0.531517	-1.21956	-0.594099	0.952121	0.894032	0.423355	0.623306
G3UW85	Enhancer of rudimentary homolog (MCG7617, isoform CRA_a)	Erh mCG_7617	-0.0326698	0.444796	-1.22329	-0.745828	0.876471	0.85799	0.403732	0.559728
Q00493	Carboxypeptidase E (CPE) (EC 3.4.17.10) (Carboxypeptidase H) (CPH) (Enkephalin convertase) (Prohormone-processing carboxypeptidase)	Cpe	-0.0342194	0.405727	-1.25263	-0.812685	0.985158	0.962847	0.421251	0.570413
G3X9I4	Aly/REF export factor 2 (RNA and export factor binding protein 2)	Alyref2 Refbp2 mCG_8619	0.119822	0.334108	-1.25361	-1.03932	0.906835	0.984457	0.403822	0.532532
G3UZK4	60S ribosomal protein L18 (MCG132477, isoform CRA_c)	Rpl18 mCG_132477	-0.702446	0.327219	-1.25822	-0.228553	0.905503	0.654713	0.382594	0.528122
O88958	Glucosamine-6-phosphate isomerase 1 (EC 3.5.99.6) (Glucosamine-6-phosphate deaminase 1) (GNPDA 1) (GlcN6P deaminase 1) (Oscillin)	Gnpda1 Gnpi	-0.0674467	0.324631	-1.28276	-0.890678	0.976546	0.934923	0.40285	0.540364
E9QMW9	Polypyrimidine tract-binding protein 1	Ptbp1	-0.297274	0.318196	-1.37821	-0.762741	1	0.827418	0.411609	0.528379
Q9CQR4	Acyl-coenzyme A thioesterase 13 (Acyl-CoA thioesterase 13) (EC 3.1.2.-) (Thioesterase superfamily member 2) [Cleaved into: Acyl-coenzyme A thioesterase 13, N-terminally processed]	Acot13 Them2	0.0851382	0.355637	-1.38703	-1.11653	0.89118	0.947268	0.36569	0.439107
Q8CFV9	Riboflavin kinase (EC 2.7.1.26) (ATP:riboflavin 5'-phosphotransferase) (Flavokinase) (KOI-4)	Rfk	0.099872	0.570792	-1.39245	-0.92153	0.933436	1	0.356347	0.530394
D3Z3Y8	15 kDa selenoprotein	Sept15	0.303895	0.371982	-1.3932	-1.32511	0.774643	0.957641	0.339666	0.458358
F6ZAX1	Polyadenylate-binding protein 1 (Fragment)	Pabpc1	-0.714212	0.520925	-1.399	-0.163859	0.908705	0.64593	0.404947	0.577286
P16125	L-lactate dehydrogenase B chain (LDH-B) (EC 1.1.1.27) (LDH heart subunit) (LDH-H)	Ldhb Ldh-2 Ldh2	-0.310195	0.649486	-1.44325	-0.483568	1	0.823887	0.386836	0.622336
F6W5Q8	Vacuolar protein sorting-associated protein VTA1 homolog (Fragment)	Vta1	0.0557252	0.818725	-1.45341	-0.690413	0.814646	0.867702	0.323186	0.598979
A2A6G7	LIM and SH3 domain protein 1 (Fragment)	Lasp1	0.0797302	0.503141	-1.50106	-1.07765	0.876575	0.919837	0.329013	0.525507
D3YW97	Ubiquitin-fold modifier 1	Ufm1	-0.641497	0.464871	-1.56628	-0.459916	0.874891	0.552404	0.301674	0.482802
D3Z2E6	40S ribosomal protein S4	Rps4l-ps	0.183659	0.313482	-1.56829	-1.43847	0.827037	0.910988	0.401571	0.456925
E9PV44	ATPase inhibitor, mitochondrial	Atpif1	0.04835	1.03216	-1.64516	-0.661349	0.745546	0.746515	0.274328	0.60081
O70456	14-3-3 protein sigma (Stratifin)	Sfn Mkrn3	0.138113	0.575521	-1.6603	-1.22289	0.886918	0.970146	0.304348	0.48524
P12968	Islet amyloid polypeptide (Amylin) (Diabetes-associated peptide) (DAP)	Iapp	0.223056	1.0552	-1.81388	-0.981744	0.820294	0.905027	0.316972	0.526773
Q8VCN5	Cystathionine gamma-lyase (EC 4.4.1.1) (Cysteine-protein sulfhydrase) (Gamma-cystathionase)	Cth	-0.095157	0.313049	-1.82133	-1.41313	0.982103	0.92274	0.310181	0.424915
Q8CGP7	Histone H2A type 1-K	Hist1h2ak	0.685573	1.5088	-1.93841	-1.11519	0.522634	0.860759	0.167285	0.518678
P15864	Histone H1.2 (H1 VAR.1) (H1c)	Hist1h1c H1f2	-0.524262	0.339795	-2.02878	-1.16472	0.987882	0.727625	0.276272	0.345717
E9Q6L3	Methylglutaconyl-CoA hydratase, mitochondrial	Auh	0.359754	0.374868	-2.06194	-2.04682	0.763859	0.955494	0.196216	0.253279
A2A6H0	LIM and SH3 domain protein 1 (Fragment)	Lasp1	0.136196	0.503412	-2.12388	-1.75667	0.824048	0.895306	0.193897	0.384985
G3X9D5	Histone H2B type 2-B (MCG48964, isoform CRA_a)	Hist2h2bb mCG_48964	0.136072	1.1911	-2.18441	-1.12939	0.894747	0.981717	0.226647	0.512033
F8WIX8	Histone H2A	Hist1h2al	0.123107	0.604498	-2.22795	-1.74656	0.919706	0.998349	0.211961	0.405071
P10853	Histone H2B type 1-F/J/L (H2B 291A)	Hist1h2bf H2b-f; Hist1h2bj H2b-j; Hist1h2bl H2b-l; Hist1h2bn H2b-n	0.513893	1.25169	-2.76658	-2.02878	0.722899	1	0.146871	0.311586
I7HFT9	Histone H1t (Histone cluster 1, H1t)	Hist1h1t RP23-283N14.20-001	0.137147	0.533485	-3.32012	-2.92378	0.845312	0.881387	0.0970748	0.270111
P60041	Somatostatin [Cleaved into: Antrin; Somatostatin-28; Somatostatin-14]	Sst Smst	0.0240162	0.646502	-3.50106	-2.87857	0.899489	0.896288	0.140004	0.251543

## Sheet: S-2
S-2. The list of recovered phosphopeptides.
PhosphoPeptide Sequence`						Average of Ratio				Average of relative percentages
(Sp,Tp,Yp; phosphorylation)	Phosphosites #	Phosphosites	Accession no.	Common name	Gene symbols	NG/N	DG/D	D/N	DG/NG	Normal	Normal+G	db/db	db/db+G
SpAYVYMK	1	S23	A2AHC8	Predicted gene 5751 (Fragment)	Gm5751	10.3542	-1.10923	11.8948	0.431388	0	0.344066	1	0.465369
KTGNTpKEKKR	1	T1161	Q61687	Transcriptional regulator ATRX (EC 3.6.4.12) (ATP-dependent helicase ATRX) (HP1 alpha-interacting protein) (HP1-BP38 protein) (Heterochromatin protein 2) (X-linked nuclear protein)	Atrx Hp1bp2 Xnp	10.5021	-5.37931	11.1601	-4.72131	0	0.593777	0.916401	0.5
QEYpKRMQKRR	1	Y87	B1AXD8	Akirin-2	Akirin2	4.84603	-5.49183	11.1282	0.79035	0	0.13731	1	0.410715
QTYpHKETpR	2	Y503,T507	E9PUA3	IQ motif and SEC7 domain-containing protein 1	Iqsec1	11.46	-5.96995	11.0657	-6.36427	0	1	0.769171	0.159825
EGEEPTVYSDDEEPKDETpAR	1	T190	O55022	Membrane-associated progesterone receptor component 1	Pgrmc1 Pgrmc	2.40925	-1.3738	6.29479	2.51174	0.015928	0.100203	1	0.412443
KWWKSpLKTpRK	2	S300,T303	Q03734	Serine protease inhibitor A3M (Serpin A3M)	Serpina3m	4.85133	-0.499605	6.01711	0.666175	0	0.5	0.5	0.250137
DAGTIAGLNVMRIINEPTpAAAIAYpGLDK	2	T204,Y210	P20029	78 kDa glucose-regulated protein (GRP-78) (Heat shock 70 kDa protein 5) (Immunoglobulin heavy chain-binding protein) (BiP)	Hspa5 Grp78	1.91558	-1.18746	5.67268	2.56964	0.0197219	0.0867356	1	0.439346
AAAQTQPADSSDDSpSpDDSDSSSEEEK	2	S334,S335	E9Q5C9	Protein Nolc1	Nolc1	1.08399	-2.18116	5.64347	2.37832	0.0645014	0.08424	1	0.281341
HNYSpCKK	1	S430	L7N221	Vomeronasal 2, receptor 112	Vmn2r112	6.75436	-5.21357	5.52474	-6.44319	0.132745	1	0.428655	0.240587
RQTKKQKTpRR	1	T1211	Q6GQT9	Nodal modulator 1	Nomo1	-0.506323	-5.55636	5.42433	0.374288	0.464433	0.23019	1	0.38675
SNSSDAPGEESSpSETEK	1	S244	Q9JIK5	Nucleolar RNA helicase 2 (EC 3.6.4.13) (DEAD box protein 21) (Gu-alpha) (Nucleolar RNA helicase Gu) (Nucleolar RNA helicase II) (RH II/Gu)	Ddx21	1.31194	-0.724712	4.99943	2.96278	0.0635858	0.126139	1	0.646729
SNSSDAPGEESSSpETEK	1	S245	Q9JIK5	Nucleolar RNA helicase 2 (EC 3.6.4.13) (DEAD box protein 21) (Gu-alpha) (Nucleolar RNA helicase Gu) (Nucleolar RNA helicase II) (RH II/Gu)	Ddx21	1.31194	-0.724712	4.99943	2.96278	0.0635858	0.126139	1	0.646729
AAAQTQPADSSDDSpSDDSpDSSSEEEK	2	S334,S338	E9Q5C9	Protein Nolc1	Nolc1	0.928604	-1.18128	4.57847	2.46859	0.0999913	0.139453	1	0.441025
AAAQTQPADSSDDSSpDDSpDSSSEEEK	2	S335,S338	E9Q5C9	Protein Nolc1	Nolc1	0.928604	-1.18128	4.57847	2.46859	0.0999913	0.139453	1	0.441025
KSpYpPEKSpHPEK	3	S454,Y455,S459(S464,Y465,S469)	A2ARP9	Cation channel sperm-associated protein 2 (CatSper2)	Catsper2	1.13855	-0.833432	4.54352	2.57154	0.0429702	0.0944124	1	0.567093
TpRRSGWR	1	T149	F6QEG2	Predicted gene 10638	Gm10638	1.83343	-1.37755	4.22946	1.01848	0.0579406	0.191814	1	0.386534
EEDEEAESPPEKKSGDEGSpEDEASpSGED	2	S225,S230	Q80XU3	Nuclear ubiquitous casein and cyclin-dependent kinase substrate 1 (JC7)	Nucks1 Nucks	0.58239	-1.41925	4.22038	2.21874	0.0728589	0.147132	1	0.448326
APQNASQDSpEGKPAAEELPEK	1	S193	D3YY98	Syntaxin-18 (Fragment)	Stx18	1.23117	-0.902584	4.17216	2.0384	0.0559491	0.146801	1	0.539203
FTpRAGTYpSAHLKQAIDLKMELELALKK	2	T356,Y361	E9PZL9	UV-stimulated scaffold protein A	Uvssa	-0.102939	-2.09116	4.1581	2.16988	0.0561112	0.0561919	1	0.235129
FTpRAGTYSpAHLKQAIDLKMELELALKK	2	T356,S362	E9PZL9	UV-stimulated scaffold protein A	Uvssa	-0.102939	-2.09116	4.1581	2.16988	0.0561112	0.0561919	1	0.235129
SNSSDAPGEESSpSpETEK	2	S244,S245	Q9JIK5	Nucleolar RNA helicase 2 (EC 3.6.4.13) (DEAD box protein 21) (Gu-alpha) (Nucleolar RNA helicase Gu) (Nucleolar RNA helicase II) (RH II/Gu)	Ddx21	1.27926	-0.731733	4.09505	2.08405	0.107562	0.229158	1	0.618979
KLSpKFGSpISYpKHR	3	S310,S314,Y317	P52963	Band 4.1-like protein 4A (Protein NBL4)	Epb41l4a Epb4.1l4 Epb4.1l4a Epb41l4	0.485056	-10.4086	3.96501	-6.9286	0.200732	0.194489	1	0.0316346
GATpDEMK	1	T805	P35761	Dual specificity protein kinase TTK (EC 2.7.12.1) (ESK) (PYT)	Ttk Esk	1.20642	-1.06415	3.94433	1.67376	0.065733	0.152363	1	0.478653
AAAQTQPADSSDDSpSpDDSpDSSSEEEK	3	S334,S335,S338	E9Q5C9	Protein Nolc1	Nolc1	-0.242687	-1.27853	3.9346	2.89875	0.109212	0.087554	1	0.417817
SpLSpSpYpRGKYSELVTAFQTLQR	4	S170,S172,S173,Y174	Q91VW5	Golgin subfamily A member 4 (tGolgin-1)	Golga4	0.326329	-0.854123	3.93385	2.7534	0.0662594	0.0833947	1	0.555946
AAAQTQPADSSpDDSSDDSpDSSSEEEK	2	S331,S338	E9Q5C9	Protein Nolc1	Nolc1	0.46003	-0.762465	3.92421	2.70172	0.149963	0.159389	1	0.609718
KLEDRNTpLLADER	1	T309	D3Z4U5	Janus kinase and microtubule-interacting protein 1	Jakmip1	-0.052127	-1.07192	3.86283	2.84303	0.0751999	0.0685095	1	0.477994
QKSDAEEDGVTGSQDEEDSpKPK	1	S569	P35564	Calnexin	Canx	0.49736	-1.55594	3.85315	1.79985	0.208567	0.184319	1	0.471004
TAVLDFVDDYpLKRVCKLYpSEQR	2	Y141,Y149	D3YY98	Syntaxin-18 (Fragment)	Stx18	0.527534	-1.70639	3.82843	1.59451	0.0703929	0.101586	1	0.306522
RMDLVLELKNNASpK	1	S2092	P11881	Inositol 1,4,5-trisphosphate receptor type 1 (IP3 receptor isoform 1) (IP3R 1) (InsP3R1) (Inositol 1,4,5-trisphosphate-binding protein P400) (Protein PCD-6) (Purkinje cell protein 1) (Type 1 inositol 1,4,5-trisphosphate receptor) (Type 1 InsP3 receptor)	Itpr1 Insp3r Pcd6 Pcp1	1.69651	-0.62449	3.80064	1.47963	0.0719552	0.236219	1	0.658266
MLAESDDSGDEESpVSpQTDK	2	S196,S198	Q3B7Z2	Oxysterol-binding protein 1	Osbp Kiaa4220	0.232319	-1.44714	3.7804	2.10093	0.144813	0.144617	1	0.452508
ERDTpARQQLETVEKEKDAK	1	T595	E9Q7G0	Protein Numa1	Numa1	-0.935658	-2.21902	3.77986	2.49649	0.139203	0.0622299	1	0.347219
QDVFGEGSpEER	1	S887	J3QNE8	Putative sodium-coupled neutral amino acid transporter 10	Slc38a10	1.1505	-0.760909	3.77864	1.86724	0.0740955	0.16987	1	0.590132
MLAESDDSGDEESpVSQTDK	1	S196	Q3B7Z2	Oxysterol-binding protein 1	Osbp Kiaa4220	0.475487	-1.21268	3.76055	2.07238	0.173123	0.187504	1	0.561298
REYCMYYpNR	1	Y671	D3Z081	Protein Gm7353	Gm7353	0.793634	-0.530014	3.71024	2.38659	0.0843443	0.140498	1	0.692933
QKSDAEEDGVTGSpQDEEDSpKPK	2	S563,S569	P35564	Calnexin	Canx	0.0047896	-9.14428	3.65924	-5.48983	0.230473	0.199213	1	0.0823123
SCKELLPKGSpK	1	S16	D3YZ32	Mitochondrial fission 1 protein	Fis1	0.693789	-0.662131	3.65854	2.30262	0.086566	0.137248	1	0.632725
QKSDAEEDGVTpGSQDEEDSKPK	1	T561	P35564	Calnexin	Canx	0.769528	-1.32637	3.64847	1.55257	0.149372	0.219484	1	0.488901
SSpRMLAVFPANGK	1	S629	A2APX6	Sodium channel protein	Scn1a	1.10739	-0.775714	3.63869	1.75559	0.0802908	0.173703	1	0.595923
SDQSSTEDSpGKPTGGNSGK	1	S134	Q62313	Trans-Golgi network integral membrane protein 1 (TGN38A)	Tgoln1 Ttgn1	0.635166	-1.60105	3.60081	1.36459	0.151032	0.195751	1	0.446485
KGTGDCSpDEEVDGK	1	S1943	Q8VDD5	Myosin-9 (Cellular myosin heavy chain, type A) (Myosin heavy chain 9) (Myosin heavy chain, non-muscle IIa) (Non-muscle myosin heavy chain A) (NMMHC-A) (Non-muscle myosin heavy chain IIa) (NMMHC II-a) (NMMHC-IIA)	Myh9	1.4308	-2.08736	3.60027	0.0821149	0.143697	0.25017	1	0.313988
KKAVLFCLSpEDKK	1	S41	F8WGL3	Cofilin-1	Cfl1	-0.346961	-0.465274	3.59379	3.47548	0.0987433	0.0847517	1	0.729056
GSPCNTPSSpSpPK	2	S873,S874	E9Q8T1	Transforming acidic coiled-coil-containing protein 2	Tacc2	0.7939	-1.0748	3.57005	1.70135	0.148523	0.187478	1	0.539862
SQSSDTEQPSPTpSGGGK	1	T506	Q8BGD9	Eukaryotic translation initiation factor 4B (eIF-4B)	Eif4b	0.643465	-1.47151	3.55065	1.43568	0.148402	0.238429	1	0.472219
FLYpSISSGDK	1	Y80	Q8VFZ8	Olfactory receptor	Olfr781 mCG_1048721	-0.00947264	-0.410949	3.53504	3.13356	0.104566	0.0981236	0.956598	0.758296
FLYpSLSSGDK	1	Y80	Q8VGI7	Olfactory receptor	Olfr799	-0.00947264	-0.410949	3.53504	3.13356	0.104566	0.0981236	0.956598	0.758296
RTGERQNLSpPTpDPRVQK	2	S42,T44	Q9D1B1	Cystatin	Cst6 mCG_11738	1.09173	-0.778974	3.52797	1.65727	0.101754	0.195788	1	0.611885
SpKLEKVEKER	1	S1264	B2RRE2	Myo18a protein (Unconventional myosin-XVIIIa)	Myo18a	0.84824	-0.958381	3.50967	1.70305	0.0882791	0.160036	1	0.514849
AAAQTQPADSSpDDSSpDDSpDSSSEEEK	3	S331,S335,S338	E9Q5C9	Protein Nolc1	Nolc1	-0.16416	-1.01108	3.49705	2.65013	0.128311	0.110831	1	0.497916
KSpPENTEGK	1	S6	Q9DCB1	High mobility group nucleosome-binding domain-containing protein 3	Hmgn3	1.02246	-0.668272	3.47943	1.7887	0.128561	0.220412	1	0.670864
QTRTpGTpKHKLSDDPCPIDSKKAK	2	T616,T618	A2ABV5	Mediator of RNA polymerase II transcription subunit 14 (Cofactor required for Sp1 transcriptional activation subunit 2) (CRSP complex subunit 2) (Mediator complex subunit 14) (Thyroid hormone receptor-associated protein complex 170 kDa component) (Trap170)	Med14 Crsp2 Gm641 Trap170	0.0527457	-0.837345	3.40634	2.51625	0.0986998	0.106	1	0.562012
ELVDDSpITNVK	1	S119	E0CYV0	Protein-L-isoaspartate O-methyltransferase (EC 2.1.1.77)	Pcmt1	0.631673	-0.607105	3.3853	2.14652	0.105149	0.151572	1	0.656528
AKPAAQSEEETATpSpPAASPTPQSAER	2	T74,S75	Q8JZQ9	Eukaryotic translation initiation factor 3 subunit B (eIF3b) (Eukaryotic translation initiation factor 3 subunit 9) (eIF-3-eta) (eIF3 p116)	Eif3b Eif3s9	0.933866	-0.97024	3.376	1.47189	0.124839	0.232173	1	0.53555
AAASSSSSSSpSDDSEEEK	1	S234	E9Q5C9	Protein Nolc1	Nolc1	0.94721	-0.880308	3.36612	1.53861	0.16671	0.253478	1	0.553232
EGKPEDEVEPEDEEKSpDEDEKPDK	1	S30	A2AEC1	Transcription elongation factor A protein-like 3 (Fragment)	Tceal3	0.12676	-0.501305	3.36092	2.73285	0.0973902	0.107187	1	0.72083
KSpKNSpCLDVMVK	2	S83,S86	A2BEI5	Predicted gene 11758 (Predicted gene 13871)	Gm11758 Gm13871	0.191154	-0.446363	3.33202	2.69451	0.0993786	0.114261	1	0.734054
NPFDYpLNGEYpRAK	2	Y467,Y472	Q5DTI8	Extended synaptotagmin-3 (E-Syt3)	Esyt3 D9Ertd280e Fam62c Kiaa4186	0.320392	-0.850903	3.30887	2.13757	0.101523	0.126581	1	0.554799
GSDSEEEETNRDSpQSEK	1	S585	Q8VHE0	Translocation protein SEC63 homolog	Sec63 Sec63l	0.951367	-0.556079	3.30753	1.80008	0.108657	0.198182	1	0.680855
EGYpNVYGTESpVK	2	Y878,S885	B0QZW1	Glutamate receptor 3	Gria3	0.299189	-0.554901	3.24289	2.3888	0.168069	0.181508	1	0.712501
AKPVVSDDDSEEEQEEDRSGSpGSEED	1	S1608	Q3TKT4	Transcription activator BRG1 (EC 3.6.4.-) (ATP-dependent helicase SMARCA4) (BRG1-associated factor 190A) (BAF190A) (Protein brahma homolog 1) (SNF2-beta) (SWI/SNF-related matrix-associated actin-dependent regulator of chromatin subfamily A member 4)	Smarca4 Baf190a Brg1 Snf2b Snf2l4	2.633	-0.873952	3.21854	-0.288413	0.115162	0.677686	1	0.547787
AKPVVSDDDSEEEQEEDRSpGSGSEED	1	S1606	Q3TKT4	Transcription activator BRG1 (EC 3.6.4.-) (ATP-dependent helicase SMARCA4) (BRG1-associated factor 190A) (BAF190A) (Protein brahma homolog 1) (SNF2-beta) (SWI/SNF-related matrix-associated actin-dependent regulator of chromatin subfamily A member 4)	Smarca4 Baf190a Brg1 Snf2b Snf2l4	2.633	-0.873952	3.21854	-0.288413	0.115162	0.677686	1	0.547787
KELTpPLEK	1	T147	D6RGB6	VPS9 domain-containing protein 1	Vps9d1 1300018I17Rik	0.389578	-1.79655	3.2028	1.01668	0.194386	0.2342	1	0.385291
LRPLSYPDTDVLLLCFSpIGNPDSFGNIPHK	1	S85	Q9CR99	Protein 4930544G11Rik (RIKEN cDNA 4930544G11)	4930544G11Rik mCG_125315	-1.70182	-0.628452	3.16695	4.24032	0.119919	0.0347784	1	0.668191
HSpPDRQDGPVPK	1	S95	F6XU64	G patch domain and KOW motifs-containing protein (Fragment)	Gpkow	1.01455	-0.546944	3.16592	1.60442	0.127042	0.231591	1	0.687693
GPVAGTGEDSpESpSpSpKEESDSEEETPAQIK	4	S757,S759,S760,S761	H3BIX0	Treacle protein (Fragment)	Tcof1	0.202609	-2.03537	3.12382	0.885833	0.138394	0.157363	1	0.282049
AAAQTQPADSSDDSpSDDSDSSSEEEK	1	S334	E9Q5C9	Protein Nolc1	Nolc1	0.442997	-0.583598	3.10314	2.07654	0.232831	0.197584	0.969795	0.709193
AAAQTQPADSSDDSSDDSpDSSSEEEK	1	S338	E9Q5C9	Protein Nolc1	Nolc1	0.442997	-0.583598	3.10314	2.07654	0.232831	0.197584	0.969795	0.709193
AAAQTQPADSSDDSSpDDSDSSSEEEK	1	S335	E9Q5C9	Protein Nolc1	Nolc1	0.442997	-0.583598	3.10314	2.07654	0.232831	0.197584	0.969795	0.709193
GSDSEEEETNRDSQSpEK	1	S587	Q8VHE0	Translocation protein SEC63 homolog	Sec63 Sec63l	0.739364	-0.658569	3.09755	1.69962	0.134305	0.204964	1	0.64632
MFQTpKFK	1	T345	Q8BH32	Sushi domain-containing protein 4	Susd4	0.527163	-0.489825	3.09298	2.07599	0.129124	0.200992	1	0.721586
QKSDAEEDGVTGSpQDEEDSpK	2	S563,S569	P35564	Calnexin	Canx	0.0463011	-0.77265	3.09134	2.27238	0.186153	0.177404	1	0.585663
GTGLDEAMEWLVETpLKSpR	2	T176,S179	P61211	ADP-ribosylation factor-like protein 1	Arl1	0.242574	-0.868118	3.09013	1.97944	0.128166	0.141244	1	0.565526
VGSLTPPSpSpPK	2	S621,S622	Q3UHJ0	AP2-associated protein kinase 1 (EC 2.7.11.1) (Adaptor-associated kinase 1)	Aak1 Kiaa1048	0.48682	-0.609864	3.08757	1.99089	0.147836	0.18779	1	0.655823
LIEDERSDREETpESpSpEGEETpAAGAGAK	4	T346,S348,S349,T354	Q924Z4	Ceramide synthase 2 (CerS2) (LAG1 longevity assurance homolog 2) (Translocating chain-associating membrane protein homolog 3) (TRAM homolog 3)	Cers2 Lass2 Trh3	-0.143593	-2.39595	3.07475	0.822395	0.25129	0.282983	1	0.193401
LAAISKASpK	1	S1583	Q0VAV2	Exophilin-5 (Synaptotagmin-like protein homolog lacking C2 domains b) (SlaC2-b) (Slp homolog lacking C2 domains b)	Exph5 Kiaa0624 Slac2b	1.19219	-1.34655	3.05467	0.515929	0.123862	0.275734	1	0.400066
AAAQTQPADSpSpDDSSDDSpDSSSEEEK	3	S330,S331,S338	E9Q5C9	Protein Nolc1	Nolc1	0.213837	-0.924108	3.0375	1.89955	0.14475	0.171761	1	0.564145
LQEEVPSpEEQMPQEK	1	S213,S215	Q91XA2	Golgi membrane protein 1 (Golgi membrane protein GP73) (Golgi phosphoprotein 2)	Golm1 Golph2	0.732943	-0.721834	3.03358	1.5788	0.123918	0.203343	1	0.607655
DDRSpDVESpSpSpEEEDETTHK	4		Q9D6K9	Ceramide synthase 5 (CerS5) (EC 2.3.1.24) (LAG1 longevity assurance homolog 5) (Translocating chain-associating membrane protein homolog 4) (TRAM homolog 4)	Cers5 Lass5 Trh4	0.793887	-0.94555	3.02841	1.28897	0.184869	0.291969	1	0.557826
AKPAAQSEEETATpSPAASpPTPQSAER	2	T74,S79	Q8JZQ9	Eukaryotic translation initiation factor 3 subunit B (eIF3b) (Eukaryotic translation initiation factor 3 subunit 9) (eIF-3-eta) (eIF3 p116)	Eif3b Eif3s9	0.741551	-0.722339	3.01813	1.55424	0.141312	0.256389	1	0.636254
AKPAAQSEEETATSpPAASpPTPQSAER	2	S75,S79	Q8JZQ9	Eukaryotic translation initiation factor 3 subunit B (eIF3b) (Eukaryotic translation initiation factor 3 subunit 9) (eIF-3-eta) (eIF3 p116)	Eif3b Eif3s9	0.741551	-0.722339	3.01813	1.55424	0.141312	0.256389	1	0.636254
VPTEEEDGSSpLEADMECPNQRPTESSDVDK	1	S510	E9Q0U7	Heat shock protein 105 kDa	Hsph1	0.236838	-1.0483	3.01684	1.7317	0.205106	0.186436	1	0.556513
AETSESSGSAPAVPEASpASPK	1	S78	D3YY81	Methyl-CpG-binding protein 2	Mecp2	0.749917	-0.405272	3.01519	1.86001	0.127594	0.208162	1	0.755737
KKKDDDAESpGK	1	S3613	F8WI37	Histone-lysine N-methyltransferase (EC 2.1.1.43)	Kmt2c Mll3	1.29979	-1.0778	2.98871	0.611118	0.130892	0.315481	1	0.484207
WRKFITpKTpPLELK	2	T665,T667	E9QP46	Nesprin-2	Syne2	-0.57953	-0.818963	2.96708	2.72765	0.135017	0.086675	1	0.567235
EEPLSEEEPCTSpTAVPSPEK	1	S516	Q6DFW4	Nucleolar protein 58 (MSSP) (Nucleolar protein 5) (SIK-similar protein)	Nop58 Nol5	0.79089	-1.00109	2.96675	1.17477	0.182279	0.283771	1	0.571651
AGDSADMSpPCRSPTpTPR	2	S801,T807	D3Z6K8	Ras-specific guanine nucleotide-releasing factor 2	Rasgrf2	0.415894	-0.408281	2.96568	2.14151	0.128891	0.170812	1	0.753767
GFGFKNSpIFHR	1	S2940	Q9ERU9	E3 SUMO-protein ligase RanBP2 (EC 6.3.2.-) (Ran-binding protein 2) (RanBP2)	Ranbp2	-0.560523	-0.904408	2.93894	2.59505	0.130492	0.0957443	1	0.538337
KEEEETpPK	1	T548	Q9EPU4	Cleavage and polyadenylation specificity factor subunit 1 (Cleavage and polyadenylation specificity factor 160 kDa subunit) (CPSF 160 kDa subunit)	Cpsf1 Cpsf160	0.43032	-0.458199	2.93721	2.04869	0.130582	0.176381	1	0.728113
DLGHPVEEEDESpGDQEDDDDEIDDGDKDQDI	1	S940	Q9Z1Z0	General vesicular transport factor p115 (Protein USO1 homolog) (Transcytosis-associated protein) (TAP) (Vesicle-docking protein)	Uso1 Vdp	-0.721725	-1.18978	2.92592	2.45786	0.13593	0.0807606	1	0.438606
SQSSDTEQPSpPTSGGGK	1	S504	Q8BGD9	Eukaryotic translation initiation factor 4B (eIF-4B)	Eif4b	0.377957	-1.65307	2.92294	0.891913	0.168941	0.204436	1	0.43463
CSKESpLK	1	S704	Q9CZU3	Superkiller viralicidic activity 2-like 2 (EC 3.6.4.13) (ATP-dependent helicase SKIV2L2) (TRAMP-like complex helicase)	Skiv2l2	0.86018	-0.676801	2.91274	1.37576	0.140813	0.241799	1	0.66775
VSQGKSpGK	1	S294	P52196	Thiosulfate sulfurtransferase (EC 2.8.1.1) (Rhodanese)	Tst	1.83672	-2.1378	2.9037	-1.07083	0.162541	0.511809	1	0.239301
SEVQAHSpPSR	1	S1485	G3UZV6	Microtubule-associated protein (Fragment)	Map2 Mtap2	0.695804	-1.12757	2.88757	1.06419	0.13568	0.222487	1	0.457685
NFSpFSpLRDSLCR	2	S1598,S1600	E9QK89	Mediator of DNA damage checkpoint protein 1	Mdc1 Kiaa0170	0.713543	-0.48375	2.86545	1.66816	0.151826	0.23306	1	0.729734
RASpASGGARAKTpVDVGRCYpK	3	S1204,T1213,Y1220	Q3UHH1	Zinc finger SWIM domain-containing protein 8	Zswim8 Kiaa0913	0.388073	-0.632214	2.83628	1.81599	0.145542	0.1842	1	0.657604
SpMASKYpPK	2	S1089,Y1094	P35436	Glutamate receptor ionotropic, NMDA 2A (GluN2A) (Glutamate [NMDA] receptor subunit epsilon-1) (N-methyl D-aspartate receptor subtype 2A) (NMDAR2A) (NR2A)	Grin2a	0.200878	-0.694053	2.82365	1.92872	0.142819	0.165562	1	0.628157
TESGETLAGDSDFSpLKPEK	1	S222	Q62313	Trans-Golgi network integral membrane protein 1 (TGN38A)	Tgoln1 Ttgn1	-0.634841	-1.4413	2.8175	2.01104	0.255338	0.127579	1	0.470874
RSRSpSSSPSATpR	2	S185,T192	E9PW53	Protein 9330154J02Rik	9330154J02Rik	0.884151	-1.17407	2.81683	0.758609	0.143512	0.283221	1	0.443269
KELQTpKIDEMEEK	1	T344	D3Z7V3	Sarcolemmal membrane-associated protein	Slmap	1.0602	-1.25094	2.81619	0.505056	0.142767	0.296084	1	0.423193
AKPAAQSEEETpATpSPAASpPTPQSAER	3	T72,T74,S79	Q8JZQ9	Eukaryotic translation initiation factor 3 subunit B (eIF3b) (Eukaryotic translation initiation factor 3 subunit 9) (eIF-3-eta) (eIF3 p116)	Eif3b Eif3s9	0.341116	-0.581983	2.80951	1.88641	0.155221	0.197373	1	0.668256
AKPAAQSEEETpATSpPAASpPTPQSAER	3	T72,S75,S79	Q8JZQ9	Eukaryotic translation initiation factor 3 subunit B (eIF3b) (Eukaryotic translation initiation factor 3 subunit 9) (eIF-3-eta) (eIF3 p116)	Eif3b Eif3s9	0.341116	-0.581983	2.80951	1.88641	0.155221	0.197373	1	0.668256
DANLYpVSpGLPK	2	Y140,S142	A2A9R6	ELAV-like protein	Elavl4	0.42892	-0.387809	2.79305	1.97632	0.166897	0.204008	1	0.776565
GPVAGTGEDSESSSpK	1	S761	H3BIX0	Treacle protein (Fragment)	Tcof1	0.256387	-1.10771	2.78966	1.42556	0.203134	0.211038	1	0.542714
DICNSETpKKELLKK	1	T402	Q8C0R0	Ubiquitin carboxyl-terminal hydrolase 37 (EC 3.4.19.12) (Deubiquitinating enzyme 37) (Ubiquitin thioesterase 37) (Ubiquitin-specific-processing protease 37)	Usp37 Kiaa1594	-0.120652	-1.28032	2.78829	1.62862	0.212674	0.229368	1	0.486464
GEALSALDSpKANNLSpSLSpK	3	S168,S174,S177	O08547	Vesicle-trafficking protein SEC22b (ER-Golgi SNARE of 24 kDa) (ERS-24) (ERS24) (SEC22 vesicle-trafficking protein homolog B) (SEC22 vesicle-trafficking protein-like 1) (mSec22b)	Sec22b Sec22l1	0.488233	-0.759683	2.78765	1.53973	0.145301	0.205021	1	0.592453
KTpSLDLRR	1	T97	B2RS77	Ankyrin repeat domain-containing protein 2	Ankrd2	-0.028761	-0.891917	2.7847	1.92154	0.145712	0.142325	1	0.539342
GEEDGPEERSGDETPGSpEAPGDK	1	S166	Q00PI9	Heterogeneous nuclear ribonucleoprotein U-like protein 2 (MLF1-associated nuclear protein)	Hnrnpul2 Hnrpul2 Manp	-0.00490157	-0.816011	2.78417	1.97306	0.152711	0.14811	1	0.589451
AAAQTQPADSSpDDSpSDDSpDSSSEEEK	3	S331,S334,S338	E9Q5C9	Protein Nolc1	Nolc1	0.603484	-0.685049	2.7775	1.48897	0.162416	0.230703	1	0.644915
EEETpMQFK	1	T299	Q9D5T7	HORMA domain-containing protein 1 (Newborn ovary HORMA protein)	Hormad1 Nohma	1.23877	-0.830419	2.77551	0.706314	0.146057	0.355849	1	0.579942
TGRDSPENGETAIGAEDSpEK	1	S500	Q6ZQ03	Formin-binding protein 4 (Formin-binding protein 30)	Fnbp4 Fbp30 Kiaa1014	0.599075	-0.482224	2.77452	1.69322	0.151458	0.223506	1	0.716701
AAAQTQPADSSpDDSpSpDDSDSSSEEEK	3	S331,S334,S335	E9Q5C9	Protein Nolc1	Nolc1	0.723711	-0.665955	2.76032	1.37065	0.162746	0.250951	1	0.661315
GAPADHGPEGSpGGERHSpDTpDSpDR	4	S335,S341,T343,S345	Q8BU14	Translocation protein SEC62 (Translocation protein 1) (TP-1)	Sec62 Tloc1	0.852014	-1.0648	2.75972	0.842903	0.14806	0.267285	1	0.480926
SpTIQTpAEALRLPYEQWK	2	S303,T307	A2AUP1	Protein Pfkfb3	Pfkfb3	-1.05963	-0.728045	2.75949	3.09107	0.160763	0.0710744	1	0.609898
ERGPSPEGSSSSESpSPEHAPK	1	S1613	Q8BTI8	Serine/arginine repetitive matrix protein 2	Srrm2 Kiaa0324	1.02685	-0.931863	2.75232	0.793609	0.165362	0.303517	1	0.564158
KHSpQDCK	1	S187	E9Q1Z2	ENTH domain-containing 1	Enthd1	0.666081	-0.437763	2.73763	1.63379	0.157678	0.238017	1	0.742635
GEGVSQVGPGTpPPAPESpPR	2	T533,S539	P58871	182 kDa tankyrase-1-binding protein	Tnks1bp1 Kiaa1741 Tab182	0.758748	-0.870407	2.73656	1.1074	0.150639	0.262215	1	0.547003
KPLEEKPSpQPYSpAR	2	S4355,S4359	F2Z4A3	FAT atypical cadherin 1	Fat1	0.459185	-0.87045	2.71792	1.38828	0.160377	0.218606	1	0.592162
NISLSSpEEEAEGLAGHPR	1	S483	Q5U3K5	Rab-like protein 6 (GTP-binding protein Parf) (Rab-like protein 1) (RBEL1)	Rabl6 Parf	0.0314511	-0.974348	2.71168	1.70588	0.155714	0.156343	1	0.517129
TLTDEVNSpPDSpDR	2	S283,S286	Q3UID0	SWI/SNF complex subunit SMARCC2	Smarcc2	0.219079	-0.429882	2.7016	2.05264	0.155853	0.184184	1	0.744662
SPDFTNENPLETRNIAFFSTNCVEGTpAR	1	T253	Q8VDN2	Sodium/potassium-transporting ATPase subunit alpha-1 (Na(+)/K(+) ATPase alpha-1 subunit) (EC 3.6.3.9) (Sodium pump subunit alpha-1)	Atp1a1	0.639934	-0.87249	2.701	1.18857	0.165538	0.243887	1	0.546999
LIEDERSpDREETpESpSpEGEETAAGAGAK	4	S341,T346,S348,S349	Q924Z4	Ceramide synthase 2 (CerS2) (LAG1 longevity assurance homolog 2) (Translocating chain-associating membrane protein homolog 3) (TRAM homolog 3)	Cers2 Lass2 Trh3	0.275065	-1.42635	2.68965	0.988234	0.255961	0.297669	1	0.455056
SpYpSLASGAGGSGSK	2	S240,Y241	E9PXR4	Ras-related protein Rab-40C (Fragment)	Rab40c	0.45868	-0.474604	2.68284	1.74956	0.161441	0.214042	1	0.723284
TESGETLAGDSpDFSLKPEK	1	S218	Q62313	Trans-Golgi network integral membrane protein 1 (TGN38A)	Tgoln1 Ttgn1	0.0121664	-1.44906	2.67085	1.20962	0.222386	0.222758	1	0.448521
YpFQGLLNR	1	Y82	P31532	Serum amyloid A-4 protein (Amyloid A-5 protein)	Saa4 Saa5	0.0873295	-0.533826	2.6283	2.00715	0.167295	0.174108	1	0.704425
VVITVQQLSpNK	1	S321	A6H6A9	Rab GTPase-activating protein 1-like	Rabgap1l Hhl Kiaa0471	0.101259	-0.566349	2.59696	1.92935	0.166467	0.177578	1	0.676531
DGIWKPTpLVILRINR	1	T89	D3YVI5	Actin-related protein 2/3 complex subunit 1A (Fragment)	Arpc1a	-0.662846	-1.57012	2.59595	1.68867	0.321697	0.109479	1	0.336793
YGPSSVEDTTGSpGAADAKDDDDIDLFGSDDEEESEEAK	1	S90	O70251	Elongation factor 1-beta (EF-1-beta)	Eef1b Eef1b2	0.12214	-1.15556	2.59047	1.31278	0.297869	0.270806	1	0.524191
DEHGLEPASPRHSpDNPSpEEGEVKDDGLEK	2	S1369,S1373	E9PZM4	Chromodomain-helicase-DNA-binding protein 2 (CHD-2) (EC 3.6.4.12) (ATP-dependent helicase CHD2)	Chd2	0.923746	-0.441143	2.57164	1.20675	0.175718	0.343396	1	0.758467
AAVEDINPADDPNNQGEDEFEEAEQVREENLPEESpEEQK	1	S568	D3YVW2	Golgi integral membrane protein 4	Golim4	0.13516	-0.444344	2.55914	1.97964	0.170228	0.19097	1	0.735678
GPSPEGSSSSpESpSPEHAPK	2	S1611,S1613	Q8BTI8	Serine/arginine repetitive matrix protein 2	Srrm2 Kiaa0324	1.44973	-0.778288	2.55482	0.326797	0.194144	0.467436	1	0.602811
GQAESpEGDVPGPR	1	S228	E9QPK1	Cell growth regulator with EF hand domain protein 1	Cgref1	0.638722	-0.771105	2.53565	1.12582	0.174283	0.270896	1	0.595528
GGSpEGQPEGSVASNNVAPPPPGGSGR	1	S222	A2A7S8	Uncharacterized protein KIAA1522	Kiaa1522	0.869072	-0.49638	2.53377	1.16832	0.173846	0.332293	1	0.720017
PYpQCEQCGK	1	Y393	B2RUI1	Zinc finger protein 551	Znf551 Zfp551	0.191385	-0.774044	2.53065	1.56522	0.174008	0.201077	1	0.585662
LDHALSSPSSpPCEEIK	1	S15	Q8BGT8	Phytanoyl-CoA hydroxylase-interacting protein-like	Phyhipl	0.110333	-1.27558	2.52684	1.14093	0.17381	0.187316	1	0.414365
AVSNDNEDTNGDGVHEITpSRDSPVHPK	1	T177	E9QP54	Jouberin	Ahi1	0.935803	-0.565506	2.52662	1.02531	0.173639	0.332972	1	0.676552
AVSNDNEDTNGDGVHEITSpRDSPVHPK	1	S178	E9QP54	Jouberin	Ahi1	0.935803	-0.565506	2.52662	1.02531	0.173639	0.332972	1	0.676552
PKIEDVGSpDEEDDSGK	1	S255	E9Q3D6	Heat shock protein HSP 90-beta (Fragment)	Hsp90ab1	-0.13881	-0.47124	2.5211	2.18867	0.197152	0.169511	1	0.75253
AKPVVSDDDSEEEQEEDRSGSGSpEED	1	S1610	Q3TKT4	Transcription activator BRG1 (EC 3.6.4.-) (ATP-dependent helicase SMARCA4) (BRG1-associated factor 190A) (BAF190A) (Protein brahma homolog 1) (SNF2-beta) (SWI/SNF-related matrix-associated actin-dependent regulator of chromatin subfamily A member 4)	Smarca4 Baf190a Brg1 Snf2b Snf2l4	1.80054	-0.591694	2.52029	0.128057	0.177622	0.614037	1	0.664856
LTEKSEAIQKELEETpKLK	1	T594	D3Z0V9	SUN domain-containing protein 1 (Sun1 isoform eta)	Sun1	0.50245	-0.826825	2.51849	1.18922	0.186907	0.266232	1	0.604662
SpKASpTPPR	2	S9,S12	Q3V0J4	Ankyrin repeat domain-containing protein 53	Ankrd53	1.1596	-0.457709	2.5158	0.898488	0.175141	0.408491	1	0.728256
MSNCCEEISpRPR	1	S223	Q9D270	Probable palmitoyltransferase ZDHHC21 (EC 2.3.1.225) (GABA-A receptor-associated membrane protein 3) (Zinc finger DHHC domain-containing protein 21) (DHHC-21)	Zdhhc21 Gramp3	-0.381711	-1.00114	2.4973	1.87787	0.177125	0.141089	1	0.511158
AAAQTQPADSpSpDDSpSDDSpDSSSEEEK	4	S330,S331,S334,S338	E9Q5C9	Protein Nolc1	Nolc1	0.383961	-0.797781	2.47852	1.29678	0.179684	0.2459	1	0.581216
AAAQTQPADSpSpDDSpSpDDSDSSSEEEK	4	S330,S331,S334,S335	E9Q5C9	Protein Nolc1	Nolc1	0.383961	-0.797781	2.47852	1.29678	0.179684	0.2459	1	0.581216
AAAQTQPADSpSpDDSSpDDSpDSSSEEEK	4	S330,S331,S335,S338	E9Q5C9	Protein Nolc1	Nolc1	0.383961	-0.797781	2.47852	1.29678	0.179684	0.2459	1	0.581216
ASSIDSASNTpELQTpHDMSSDEK	2	T1007,T1011	E9Q3Y4	Lipopolysaccharide-responsive and beige-like anchor protein	Lrba	0.104047	-0.971948	2.47457	1.39858	0.231796	0.235311	1	0.522277
KVMEINYFGPVALTpK	1	T172	Q99J47	Dehydrogenase/reductase SDR family member 7B (EC 1.1.-.-) (Short-chain dehydrogenase/reductase family 32C member 1)	Dhrs7b Sdr32c1	0.137221	-0.969775	2.46155	1.35456	0.183241	0.207106	1	0.533549
PPTLPSpGFAFDCLTENSGK	1	S1324	Q62240	Lysine-specific demethylase 5D (EC 1.14.11.-) (Histocompatibility Y antigen) (H-Y) (Histone demethylase JARID1D) (Jumonji/ARID domain-containing protein 1D) (Protein SmcY)	Kdm5d Hya Jarid1d Smcy	0.180304	-0.857321	2.45092	1.41329	0.19518	0.216755	1	0.562536
MASpKVSPSCR	1	S3	E9Q3Q6	CD166 antigen	Alcam	0.496351	-0.405853	2.44701	1.54481	0.193386	0.259146	1	0.760485
EAAEAEPAEPSSpPAAEAEGASASSTSSPK	1	S113	P26645	Myristoylated alanine-rich C-kinase substrate (MARCKS)	Marcks Macs	0.373544	-1.03653	2.4467	1.03663	0.207529	0.259538	1	0.544604
LTHSpMKEVGGSpHK	2	S120,S127	Q8BKV0	Testican-3 (SPARC/osteonectin, CWCV, and Kazal-like domains proteoglycan 3)	Spock3	-0.141244	-0.835117	2.44535	1.75148	0.191495	0.166832	1	0.565755
DVETpPLLQITVPEKIDTNIQDAKEAETQVIK	1	T23	E9PYS3	A disintegrin and metallopeptidase domain 3	Adam3	1.25899	-1.26725	2.44373	-0.0825067	0.184707	0.531731	1	0.415996
FSpDPPSpPSVLPK	2	S255,S259	Q3TWH3	MCG12570 (Protein Pnrc1)	Pnrc1 mCG_12570	0.503515	-1.57437	2.44238	0.364493	0.191695	0.296576	1	0.33689
YpMEAIPSpK	2	Y210,S216	E9QAB5	Predicted gene 5134	Gm5134	0.305281	-0.468299	2.44165	1.66807	0.19961	0.234275	1	0.744951
EENLPEESpEEQK	1	S568	D3YVW2	Golgi integral membrane protein 4	Golim4	0.988606	-0.490617	2.43715	0.95793	0.184732	0.381814	1	0.713085
SRSpPTPQNQDGDTMVEK	1	S174	D3YWR0	GRAM domain-containing protein 1B	Gramd1b	0.724283	-0.680024	2.41904	1.01473	0.191525	0.314036	1	0.631191
EIYpDFYpNEKMK	2	Y1370,Y1373	F8VQM5	Sucrase isomaltase (alpha-glucosidase)	Sis	-0.0736313	-1.0099	2.41853	1.48226	0.215329	0.197891	1	0.512562
DGLTNAGELESpDSGSDK	1	S249	P25916	Polycomb complex protein BMI-1 (Polycomb group RING finger protein 4)	Bmi1 Bmi-1 Pcgf4	0.613932	-0.876708	2.41069	0.920046	0.201386	0.292446	1	0.562805
ARKRYGSpRNSpK	2	S25,S28	Q8BX39	Cytoplasmic polyadenylated homeobox (Cytoplasmic polyadenylated homeobox 1) (Cytoplasmic polyadenylated homeobox 2) (Cytoplasmic polyadenylated homeobox 3) (Homeobox protein ESO1)	Cphx2 Cphx Cphx1 Cphx3 Eso1	-0.125268	-0.646761	2.41038	1.88889	0.203086	0.17677	1	0.64455
LLEEHCSpSpSpSpEEEGDEDLEGK	4	S112,S113,S114,S115	E9PZN0	Protein Nfxl1	Nfxl1	0.323792	-0.761227	2.38697	1.30195	0.206516	0.264897	1	0.610501
YpDDPEVQKDTKNVPFK	1	Y128	P38647	Stress-70 protein, mitochondrial (75 kDa glucose-regulated protein) (GRP-75) (Heat shock 70 kDa protein 9) (Mortalin) (Peptide-binding protein 74) (PBP74) (p66 MOT)	Hspa9 Grp75 Hsp74 Hspa9a	-0.799064	-0.540173	2.38551	2.6444	0.192395	0.116317	1	0.69836
VASLLGKKGASATpK	1	T47	Q9EP71	Ankycorbin (Ankyrin repeat and coiled-coil structure-containing protein) (Novel retinal pigment epithelial cell protein) (Retinoic acid-induced protein 14) (p125)	Rai14 Kiaa1334 Norpeg	0.435885	-0.798953	2.36995	1.13511	0.193954	0.263109	1	0.579155
EKYpINRDYpSpK	3	Y544,Y549,S550	E9Q718	Procollagen-lysine,2-oxoglutarate 5-dioxygenase 2	Plod2	2.02488	-0.73847	2.3666	-0.396757	0.176095	0.742614	0.889626	0.545529
QQQQQQQQQQQQQQQHVTSpWPGK	1	S173	Q5SXC3	Protein Vezf1 (Fragment)	Vezf1	-0.27396	-0.87648	2.36597	1.76345	0.199685	0.165779	1	0.548301
RSGTNSpK	1	S101	D3YUS4	Ras-related protein Rab-13	Rab13	1.45637	-0.94863	2.36313	-0.041869	0.194879	0.537623	1	0.52516
EGETTVNTETSpSPK	1	S1038	Q80XP9	Serine/threonine-protein kinase WNK3 (EC 2.7.11.1) (Protein kinase lysine-deficient 3) (Protein kinase with no lysine 3)	Wnk3	0.0577327	-1.02429	2.36096	1.27893	0.198726	0.203503	1	0.492722
KLPEEHARFYpSAEISLALNYpLHER	2	Y357,Y367	F6QWV4	Protein kinase C iota type (Fragment)	Prkci	-0.456163	-1.38999	2.35824	1.42441	0.195278	0.142163	1	0.386233
IQQDSESGDELSSSpSpTEQMR	2	S220,S221	B2RUJ8	Rho GTPase activating protein 12 (Rho GTPase-activating protein 12)	Arhgap12	0.562447	-0.770933	2.35538	1.022	0.195501	0.29399	1	0.586547
YpYpEEERK	2	Y817,Y818	D3YU22	LIM and calponin homology domains-containing protein 1	Limch1	0.60315	-0.434033	2.34611	1.30893	0.196775	0.30775	1	0.740222
SNECLVSDSPEGSpPALSPS	1	S440	O08576	RUN domain-containing protein 3A (Rap2-interacting protein 8) (RPIP-8)	Rundc3a Rap2ip Rpip8	0.132686	-0.765212	2.33731	1.43942	0.20268	0.218443	1	0.611007
ELESGTEESDEEPTpPSPR	1	T459	O08648	Mitogen-activated protein kinase kinase kinase 4 (EC 2.7.11.25) (MAPK/ERK kinase kinase 4) (MEK kinase 4) (MEKK 4)	Map3k4 Mekk4	1.1012	-0.465613	2.33722	0.77041	0.202841	0.424875	1	0.726139
TQVDCELYpKEK	1	Y343	Q99KF0	Caspase recruitment domain-containing protein 14 (Bcl10-interacting MAGUK protein 2) (Bimp2)	Card14 Bimp2	-0.23746	-1.79184	2.33559	0.781207	0.513089	0.225187	1	0.457599
ESLKEEDESpDDDNM	1	S250	E0CX62	Proteasome subunit alpha type-3	Psma3	-0.188525	-0.864299	2.32913	1.65336	0.221383	0.196838	1	0.568871
GDSCDSSpEDK	1	S1057	Q61687	Transcriptional regulator ATRX (EC 3.6.4.12) (ATP-dependent helicase ATRX) (HP1 alpha-interacting protein) (HP1-BP38 protein) (Heterochromatin protein 2) (X-linked nuclear protein)	Atrx Hp1bp2 Xnp	0.825675	-0.686891	2.32048	0.807914	0.201263	0.356499	1	0.621233
TVSLFSPAFYTpAK	1	T291	P39428	TNF receptor-associated factor 1	Traf1	-0.0868533	-0.770426	2.31557	1.632	0.203241	0.195352	1	0.597014
SNGPTPELLASSpPPDNK	1	S875	F8VPU2	FERM, RhoGEF and pleckstrin domain-containing protein 1	Farp1	0.142752	-0.453013	2.30894	1.71317	0.208282	0.226951	1	0.73803
ASSIDSASNTpELQTHDMSSDEK	1	T1007	E9Q3Y4	Lipopolysaccharide-responsive and beige-like anchor protein	Lrba	0.502632	-1.01159	2.30282	0.788604	0.227547	0.302663	1	0.533826
KGTENGVNGTVTSNGADSpPR	1	S365	Q91V04	Translocating chain-associated membrane protein 1	Tram1	2.13553	-0.748036	2.3016	-0.581966	0.167388	0.721547	0.778902	0.497925
KESGGSpDDEDEDDDDDESpSpEDSpEDEEPPPK	4	S501	A2AM65	Heterochromatin protein 1-binding protein 3 (Fragment)	Hp1bp3	0.175013	-0.428256	2.29477	1.6915	0.210641	0.230795	1	0.76034
RTpPSpPPPR	2	T600,S602	A2A8V8	Serine/arginine repetitive matrix protein 1	Srrm1	0.616791	-0.52952	2.28371	1.1374	0.210212	0.316498	1	0.700389
GDYpTpSDENARKDLK	2	Y192,T193	D3Z6Q1	FERM domain-containing protein 4B	Frmd4b	-0.111446	-0.509584	2.28229	1.88415	0.210792	0.191125	1	0.703047
AAAQTQPADSpSDDSpSDDSpDSSSEEEK	3	S331,S334,S338	E9Q5C9	Protein Nolc1	Nolc1	0.814809	-0.520721	2.27126	0.935726	0.209506	0.364576	1	0.73442
AAAQTQPADSpSDDSpSpDDSDSSSEEEK	3	S330,S334,S335	E9Q5C9	Protein Nolc1	Nolc1	0.814809	-0.520721	2.27126	0.935726	0.209506	0.364576	1	0.73442
HYpDCTQCGK	1	Y888	G3X9T2	RIKEN cDNA 3000002G13 (Zinc finger protein 619)	Zfp619 3000002G13Rik mCG_1050933	0.488853	-0.758629	2.26604	1.01856	0.22777	0.313904	1	0.596595
IISpQFSpKFNCLQHVFMK	2	S265,S268	D3YUJ6	Predicted gene 3183 (Predicted gene, Gm16513)	Gm3183 Gm16513	0.134788	-0.735763	2.26395	1.3934	0.215823	0.229309	1	0.600584
QTEAETpK	1	T109	Q99LQ1	MAP3K12-binding inhibitory protein 1 (MAPK upstream kinase-binding inhibitory protein) (MUK-binding inhibitory protein)	Mbip	0.840261	-0.423228	2.26328	0.999788	0.210508	0.373791	1	0.75122
KTTpTpKK	2	T420,T421	Q9R0N4	Synaptotagmin-10 (Synaptotagmin X) (SytX)	Syt10	0.150143	-0.868498	2.26005	1.24141	0.21888	0.231819	1	0.572449
SpNIGCSMNTK	1	S423	Q8BWQ4	Cap-specific mRNA (nucleoside-2'-O-)-methyltransferase 2 (EC 2.1.1.296) (Cap methyltransferase 2) (Cap2 2'O-ribose methyltransferase 2) (MTr2) (FtsJ methyltransferase domain-containing protein 1)	Cmtr2 Ftsjd1	0.160274	-1.25626	2.25473	0.83819	0.248399	0.234181	1	0.427003
VTEENPTQPPSpREDL	1	S346	Q9CYA0	Cysteine-rich with EGF-like domain protein 2	Creld2	0.50204	-0.531167	2.2516	1.21839	0.212019	0.307213	1	0.692016
FNEEVKKQSpVSpR	2	S236,S238	O54890	Integrin beta-3 (Platelet membrane glycoprotein IIIa) (GPIIIa) (CD antigen CD61)	Itgb3	0.0729345	-0.418088	2.23886	1.74784	0.214944	0.2358	1	0.761347
HSYpSHIVERDGLLHEVASTLK	1	Y721	E9Q7D5	Protein Arhgef5	Arhgef5	4.49478	-0.556225	2.2321	-2.8189	0.0515001	1	0.2382	0.183591
DPDSALGISDGETpSpPSSK	2	T550,S551	B1AZ14	Cordon-bleu protein-like 1	Cobll1	0.707134	-0.996438	2.22684	0.523264	0.282667	0.486552	1	0.536329
TREQESpSpGEEDNDLSPEER	2	S122,S123	D3Z3A0	MCG126099, isoform CRA_b (Protein phosphatase inhibitor 2)	Ppp1r2 mCG_126099	-0.108811	-0.837539	2.2197	1.49097	0.214704	0.20143	1	0.571388
SSSSSASPSpSPSSREEK	1	S758	F8WI22	Bcl-2-associated transcription factor 1	Bclaf1	0.817179	-0.452965	2.20889	0.938746	0.217456	0.384217	1	0.734175
SPLNDASDDDDDDDSpSD	1	S247	Q91WB4	Pleckstrin homology domain-containing family F member 2 (PH domain-containing family F member 2)	Plekhf2	0.520754	-0.526499	2.20851	1.16126	0.23006	0.322742	1	0.694424
SPDEATAADQESEDDLSASRTpSLER	1	T901	F8VPU2	FERM, RhoGEF and pleckstrin domain-containing protein 1	Farp1	0.321135	-0.678503	2.2072	1.20756	0.226127	0.284943	1	0.624961
NLDAVHDITVAYpPYpNIPQTEKHLLLGDFPK	2	Y223,Y225	Q3UN02	Lysocardiolipin acyltransferase 1 (EC 2.3.1.-) (EC 2.3.1.51) (Acyl-CoA:lysocardiolipin acyltransferase 1)	Lclat1 Alcat1 Gm91 Lycat	-0.374235	-0.505966	2.20679	2.07506	0.236511	0.167122	1	0.704193
KLSGDQITpLPTTVDYSSVPK	1	T41	Q9D0V7	Receptor-binding cancer antigen expressed on SiSo cells (Cancer-associated surface antigen RCAS1) (Estrogen receptor-binding fragment-associated gene 9 protein)	Ebag9 Rcas1	0.0118998	-1.15692	2.20488	1.03607	0.339376	0.291867	1	0.544343
TDHGAEIVYKSpPVVSpGDTSPR	2	S688,S692	A2A5Y6	Microtubule-associated protein	Mapt	-0.171434	-0.713193	2.20231	1.66055	0.222333	0.197506	1	0.616251
KSpEESpQEIQKK	2	S439,S442	F8VPK5	Rho-associated protein kinase (EC 2.7.11.1)	Rock2	-0.695135	-1.05633	2.19862	1.83743	0.323136	0.213721	1	0.593735
DSCQGDSGGPLVCGGQLQGLVSpWGMER	1	S218	Q8CGR5	Kallikrein-14 (EC 3.4.21.-) (Glandular kallikrein KLK14) (mGK14) (Kallikrein related-peptidase 14)	Klk14 Gk14	-0.470656	-1.25528	2.19415	1.40953	0.218524	0.167963	1	0.424684
AVSNDNEDTpNGDGVHEITSRDSPVHPK	1	T168	E9QP54	Jouberin	Ahi1	0.616854	-0.430915	2.19144	1.14367	0.219925	0.336598	1	0.74291
RGCSpPSPGCR	1	S187	Q99MX7	Transmembrane protein 121B (Cat eye syndrome critical region protein 6 homolog)	TMEM121B Cecr6	0.505224	-0.463276	2.18941	1.22091	0.241999	0.319111	1	0.736585
KTKQTpISpLFK	2	T127,S129	P22682	E3 ubiquitin-protein ligase CBL (EC 6.3.2.-) (Casitas B-lineage lymphoma proto-oncogene) (Proto-oncogene c-Cbl) (Signal transduction protein CBL)	Cbl	0.850802	-0.703036	2.18802	0.634181	0.21987	0.406397	1	0.644386
SpPSPYYSRYR	1	S259	E9QP00	Transformer-2 protein homolog alpha	Tra2a	0.0524333	-1.43271	2.18245	0.697304	0.225104	0.233249	1	0.423967
VDNSVEAEVNSpK	1	S626	Q5U4C1	G-protein coupled receptor-associated sorting protein 1 (GASP-1)	Gprasp1 Kiaa0443	0.762814	-0.519319	2.18223	0.900094	0.220545	0.389199	1	0.699001
DDLLQLYSpDSpDDDDDEEDEEDEEEGEEEER	2	S213,S215	G3UZT4	Huntingtin-associated protein 1 (Fragment)	Hap1	0.762006	-0.730462	2.18119	0.688721	0.227124	0.374505	1	0.60325
KTELCKLQSpK	1	S515	P52194	Calmegin (A2/6) (Calnexin-T) (MEG 1 antigen)	Clgn Meg1	0.193929	-0.56591	2.17286	1.41302	0.230214	0.259846	1	0.686244
KVFDRQLHPTSpTpEK	2	S900,T901	F6TYE6	Protein Atp11b	Atp11b	-0.367486	-0.637891	2.17094	1.90054	0.234937	0.180606	1	0.644509
SLSTpSGESLYHVLGLDK	1	T11	A2AUE1	DnaJ homolog subfamily C member 5 (Fragment)	Dnajc5	-0.763582	-1.11186	2.17047	1.82219	0.342176	0.173906	1	0.552708
SpYRTAK	1	S140	B1B0B7	Putative tyrosine-protein phosphatase auxilin (Fragment)	Dnajc6	0.137472	-0.466703	2.17037	1.5662	0.229751	0.247631	1	0.723808
KTQETpQRQEKKEQRQAEK	1	T291	Q9D0B8	RIB43A-like with coiled-coils protein 1	Ribc1	0.129739	-0.63728	2.16615	1.39913	0.225098	0.245385	1	0.646158
NTVDLVNTHHLHSpSSpDDEDDR	2	S529,S531	Q7TSI3	Serine/threonine-protein phosphatase 6 regulatory subunit 1 (SAPS domain family member 1)	Ppp6r1 Kiaa1115 Pp6r1 Saps1	0.518826	-0.491325	2.16587	1.15572	0.234081	0.35164	1	0.716818
VLFEEEERSSpDSpSpQQCSpSEDEDIFEETAQVSPPR	4	S1844,S1846,S1847,S1851	Q3UGY8	Brefeldin A-inhibited guanine nucleotide-exchange protein 3	Arfgef3 Big3 D10Bwg1379e Kiaa1244	-0.302226	-0.390653	2.16539	2.07697	0.231884	0.190303	1	0.765292
GAEQSGSpDDK	1	S208	E9QNH7	Acyl-CoA-binding domain-containing protein 5	Acbd5	1.04112	-0.484613	2.16465	0.638923	0.223053	0.516789	1	0.716804
PLTQSpGGAPPPSGGK	1	S2122	P14873	Microtubule-associated protein 1B (MAP-1B) (MAP1(X)) (MAP1.2) [Cleaved into: MAP1B heavy chain; MAP1 light chain LC1]	Map1b Mtap1b Mtap5	0.175157	-1.08762	2.16034	0.897561	0.224724	0.252989	1	0.477248
EQLSpGYpKR	2	S500,Y502	Q6ZQ29	Serine/threonine-protein kinase TAO2 (EC 2.7.11.1) (Thousand and one amino acid protein 2)	Taok2 Kiaa0881	-0.155015	-0.528641	2.15508	1.78146	0.237172	0.208076	1	0.700842
RRSpPSVSSPEPTEK	1	S1683	Q8BTI8	Serine/arginine repetitive matrix protein 2	Srrm2 Kiaa0324	0.445358	-0.561064	2.13634	1.12992	0.229703	0.309743	1	0.680245
HTKYTpR	1	T854	L7N2B8	Protein Vmn2r61	Vmn2r61	0.247578	-0.4459	2.13142	1.43794	0.234239	0.304083	1	0.734501
FTpDELEQKR	1	T145	Q80VC6	tRNA selenocysteine 1-associated protein 1 (SECp43) (tRNA selenocysteine-associated protein 1)	Trnau1ap Secp43 Trspap1	-0.0743532	-0.662075	2.12511	1.53738	0.233381	0.223959	1	0.637216
VCSVEYINCSpEDEHSGNVK	1	S308	Q7TN31	Angiogenic factor with G patch and FHA domains 1 (Angiogenic factor VG5Q) (mVG5Q)	Aggf1 Vg5q	0.619852	-1.48993	2.11769	0.00790107	0.454335	0.484706	1	0.529856
VGRIEDFLYpQLEDSFLKTpK	2	Y540,T549	Q8C636	Spermatogenesis-associated protein 16	Spata16	-0.293771	-0.454138	2.11402	1.95365	0.231474	0.1901	1	0.732693
KGTENGVNGTVTSpNGADSPR	1	S360	Q91V04	Translocating chain-associated membrane protein 1	Tram1	1.97874	-0.976157	2.10994	-0.84495	0.209423	0.754187	0.804893	0.453567
SDSPESDTpER	1	T886	Q9R1C7	Pre-mRNA-processing factor 40 homolog A (Formin-binding protein 11) (FBP-11) (Formin-binding protein 3)	Prpf40a Fbp11 Fnbp3	0.825819	-0.411768	2.09912	0.861531	0.234567	0.413722	1	0.752822
ATSpPPHLDGTSNPESTVPEK	1	S528	D3YXR5	Protein PML	Pml	0.777772	-0.56044	2.09234	0.754131	0.245646	0.402769	1	0.688105
YpRFHTKR	1	Y2	Q9DAL3	Coiled-coil domain-containing protein 54	Ccdc54	0.471891	-0.440642	2.08929	1.17675	0.238643	0.326839	1	0.741259
EFHHGPDPTDTAPGEQDQDVASpSPPESSFQK	1	S380	Q9D1Q6	Endoplasmic reticulum resident protein 44 (ER protein 44) (ERp44) (Thioredoxin domain-containing protein 4)	Erp44 Kiaa0573 Txndc4	2.92041	-0.744852	2.08043	-1.58484	0.144897	1	0.562778	0.342664
MSpEAEGSLTLQSpK	2	T562	E9QPQ1	Roundabout homolog 3	Robo3	0.169178	-0.423188	2.06932	1.47695	0.238873	0.270529	1	0.748668
VTLYNADQDGSDSpPR	1	S223	Q8BUR3	Forkhead box protein J3	Foxj3 Kiaa1041	0.0284407	-0.445541	2.06373	1.58974	0.256552	0.256176	1	0.754318
EKQEAGKQKAMAQSpTpR	2	S1597,T1598	H3BKK4	Phosphoinositide phospholipase C (EC 3.1.4.11)	Plch1	1.81343	-0.973073	2.06188	-0.724622	0.239495	0.847129	0.989862	0.510478
RRSpPSVSpSPEPTEK	2	S1683,S1687	Q8BTI8	Serine/arginine repetitive matrix protein 2	Srrm2 Kiaa0324	0.429952	-0.666618	2.0602	0.963636	0.247576	0.32334	1	0.632977
PQEVTSpPCRSpSPPHDSNIK	2	S225,S229	G5E879	DNA repair protein RAD52 homolog (RAD52 homolog (S. cerevisiae), isoform CRA_a)	Rad52 mCG_131711	0.0510107	-0.436874	2.05707	1.56918	0.249825	0.250245	1	0.741541
DGDALDLEESpSSpSpEHAERPPGPR	3	S296,S298,S299	Q01338	Alpha-2A adrenergic receptor (Alpha-2A adrenoreceptor) (Alpha-2A adrenoceptor) (Alpha-2AAR)	Adra2a	0.0161729	-1.33392	2.05141	0.70131	0.345475	0.269524	1	0.495772
EDCCTpK	1	T303	A2AEG3	Glycoprotein m6b, isoform CRA_a (Neuronal membrane glycoprotein M6-b)	Gpm6b mCG_7562	0.194714	-0.867366	2.05016	0.988079	0.257035	0.277921	1	0.556615
YpVRSpYYEECPK	2	S502	Q9CXD9	Leucine-rich repeat-containing protein 17	Lrrc17	-0.508035	-0.637911	2.04572	1.91584	0.243407	0.175993	1	0.643274
VVCDADDSDSDVVSpDK	1	S372	Q8C1D8	Protein IWS1 homolog (IWS1-like protein)	Iws1 Iws1l	0.765797	-0.523972	2.04453	0.754759	0.264166	0.420507	1	0.716089
KPDLYpALAMVYSGQLK	1	Y1163	E9Q5E2	cDNA sequence BC005561	BC005561	-0.17241	-0.598461	2.03851	1.61246	0.243465	0.21615	1	0.666079
HSDSGASETSpLSpPPSSPPSRPR	2	S1271,S1273	E9Q0J5	Kinesin-like protein	Kif21a	0.263347	-0.584582	2.03403	1.18611	0.24653	0.293858	1	0.666876
YpVERTpELLKHDIGKGK	2	Y90,T94	A7TZF0	Selection and upkeep of intraepithelial T-cells protein 3 (Skint-3)	Skint3	-0.458301	-0.522854	2.02438	1.95983	0.259149	0.207066	1	0.698317
SLEETLHNVDLSpSpDDELPRDEEALEDSAEEK	2	S203,S204	Q63918	Serum deprivation-response protein (Cavin-2) (Phosphatidylserine-binding protein)	Sdpr Sdr	-1.2459	-0.653442	2.02071	2.61317	0.250278	0.105312	1	0.659827
LASPSpGSTSSGLEVVAPEVTSAPVSGPGILDDSATICR	1	S596	Q62318	Transcription intermediary factor 1-beta (TIF1-beta) (E3 SUMO-protein ligase TRIM28) (EC 6.3.2.-) (KRAB-A-interacting protein) (KRIP-1) (Tripartite motif-containing protein 28)	Trim28 Kap1 Krip1 Tif1b	0.374274	-0.523339	2.02022	1.12261	0.251697	0.322339	1	0.698979
LIEEQLTpNK	1	T174	M0QWZ1	Protein FAM193A	Fam193a	0.0794901	-0.68211	2.01954	1.25794	0.251774	0.26843	1	0.654979
KVLAIELENLKSpK	1	S170	Q8K2Q9	Shootin-1	Kiaa1598	-0.138177	-0.572901	2.00875	1.57403	0.249614	0.231937	1	0.6803
QTEVFTpLFFSpDVLEKK	2	T932,S936	E9PYT0	Rho GTPase-activating protein 5	Arhgap5	0.184174	-0.47469	2.0063	1.34744	0.266319	0.285118	1	0.71984
YDTpEKEDVVSVVK	1	T465	P57748	Matrix metalloproteinase-20 (MMP-20) (EC 3.4.24.-) (Enamel metalloproteinase) (Enamelysin)	Mmp20	2.78448	-0.407624	2.00004	-1.19206	0.145189	1	0.596275	0.445452
QQQQQQQILPGDRKPLYpHYpGR	2	Y507,Y509	F7AMS7	Misshapen-like kinase 1 (Fragment)	Mink1	1.59387	-1.1284	1.99972	-0.722555	0.255008	0.758682	1	0.484195
DFINDDDDEEEGEEDEGSpDSGDSEDDVGHK	1	S73	Q62383	Transcription elongation factor SPT6	Supt6h Kiaa0162 Supt6	-0.210732	-1.096	1.99964	1.11437	0.328111	0.264501	1	0.568972
LYCPKCMDVYpTpPK	2	Y144,T145	G3UXG7	Casein kinase II subunit beta (CK II beta)	Csnk2b	0.193501	-0.692859	1.99717	1.11081	0.265058	0.314187	1	0.627558
SKLQGLSpVSpTpGALEQIR	3	S229,S231,T232	E9PUR4	Laminin subunit alpha-3	Lama3	-0.0657705	-0.81696	1.99147	1.24028	0.262812	0.247978	1	0.571597
SLEETLHNVDLSSpDDELPRDEEALEDSpAEEK	2	S204,S218	Q63918	Serum deprivation-response protein (Cavin-2) (Phosphatidylserine-binding protein)	Sdpr Sdr	-0.52505	-0.66064	1.99102	1.85543	0.259159	0.18098	1	0.637796
LFEAKYpK	1	Y642	E9QPI9	DNA excision repair protein ERCC-6-like 2	Ercc6l2 0610007P08Rik	0.966828	-0.523785	1.98618	0.495568	0.253947	0.52743	1	0.696022
RALGSPFPKSWYpWK	1	Y120	Q91ZF4	Cathepsin Q (Cathepsin Q, isoform CRA_a) (Protein Ctsq)	Ctsq CtsQ mCG_3444	0.0639105	-0.524536	1.98523	1.39679	0.269026	0.289397	1	0.709403
QVPSpRKYSNMRK	1	S674	Q61493	DNA polymerase zeta catalytic subunit (EC 2.7.7.7) (Protein reversionless 3-like) (REV3-like) (Seizure-related protein 4)	Rev3l Polz Sez4	-0.0233247	-0.685058	1.98389	1.32215	0.25436	0.25762	1	0.635321
EMVRDEGSpSpARTpR	3	S123,S124,T127	Q8R2G6	Coiled-coil domain-containing protein 80 (Up-regulated in BRS-3 deficient mouse)	Ccdc80 Urb	0.653711	-1.03445	1.97832	0.290153	0.315664	0.437339	1	0.537452
KDLPSpLLEMDK	1	S183	Q3U155	Coiled-coil domain-containing protein 174	Ccdc174	0.325169	-0.647453	1.96345	0.990825	0.256451	0.321361	1	0.638902
DMTECSTPLPEDCSpPTHSPR	1	S2361	E9Q394	Protein Akap13	Akap13	0.11236	-0.53497	1.95955	1.31222	0.260499	0.285097	1	0.690202
GEEQEHSEPEEGSpPR	1	S1185	A2A6A1	G patch domain-containing protein 8	Gpatch8 Gpatc8 Kiaa0553	0.229882	-0.760778	1.95832	0.967657	0.278691	0.308611	1	0.612652
DKYpTLSK	1	Y270	Q8VCI0	Phospholipase B-like 1 (EC 3.1.1.-) (LAMA-like protein 1) (Lamina ancestor homolog 1) (Phospholipase B domain-containing protein 1) [Cleaved into: Phospholipase B-like 1 chain A; Phospholipase B-like 1 chain B; Phospholipase B-like 1 chain C]	Plbd1	0.0501679	-0.488182	1.95563	1.41728	0.257881	0.268921	1	0.713932
IKSMATpSRR	1	T1754	A3KGU5	Spectrin alpha chain, non-erythrocytic 1	Sptan1 Spna2	0.351099	-0.664479	1.95553	0.939947	0.261377	0.343818	1	0.631413
DDRSpDIESSpSpDDEDSEPPGK	3	S341,S346,S347	H3BL08	Ceramide synthase 6	Cers6 Lass6	0.523533	-0.594175	1.95422	0.836517	0.27328	0.403889	1	0.66984
SpPSGGAAGPLLTPSQSLDGSR	1	S187	Q6WVG3	BTB/POZ domain-containing protein KCTD12 (Pfetin) (Predominantly fetal expressed T1 domain)	Kctd12 Pfet1	0.340282	-0.389162	1.9482	1.21876	0.260627	0.330282	1	0.764041
STPGVSDDSDQCDSTpQDI	1	T349	K3W4R3	Dysbindin	Dtnbp1	-0.419062	-0.677797	1.94469	1.68596	0.261305	0.195822	1	0.628325
EEEEGISQESpSEEEQ	1	S102	P17095	High mobility group protein HMG-I/HMG-Y (HMG-I(Y)) (High mobility group AT-hook protein 1) (High mobility group protein A1)	Hmga1 Hmgi Hmgiy	0.33043	-0.737872	1.94038	0.872076	0.26063	0.329077	1	0.60518
SpPSGGAAGPLLTPSQSLDGSRR	1	S187	Q6WVG3	BTB/POZ domain-containing protein KCTD12 (Pfetin) (Predominantly fetal expressed T1 domain)	Kctd12 Pfet1	-0.0282686	-0.395853	1.93905	1.57146	0.260824	0.256519	1	0.762868
RSPSVSSPEPTpEK	1	T1692	Q8BTI8	Serine/arginine repetitive matrix protein 2	Srrm2 Kiaa0324	0.426605	-0.434547	1.93342	1.07226	0.269178	0.352661	1	0.747224
NTVDLVNTHHLHSSpSpDDEDDR	2	S530,S531	Q7TSI3	Serine/threonine-protein phosphatase 6 regulatory subunit 1 (SAPS domain family member 1)	Ppp6r1 Kiaa1115 Pp6r1 Saps1	0.444576	-0.455946	1.93102	1.0305	0.271717	0.386318	1	0.735879
KSDLETSpEPK	1	S340	P25799	Nuclear factor NF-kappa-B p105 subunit (DNA-binding factor KBF1) (EBP-1) (NF-kappa-B1 p84/NF-kappa-B1 p98) (Nuclear factor of kappa light polypeptide gene enhancer in B-cells 1) [Cleaved into: Nuclear factor NF-kappa-B p50 subunit]	Nfkb1	-0.100401	-0.8266	1.9294	1.2032	0.278335	0.248218	1	0.588995
GGNESDDLANGETpGGDR	1	T1466	Q8BI84	Melanoma inhibitory activity protein 3 (Transport and Golgi organization protein 1)	Mia3 Kiaa0268 Tango1	0.226639	-0.647673	1.9288	1.05449	0.266636	0.307623	1	0.638764
QGLCCIYpCK	1	Y301	F2Z409	Diacylglycerol kinase gamma	Dgkg	1.40019	-1.31748	1.92361	-0.794058	0.268075	0.695911	1	0.403156
GGQEPAGAGSpPSpPPEDR	2	S1010,S1012	F7BJK1	Protein Pcdh1 (Fragment)	Pcdh1	-0.404145	-1.44386	1.92122	0.881507	0.275923	0.204983	1	0.367588
EPMVAAVAALTDARDSpDSpSpDTDER	3	S264,S266,S267	Q8C6M1	Ubiquitin carboxyl-terminal hydrolase 20 (EC 3.4.19.12) (Deubiquitinating enzyme 20) (Ubiquitin thioesterase 20) (Ubiquitin-specific-processing protease 20) (VHL-interacting deubiquitinating enzyme 2)	Usp20 Kiaa1003 Vdu2	-0.177602	-0.851606	1.91696	1.24296	0.285878	0.244104	1	0.560584
ASSIDSASNTELQTpHDMSSDEK	1	T1011	E9Q3Y4	Lipopolysaccharide-responsive and beige-like anchor protein	Lrba	0.500939	-0.806094	1.91113	0.604102	0.281649	0.383797	1	0.595073
RRSpCDLAGVETCK	1	S247	A2RTH5	Leucine carboxyl methyltransferase 1 (Leucine carboxyl methyltransferase 1, isoform CRA_b) (Protein Lcmt1)	Lcmt1 mCG_20988	0.125399	-1.00144	1.90641	0.779574	0.272279	0.292717	1	0.50364
VEEQVEDSDDEEDDDSpHDDEEER	1	S239	Q8CGC6	RNA-binding protein 28 (RNA-binding motif protein 28)	Rbm28	1.15994	-0.505411	1.90011	0.234765	0.282725	0.607347	1	0.711144
FYpITKFK	1	Y438	A2AL49	Alkylglycerone-phosphate synthase (Alkyl-DHAP synthase) (EC 2.5.1.26)	Agps	-0.0605313	-0.404672	1.89959	1.55545	0.284737	0.279587	1	0.758874
SPSpGGEHAPSEDSGK	1	S636	Q9Z2C9	Myotubularin-related protein 7 (EC 3.1.3.-)	Mtmr7	0.36839	-0.514128	1.89763	1.01512	0.268903	0.346529	1	0.702891
GLVAAYSGESpDSEEEQER	1	S736	Q99KG3	RNA-binding protein 10 (RNA-binding motif protein 10)	Rbm10 Kiaa0122	0.14297	-0.383778	1.89167	1.36493	0.285199	0.29757	1	0.784526
TPGDFNYAYQKPENAAGSpPDEEDYDYESQEK	1	S1877	P14873	Microtubule-associated protein 1B (MAP-1B) (MAP1(X)) (MAP1.2) [Cleaved into: MAP1B heavy chain; MAP1 light chain LC1]	Map1b Mtap1b Mtap5	-0.834879	-1.25758	1.87341	1.4507	0.519199	0.125398	0.757744	0.309848
RIACEEEFSDSpDEEGEGGR	1	S423	D3YYI8	Histone deacetylase (EC 3.5.1.98)	Gm10093 mCG_128529	0.161179	-0.583398	1.87296	1.12838	0.280516	0.325416	1	0.667667
EEPLSpEEEPCTSTAVPSPEK	1	S509	Q6DFW4	Nucleolar protein 58 (MSSP) (Nucleolar protein 5) (SIK-similar protein)	Nop58 Nol5	0.123844	-0.567532	1.87074	1.17936	0.285906	0.303565	1	0.685722
SFSpQSpSTLFQHKK	2	S65,S67	F6VCZ4	Uncharacterized protein	Zfp422	0.647936	-0.612122	1.86857	0.608514	0.277299	0.492309	1	0.65894
ETVVESQSSQSPSpPK	1	S859	E9PZM7	Protein Scaf11	Scaf11	1.00745	-0.677225	1.86845	0.183776	0.282837	0.554637	1	0.630545
GLSVSGPCGSRSPQQTPMESp	1	S501	Q99LL5	Periodic tryptophan protein 1 homolog	Pwp1	0.304513	-0.476798	1.86509	1.08377	0.276459	0.340173	1	0.721213
QEPLGSDSpEGVNCLAYDEAIMAQQDR	1	S18	Q7TQI3	Ubiquitin thioesterase OTUB1 (EC 3.4.19.12) (Deubiquitinating enzyme OTUB1) (OTU domain-containing ubiquitin aldehyde-binding protein 1) (Otubain-1) (Ubiquitin-specific-processing protease OTUB1)	Otub1	-0.345899	-0.559284	1.86405	1.65067	0.276785	0.218414	1	0.689067
QRFLVDQGYSpFK	1	S687	P49135	TFIIH basal transcription factor complex helicase XPB subunit (EC 3.6.4.12) (Basic transcription factor 2 89 kDa subunit) (BTF2 p89) (DNA excision repair protein ERCC-3) (DNA repair protein complementing XP-B cells) (TFIIH 89 kDa subunit) (Xeroderma pigmentosum group B-complementing protein)	Ercc3 Xpb Xpbc	-0.636589	-0.448026	1.86043	2.049	0.278964	0.178873	1	0.73376
RAFLKVMGHSpR	1	S309	B1ARV2	Olfactory receptor 1328	Olfr1328	0.451462	-0.54631	1.85928	0.861511	0.276065	0.387281	1	0.696266
DLKPENLLYpATpPFEDSK	2	Y144,T146	A2ALM3	Calcium/calmodulin-dependent protein kinase type 1B (Fragment)	Pnck	0.340324	-0.510905	1.85847	1.00724	0.276221	0.350753	1	0.707812
AVEESSDSDSSFSpD	1	S193	Q9CR27	WASH complex subunit 3 (Coiled-coil domain-containing protein 53)	Washc3 Ccdc53	0.544645	-0.457749	1.85776	0.855365	0.276122	0.404795	1	0.728204
VRLGEIYpTKTpDSK	2	Y2168,T2171	E9PVD4	Protein Akap13 (Fragment)	Akap13	0.00593067	-0.615254	1.85673	1.23555	0.28196	0.290347	1	0.665994
VRLGEIYTpKTpDSK	2	T2169,T2171	E9PVD4	Protein Akap13 (Fragment)	Akap13	0.00593067	-0.615254	1.85673	1.23555	0.28196	0.290347	1	0.665994
QTMKTpQRCK	1	T82	P63089	Pleiotrophin (PTN) (Heparin-binding brain mitogen) (HBBM) (Heparin-binding growth factor 8) (HBGF-8) (Heparin-binding growth-associated molecule) (HB-GAM) (Heparin-binding neutrophic factor) (HBNF) (Osteoblast-specific factor 1) (OSF-1)	Ptn	-0.618686	-0.509823	1.85511	1.96398	0.280463	0.192524	1	0.715445
SNSQENVEASpHPSQDGK	1	S190	B2RUJ5	Amyloid-beta A4 precursor protein-binding family A member 1 (Adapter protein X11alpha) (Neuron-specific X11 protein) (Neuronal Munc18-1-interacting protein 1) (Mint-1)	Apba1 Mint1 X11	0.649093	-0.454212	1.85072	0.747413	0.279014	0.435084	1	0.72991
EPMVAAVAALTDARDSpDSpSpDTpDER	4	S264,S266,S267,T269	Q8C6M1	Ubiquitin carboxyl-terminal hydrolase 20 (EC 3.4.19.12) (Deubiquitinating enzyme 20) (Ubiquitin thioesterase 20) (Ubiquitin-specific-processing protease 20) (VHL-interacting deubiquitinating enzyme 2)	Usp20 Kiaa1003 Vdu2	-0.229713	-0.7562	1.84943	1.32294	0.296096	0.239761	1	0.592785
LTpYIEPR	1	T293	Q8K377	Leucine-rich repeat transmembrane neuronal protein 1	Lrrtm1	0.317373	-0.497108	1.84744	1.03296	0.28942	0.461695	1	0.708548
FQQPPQPEGEEDASpDGGR	1	S23	H3BKN0	tRNA (cytosine(34)-C(5))-methyltransferase	Nsun2	0.816558	-0.505726	1.84507	0.522788	0.279617	0.527887	1	0.717691
RFQQPPQPEGEEDASpDGGR	1	S23	H3BKN0	tRNA (cytosine(34)-C(5))-methyltransferase	Nsun2	0.384135	-0.584776	1.84164	0.872724	0.279424	0.375267	1	0.66958
AHSpPAEGASSESSSPGPK	1	S62	Q8QZS3	Folliculin	Flcn	0.362879	-0.52618	1.83914	0.950081	0.284303	0.362166	1	0.702147
FLQDTpIEEMALKNK	1	T266	Q9Z2I0	LETM1 and EF-hand domain-containing protein 1, mitochondrial (Leucine zipper-EF-hand-containing transmembrane protein 1)	Letm1	0.464329	-0.61325	1.83886	0.761277	0.285386	0.393295	1	0.673917
ADAPDAGAQSDSELPSYpHQNDVSpLDR	2	Y1251,S1257	Q6A099	MKIAA0248 protein (Prostaglandin E synthase 2) (Fragment)	Gbf1 mKIAA0248	-0.100284	-0.417265	1.83349	1.51651	0.292356	0.273448	1	0.751233
RAGDVLEDSpPK	1	S165	E0CXA0	Hepatoma-derived growth factor (Fragment)	Hdgf	0.798827	-0.698162	1.82619	0.329202	0.286226	0.493867	1	0.63424
ELLAIKAELQKRVEDLQREMATpR	1	S18	I7HJQ9	Myotubularin-related protein 1	Mtmr1	-1.18071	-0.604713	1.82487	2.40087	0.285947	0.131486	1	0.658032
EPMVAAVAALTpDARDSDSpSpDTDER	3	T259,S266,S267	Q8C6M1	Ubiquitin carboxyl-terminal hydrolase 20 (EC 3.4.19.12) (Deubiquitinating enzyme 20) (Ubiquitin thioesterase 20) (Ubiquitin-specific-processing protease 20) (VHL-interacting deubiquitinating enzyme 2)	Usp20 Kiaa1003 Vdu2	-0.639196	-0.733879	1.82439	1.7297	0.294291	0.194216	1	0.601537
EPMVAAVAALTpDARDSpDSpSDTDER	3	T259,S264,S266	Q8C6M1	Ubiquitin carboxyl-terminal hydrolase 20 (EC 3.4.19.12) (Deubiquitinating enzyme 20) (Ubiquitin thioesterase 20) (Ubiquitin-specific-processing protease 20) (VHL-interacting deubiquitinating enzyme 2)	Usp20 Kiaa1003 Vdu2	-0.639196	-0.733879	1.82439	1.7297	0.294291	0.194216	1	0.601537
GDQVSQNGLPAEQGSpPR	1	S2137	Q62261	Spectrin beta chain, non-erythrocytic 1 (Beta-II spectrin) (Embryonic liver fodrin) (Fodrin beta chain)	Sptbn1 Elf Spnb-2 Spnb2 Sptb2	0.220864	-0.61475	1.82233	0.986715	0.282787	0.332102	1	0.653759
RSpFKTYDK	1	S1457	Q6P1E8	EF-hand calcium-binding domain-containing protein 6 (DJ-1-binding protein) (DJBP)	Efcab6 Djbp Kiaa1672	0.939283	-0.539322	1.81851	0.339903	0.291553	0.544464	1	0.692113
IVTDYpKK	1	Y201	Q6P8K8	Carboxypeptidase A4 (EC 3.4.17.-)	Cpa4	0.974508	-0.900207	1.81668	-0.0580309	0.30373	0.573826	1	0.557496
NLDFLLQTpKNSpPK	2	T378,S381	Q91YL7	PGAP2-interacting protein (Cell wall biogenesis protein 43 C-terminal homolog)	Cwh43 Pgap2ip	-0.553822	-0.620295	1.81438	1.74791	0.285844	0.201224	1	0.660967
GLSVSGPCGSRSPQQTpPMES	1	T497	Q99LL5	Periodic tryptophan protein 1 homolog	Pwp1	0.152269	-0.58543	1.81081	1.07311	0.285533	0.317651	1	0.66872
SSESpVVDEDGGR	1	S159	E9Q8S5	Microtubule-associated serine/threonine-protein kinase 3	Mast3	0.608977	-0.687753	1.80426	0.507529	0.289135	0.43685	1	0.621304
AVEESSDSpDSSFSD	1	S188	Q9CR27	WASH complex subunit 3 (Coiled-coil domain-containing protein 53)	Washc3 Ccdc53	0.464445	-0.437691	1.80395	0.901811	0.287776	0.415208	1	0.73892
YpGDMRR	1	Y1058	Q5SRI3	Dedicator of cytokinesis protein 2	Dock2	0.791134	-0.406986	1.80065	0.602531	0.287973	0.499712	1	0.757304
DNSFITERMYpK	1	Y48	Q8BVK9	Sp110 nuclear body protein (Intracellular pathogen resistance protein 1)	Sp110 Ifi75 Ipr1	0.059897	-0.779076	1.79986	0.960887	0.304044	0.315275	1	0.603709
TPDGGHSpSpQEIK	2	S580,S581	Q5SVL6	Rap1 GTPase-activating protein 2 (Rap1GAP2) (GTPase-activating Rap/Ran-GAP domain-like protein 4)	Rap1gap2 Garnl4 Kiaa1039 Rap1ga2	0.681409	-0.505906	1.79722	0.609906	0.302251	0.52293	0.999697	0.747811
SDSpDVNNDR	1	S927	Q8BY87	Ubiquitin carboxyl-terminal hydrolase 47 (EC 3.4.19.12) (Deubiquitinating enzyme 47) (Ubiquitin thioesterase 47) (Ubiquitin-specific-processing protease 47)	Usp47	0.845838	-0.395063	1.79674	0.555842	0.294051	0.517521	1	0.760456
SpPSVSpSPEPTEK	2	S1683,S1687	Q8BTI8	Serine/arginine repetitive matrix protein 2	Srrm2 Kiaa0324	0.908148	-0.425299	1.79438	0.460937	0.30034	0.542327	1	0.744923
YpKELVEMVKAKK	1	Y596	E9Q9H2	DnaJ homolog subfamily C member 2	Dnajc2	-0.115847	-0.440487	1.79408	1.46944	0.293956	0.266345	1	0.746423
EDPAAEPGSpPR	1	S929	M0QWN7	Ubiquitin carboxyl-terminal hydrolase (EC 3.4.19.12)	Usp35	0.319073	-0.969074	1.78295	0.494802	0.29061	0.370256	1	0.510845
AFGESpSpTpESpDEDEEEGCSHK	4	S78,S79,T80,S82	A5A4Y9	Protein phosphatase 1 regulatory subunit 11 (TCTEX5 long isoform)	Ppp1r11	0.158644	-1.17133	1.78254	0.452568	0.310641	0.373187	1	0.469791
EASVTKRAQWGSpK	1	S518	P57016	Ladinin-1 (Lad-1) (Linear IgA disease antigen homolog) (LADA)	Lad1	-0.296022	-0.39504	1.78104	1.68202	0.295695	0.242457	1	0.7617
KQPNNILKEIKNSLRSpVQEK	1	S505	Q3UHZ5	Leiomodin-2 (Cardiac leiomodin) (C-LMOD) (Leiomodin)	Lmod2	-1.23428	-0.522178	1.78079	2.49289	0.292446	0.14067	1	0.696449
TpMKVTGIITQGVK	1	T2224	B2RRC9	Coagulation factor VIII (F8 protein)	F8	-0.525931	-0.392868	1.77829	1.91136	0.292948	0.202472	1	0.761627
EEVIPGSpPEPCPGQQAPGPEPSQPAQELTVQAPSpSPER	2	S225,S252	Q9JJ89	Coiled-coil domain-containing protein 86 (Cytokine-induced protein with coiled-coil domain) (mCyclon)	Ccdc86 Cyclon D19Ertd678e MNCb-4327	-0.0573024	-0.761154	1.77554	1.07169	0.292325	0.281993	1	0.590299
VLFEEEERSSpDSpSQQCSpSpEDEDIFEETAQVSPPR	4	S1844,S1846,S1851,S1852	Q3UGY8	Brefeldin A-inhibited guanine nucleotide-exchange protein 3	Arfgef3 Big3 D10Bwg1379e Kiaa1244	-0.164516	-0.431325	1.77308	1.50627	0.307688	0.26203	1	0.744616
HGTDLWIDSpMNSAPSHSPEK	1	S137	Q99K28	ADP-ribosylation factor GTPase-activating protein 2 (ARF GAP 2) (GTPase-activating protein ZNF289) (Zinc finger protein 289)	Arfgap2 Zfp289 Znf289	-0.312134	-0.58362	1.77304	1.50156	0.301343	0.238316	1	0.668947
AELGNSpGDWSQIADEVMSPK	1	S735	Q62468	Villin-1	Vil1 Vil	-0.534468	-0.804326	1.77262	1.50276	0.293708	0.20215	1	0.57331
GHPSAGAEEEGGSpDGSpAAEAEPR	2	S120,S123	Q8JZQ9	Eukaryotic translation initiation factor 3 subunit B (eIF3b) (Eukaryotic translation initiation factor 3 subunit 9) (eIF-3-eta) (eIF3 p116)	Eif3b Eif3s9	0.359817	-0.786702	1.77151	0.624989	0.311199	0.401031	1	0.580178
DTVIIVSpEPSpEDEESHDLPSVTR	2	S124,S127	Q04692	SWI/SNF-related matrix-associated actin-dependent regulator of chromatin subfamily A containing DEAD/H box 1 (EC 3.6.4.12) (ATP-dependent helicase SMARCAD1) (Enhancer trap locus homolog 1) (Etl-1)	Smarcad1 Etl1 Kiaa1122	-0.106957	-3.83074	1.77142	-1.95236	0.51812	0.239434	0.711189	0.0494817
SDDESPSTSSpGSSDADQRDPAAPEPEEQEER	1	S18	B2FDH0	Ubiquitin-conjugating enzyme E2 E3 (Fragment)	Ube2e3	0.633276	-0.434705	1.77069	0.70271	0.309891	0.454594	1	0.751733
LEDTSLRLKDEMDLYpKR	1	Y474	Q8BQP8	Rab11 family-interacting protein 4 (FIP4-Rab11) (Rab11-FIP4) (mRab11-FIP4A)	Rab11fip4 Kiaa1821	-0.116643	-0.393442	1.77051	1.49371	0.30223	0.279517	1	0.761379
GSLPPAALESSpDSpTNTTIEDEDAK	2	S356,S358	Q5SVI1	Calcium/calmodulin-dependent protein kinase type II subunit beta	Camk2b	0.318411	-0.572227	1.7704	0.879763	0.305637	0.36737	1	0.681955
GEGVSQVGPGTPPAPESpPR	1	S539	P58871	182 kDa tankyrase-1-binding protein	Tnks1bp1 Kiaa1741 Tab182	0.796702	-0.556287	1.76952	0.416528	0.293577	0.509888	1	0.680625
GPYpGLSGLKR	1	Y691	B2RQE8	Rho GTPase-activating protein 42 (Rho-type GTPase-activating protein 42)	Arhgap42 Graf3	-0.149918	-0.883012	1.76121	1.02812	0.298733	0.267207	1	0.543299
ETDPGSpPR	1	S944	Q8VDJ3	Vigilin (High density lipoprotein-binding protein) (HDL-binding protein)	Hdlbp	0.636757	-0.568886	1.75781	0.552163	0.29579	0.467468	1	0.674265
CSKECSpPGQMKK	1	S527	Q8K4Z6	G-protein coupled receptor family C group 6 member A	Gprc6a	-0.177845	-0.536833	1.75344	1.39446	0.296641	0.262745	1	0.702477
ASSIDSASpNTpELQTHDMSSDEK	2	S1005,T1007	E9Q3Y4	Lipopolysaccharide-responsive and beige-like anchor protein	Lrba	0.323243	-0.613619	1.75195	0.815086	0.29744	0.373856	1	0.663024
VDEDEDEDVEDDSpSpSpEEEK	3	S617,S618,S619	Q99K46	Ubiquitin carboxyl-terminal hydrolase 11 (EC 3.4.19.12) (Deubiquitinating enzyme 11) (Ubiquitin thioesterase 11) (Ubiquitin-specific-processing protease 11)	Usp11	0.397854	-1.02705	1.75084	0.325934	0.302486	0.391712	1	0.507508
RSpPTpPPPR	2	S591,T593	A2A8V8	Serine/arginine repetitive matrix protein 1	Srrm1	0.591557	-0.514791	1.74666	0.640309	0.302951	0.463709	1	0.700111
SpGRYpFALTDDSK	2	S74,Y77	E9Q156	tRNA (guanine-N(7)-)-methyltransferase non-catalytic subunit WDR4 (WD repeat-containing protein 4)	Wdr4 WDR4	0.50049	-0.697141	1.74655	0.548915	0.298083	0.465148	1	0.619489
LLCQEETpPEATEDERDEER	1	T429	Q5SW15	Methyltransferase-like protein (EC 2.1.1.-)	Mettl16	1.61741	-0.403484	1.74081	-0.280089	0.302458	0.918146	1	0.758835
EPMVAAVAALTDARDSDSpSpDTDER	2	S266,S267	Q8C6M1	Ubiquitin carboxyl-terminal hydrolase 20 (EC 3.4.19.12) (Deubiquitinating enzyme 20) (Ubiquitin thioesterase 20) (Ubiquitin-specific-processing protease 20) (VHL-interacting deubiquitinating enzyme 2)	Usp20 Kiaa1003 Vdu2	-0.592287	-0.668429	1.73833	1.66218	0.31625	0.218189	1	0.638337
KLYSFLRKTpQFTNPVGDR	1	T441	E9Q281	Vomeronasal 2, receptor 114	Vmn2r114	-0.487063	-0.740671	1.7352	1.4816	0.301086	0.215467	1	0.59903
EQLAVNQVNSpESDSDSpEESK	2	S1309,S1315	Q61687	Transcriptional regulator ATRX (EC 3.6.4.12) (ATP-dependent helicase ATRX) (HP1 alpha-interacting protein) (HP1-BP38 protein) (Heterochromatin protein 2) (X-linked nuclear protein)	Atrx Hp1bp2 Xnp	0.526797	-0.892277	1.73406	0.314982	0.302762	0.438539	1	0.543256
SQSHSQSpQSHSPSPPR	1	S523	Q8CFC7	CLK4-associating serine/arginine rich protein (Clk4-associating SR-related protein) (Serine/arginine-rich splicing factor 16) (Splicing factor, arginine/serine-rich 16) (Suppressor of white-apricot homolog 2)	Clasrp Clasp Sfrs16 Srsf16 Swap2	0.59539	-0.398392	1.73102	0.737241	0.301988	0.472693	1	0.759396
EHANIDAQSGSpQAPNPSTTISPGK	1	S358	E9PXF5	NAD-dependent protein deacetylase sirtuin-2	Sirt2	0.316615	-0.395644	1.72629	1.01403	0.302613	0.38095	1	0.762147
QASpPLISpPLLNDQACPR	2	S512,S516	F8VPU2	FERM, RhoGEF and pleckstrin domain-containing protein 1	Farp1	-0.447351	-1.0037	1.72436	1.16801	0.317046	0.22377	1	0.507444
TpVMIIVAISPK	1	T445	Q8N7N6	TRAF3-interacting protein 2 (cDNA fis, clone TRACH2006870,moderately similar to Homo sapiens adaptor protein CIKS mRNA)	Traf3ip2 mCG_1382	-0.374469	-0.993086	1.71991	1.10129	0.30358	0.237932	1	0.508102
AASpPQEVTPQADEK	1	S2369	E9QAE4	Histone-lysine N-methyltransferase (EC 2.1.1.43)	Whsc1l1	0.552387	-0.408508	1.71302	0.752123	0.310268	0.451981	1	0.754791
AASDGQYENQSPEATpSPR	1	T1066	E9Q0S6	Protein Tns1	Tns1	0.256458	-0.408817	1.71191	1.04664	0.305733	0.364831	1	0.762182
NNPLCTpHKNRRSQGK	1	T217	Q8BSA9	tRNA wybutosine-synthesizing protein 3 homolog (tRNA-yW-synthesizing protein 3) (EC 2.1.1.282) (tRNA(Phe) 7-((3-amino-3-carboxypropyl)-4-demethylwyosine(37)-N(4))-methyltransferase)	Tyw3	2.12549	-0.545097	1.71066	-0.95992	0.236275	1	0.752761	0.521692
YGPSSVEDTTpGSGAADAK	1	T88	O70251	Elongation factor 1-beta (EF-1-beta)	Eef1b Eef1b2	0.224058	-0.812887	1.70608	0.669135	0.314637	0.361507	1	0.616876
MDTESEEDDGHEWEDMDDEEGSpDDR	1	S196	Q6NSQ7	Protein LTV1 homolog	Ltv1	0.57849	-0.421374	1.704	0.704137	0.30694	0.467998	1	0.755017
QTEAECKGNYITYpK	1	Y1076	F7C376	Voltage-dependent L-type calcium channel subunit alpha-1C	Cacna1c	0.53343	-0.582345	1.70242	0.586641	0.322668	0.483405	1	0.680033
DSTVSSSETpP	1	T204	Q61160	FAS-associated death domain protein (FAS-associating death domain-containing protein) (Mediator of receptor induced toxicity) (Protein FADD)	Fadd Mort1	0.327889	-0.434459	1.69611	0.93376	0.311347	0.395875	1	0.74966
QVTpKQSpLSFR	2	T2164,S2167	Q61687	Transcriptional regulator ATRX (EC 3.6.4.12) (ATP-dependent helicase ATRX) (HP1 alpha-interacting protein) (HP1-BP38 protein) (Heterochromatin protein 2) (X-linked nuclear protein)	Atrx Hp1bp2 Xnp	0.685306	-0.482354	1.69538	0.527718	0.272286	0.595038	0.885499	0.628647
QTHCTpINSLSAEVRALK	1	T928	E9QQ10	A-kinase anchor protein 9	Akap9	0.910815	-0.882472	1.69335	-0.099934	0.307567	0.667017	0.99419	0.539508
LVELPVSSQPSpAEDSDTpEDDSEAEQGER	2	S1939,T1945	Q4U2R1	E3 ubiquitin-protein ligase HERC2 (EC 6.3.2.-) (HECT domain and RCC1-like domain-containing protein 2)	Herc2 Jdf2 Kiaa0393 Rjs	0.210112	-0.401807	1.69272	1.08081	0.309493	0.357847	1	0.757477
IFTpISEMSAK	1	T71	O54830	Prolactin-7A1 (Placental prolactin-like protein E) (PLP-E) (PRL-like protein E) (Placental prolactin-like protein G) (PLP-G) (PRL-like protein G)	Prl7a1 Prlpe Prlpg	-0.0641159	-0.831052	1.69219	0.925259	0.31633	0.305505	1	0.571084
AAQASpLNALNDPIAVEQALQEK	1	S933	E9Q6R7	Protein Utrn	Utrn	-0.669638	-0.472021	1.69103	1.88865	0.317586	0.239288	1	0.721218
EQIEVIAPSpPERSpR	2	S711,S715	E9QQ30	Eukaryotic translation initiation factor 2-alpha kinase 3	Eif2ak3	0.242205	-1.12849	1.68952	0.318821	0.326577	0.367041	1	0.466201
LLDYpCKSpK	2	Y205,S208	G3XA14	Protein Akr1cl (RIKEN cDNA 4921521F21, isoform CRA_a)	Akr1cl 4921521F21Rik mCG_123121	0.488196	-0.397542	1.68876	0.803017	0.310205	0.436365	1	0.7604
EPETGLDNTpSPK	1	T808	F6SLK1	Cyclin-G-associated kinase (Fragment)	Gak	0.438702	-0.596091	1.68545	0.650653	0.311105	0.430984	1	0.662789
EPACTYGNNVPLSpPVDGSNK	1	S770	B1AZ14	Cordon-bleu protein-like 1	Cobll1	-0.919881	-1.48859	1.6828	1.11409	0.397412	0.183706	1	0.375771
KRKRTpR	1	T131	Q8R4K8-2	Pappalysin-1	Pappa	0.0335452	-0.826651	1.68268	0.822481	0.315712	0.318832	1	0.57101
ESEYESpSpDEEDR	2	S248,S249	F6TN13	RNA-binding protein 40 (Fragment)	Rnpc3	0.853145	-0.93813	1.67382	-0.117458	0.323326	0.566355	1	0.522954
PGIVELPTpLEELK	1	T9	Q9DCJ5	NADH dehydrogenase [ubiquinone] 1 alpha subcomplex subunit 8 (Complex I-19kD) (CI-19kD) (Complex I-PGIV) (CI-PGIV) (NADH-ubiquinone oxidoreductase 19 kDa subunit)	Ndufa8	1.17651	-0.545894	1.67135	-0.0510562	0.315738	0.72421	1	0.686121
EQGVESPGAQPASpSpPR	2	S522,S523	Q6PAM1	Alpha-taxilin	Txlna Txln	-0.588794	-1.89671	1.66904	0.361125	0.340204	0.228774	1	0.271305
GSLPPAALESpSDSTNTTIEDEDAK	1	S355	Q5SVI1	Calcium/calmodulin-dependent protein kinase type II subunit beta	Camk2b	0.0944664	-0.558394	1.66544	1.01258	0.327198	0.33797	1	0.691469
KSVLATpTSpR	2	T490,S492	E9Q2I4	Protein Elmsan1	Elmsan1 C130039O16Rik	-0.233845	-0.422957	1.66322	1.47411	0.316595	0.269157	1	0.745978
QSCSGSpSpPR	2	S869,S870	Q8BTI8	Serine/arginine repetitive matrix protein 2	Srrm2 Kiaa0324	0.769857	-0.656001	1.66199	0.236134	0.324843	0.540829	1	0.636532
TDHGAEIVYpKSPVVSpGDTSPR	2	T686,S692	A2A5Y6	Microtubule-associated protein	Mapt	0.190686	-0.883772	1.6542	0.579737	0.324386	0.377149	1	0.55065
RPECSpSpSDTEK	2	S1088,S1089	Q61687	Transcriptional regulator ATRX (EC 3.6.4.12) (ATP-dependent helicase ATRX) (HP1 alpha-interacting protein) (HP1-BP38 protein) (Heterochromatin protein 2) (X-linked nuclear protein)	Atrx Hp1bp2 Xnp	-0.283566	-0.524415	1.65299	1.41214	0.31892	0.26168	1	0.697206
HSDTDSpDRREDDR	1	S345	Q8BU14	Translocation protein SEC62 (Translocation protein 1) (TP-1)	Sec62 Tloc1	0.465039	-0.490311	1.65257	0.697219	0.318116	0.447358	1	0.712705
EEIEKYpR	1	Y131	Q91YR7	Pre-mRNA-processing factor 6 (PRP6 homolog) (U5 snRNP-associated 102 kDa protein) (U5-102 kDa protein)	Prpf6	0.528341	-1.40501	1.65131	-0.282043	0.318475	0.459209	1	0.37766
QQKGVLKLEESpMK	1	S107	Q9CQS7	Developmental pluripotency-associated protein 5A (mDppa5) (ES cell-associated transcript 2 protein) (Embryonal stem cell-specific gene 1 protein) (ESG-1) (Protein pH 34)	Dppa5a Dppa5 Ecat2 Esg1 Ph34	-0.260582	-0.616637	1.65114	1.29509	0.319109	0.271038	1	0.654877
PAQSASpSPEATSGSAGPVEK	1	S560	D3Z197	Histone-lysine N-methyltransferase (EC 2.1.1.43)	Whsc1l1	-0.153208	-0.46992	1.64828	1.33157	0.319205	0.288216	1	0.727975
GSLPPAALESSpDSTpNTTIEDEDAK	2	S356,T359	Q5SVI1	Calcium/calmodulin-dependent protein kinase type II subunit beta	Camk2b	0.232148	-0.471511	1.64827	0.944615	0.326017	0.37592	1	0.729099
IDFFSALEKFVELSpQETpR	2	S663,T666	Q5SW75	Protein phosphatase Slingshot homolog 2 (EC 3.1.3.16) (EC 3.1.3.48) (SSH-like protein 2) (SSH-2L) (mSSH-2L)	Ssh2 Kiaa1725 Ssh2l	-0.474416	-0.925337	1.64634	1.19542	0.32078	0.230104	1	0.527275
VLFEEEERSSpDSpSpQQCSSpEDEDIFEETAQVSPPR	4	S1844,S1846,S1847,S1852	Q3UGY8	Brefeldin A-inhibited guanine nucleotide-exchange protein 3	Arfgef3 Big3 D10Bwg1379e Kiaa1244	-0.16593	-0.435479	1.6463	1.37676	0.335117	0.285035	1	0.742215
KDMVDIKYpR	1	Y1483	Q5H8C4	Vacuolar protein sorting-associated protein 13A (Chorea-acanthocytosis protein homolog) (Chorein)	Vps13a Chac Kiaa0986	-0.437374	-0.729744	1.64406	1.3517	0.324637	0.241016	1	0.604171
DSGLEDGRESPSFDTpPSQR	1	T94	B1AWV9	Anion exchange protein	Slc4a10	1.1762	-1.38112	1.63932	-0.917994	0.362083	0.709372	0.897877	0.377278
VEQLVLYpMK	1	Y889	Q9QY01	Serine/threonine-protein kinase ULK2 (EC 2.7.11.1) (Serine/threonine-protein kinase Unc51.2) (Unc-51-like kinase 2)	Ulk2 Kiaa0623	-0.524974	-0.480105	1.63623	1.6811	0.322054	0.225459	1	0.718649
DHSSpQSEEEVVEGEK	1	S117	Q91Z78	BCL2/adenovirus E1B 19 kDa protein-interacting protein 3-like (MCG2480, isoform CRA_b) (SNix)	Bnip3l mCG_2480	0.472197	-0.645082	1.63591	0.518633	0.325312	0.446382	1	0.640141
VPTTVEDRVSDCTpPAVEK	1	T435	A2ATI9	Golgi reassembly stacking protein 2, isoform CRA_d (Golgi reassembly-stacking protein 2)	Gorasp2 mCG_12970	0.0315393	-0.4961	1.63569	1.10806	0.321873	0.329111	1	0.709626
KLLDYpCESpKDIVLVAYGALGTQR	2	Y205,S208	Q8VC28	Aldo-keto reductase family 1 member C13 (EC 1.1.1.-)	Akr1c13	-0.199538	-0.389347	1.62928	1.43947	0.337943	0.300752	1	0.767528
KTNEKTpR	1	T95	D3YWB4	Rab5 GDP/GTP exchange factor (Fragment)	Rabgef1	-0.0546294	-0.658574	1.61917	1.01523	0.334018	0.315283	1	0.636963
GEEDGPEERSpGDETPGSEAPGDK	1	S159	Q00PI9	Heterogeneous nuclear ribonucleoprotein U-like protein 2 (MLF1-associated nuclear protein)	Hnrnpul2 Hnrpul2 Manp	0.303956	-0.435337	1.61898	0.879686	0.327345	0.403543	1	0.744394
EKYLTpQK	1	T875	Q6P9J9	Anoctamin-6 (Small-conductance calcium-activated nonselective cation channel) (SCAN channel) (Transmembrane protein 16F)	Ano6 Tmem16f	0.32057	-0.523328	1.61719	0.773288	0.325971	0.407121	1	0.696918
RSpYSSPDITQALQEEEK	1	S678	A2AI52	Ubiquitin carboxyl-terminal hydrolase (EC 3.4.19.12)	Usp8	-0.223188	-0.405316	1.61712	1.43499	0.327349	0.27977	1	0.75703
DADSpQNPDAPEGK	1	S402	F8WHL2	Coatomer subunit alpha	Copa	-0.917236	-1.85031	1.61354	0.680459	0.353059	0.175297	1	0.277349
HPNGTKNSpNKPYpR	2	S152,Y156	B2RW07	Ataxin 7-like 1 (Ataxin-7-like protein 1)	Atxn7l1	0.40411	-0.579371	1.61311	0.629634	0.32933	0.434983	1	0.669635
KPTpSPVKPMPQNTpEYRTR	2	T1771,T1781	B2RUG9	Adenomatosis polyposis coli (Adenomatosis polyposis coli, isoform CRA_a) (Adenomatous polyposis coli protein)	Apc mCG_121500	-1.22898	-0.832192	1.61141	2.0082	0.327422	0.139816	1	0.562652
GHAPSTAAPAPSPAPMSSSpVQSDEERQPR	1	S42	Q8C996	Transmembrane protein 163 (Synaptic vesicle membrane protein of 31 kDa)	Tmem163 Sv31	0.357882	-0.552616	1.60642	0.695922	0.332004	0.422125	1	0.686086
ALQEGEGDLSISpADR	1	S390	Q9ER72	Cysteine--tRNA ligase, cytoplasmic (EC 6.1.1.16) (Cysteinyl-tRNA synthetase) (CysRS)	Cars	0.286327	-0.534858	1.60416	0.782977	0.341819	0.420506	1	0.692293
IRDRSpKMK	1	S150	H3BJT2	Insulin-like growth factor-binding protein 4 (Fragment)	Igfbp4	-0.361856	-0.562418	1.60169	1.40112	0.34231	0.264357	1	0.688206
YpKKFDEFFK	1	Y102	P51655	Glypican-4 (K-glypican) [Cleaved into: Secreted glypican-4]	Gpc4	-0.479743	-0.684757	1.59915	1.39413	0.333853	0.254201	1	0.625895
SDVSDIGSDNCSpLADEEQTPR	1	S632	Q3UGY8	Brefeldin A-inhibited guanine nucleotide-exchange protein 3	Arfgef3 Big3 D10Bwg1379e Kiaa1244	0.284496	-0.40391	1.59682	0.908417	0.33182	0.406871	1	0.757286
TVVGPSVAPGNTAPSPSSPTpSPTPDGTASSEMNNPHAIPR	1	T243	Q05BE7	Numb protein (Protein numb homolog)	Numb	-0.041153	-0.855298	1.59418	0.780037	0.336729	0.334564	1	0.55831
GHAPSTAAPAPSPAPMSSpSVQSDEERQPR	1	S41	Q8C996	Transmembrane protein 163 (Synaptic vesicle membrane protein of 31 kDa)	Tmem163 Sv31	0.388007	-0.465106	1.59404	0.740928	0.331858	0.43689	1	0.725165
GSLPPAALESpSDSTpNTTIEDEDAK	2	S355,T359	Q5SVI1	Calcium/calmodulin-dependent protein kinase type II subunit beta	Camk2b	0.124531	-0.407632	1.59353	1.06137	0.349224	0.377491	1	0.769898
YpKQDVYLLPK	1	Y560	E9PV16	Adenosylhomocysteinase	Ahcyl2	-0.030724	-0.676759	1.59325	0.947216	0.333969	0.332016	1	0.629563
NNHFSTpMTK	1	T322	Q6PDI6	Protein FAM63B	Fam63b Kiaa1164	0.556711	-0.601696	1.59023	0.431825	0.332438	0.488592	1	0.659116
LFKDTPLFSWYpTpK	2	Y135,T136	Q14BT6	Alpha-1,4-N-acetylglucosaminyltransferase (Alpha4GnT) (EC 2.4.1.-)	A4gnt	-0.256708	-0.51375	1.59009	1.33305	0.334976	0.283183	1	0.700526
TQEISRPNSpPSpEGEGESpSpDSR	4	S679,S681,S687,S688	A2A7T3	Arginine-glutamic acid dipeptide repeats protein	Rere	-0.0347838	-0.936181	1.58868	0.68728	0.335098	0.329858	1	0.538322
DKMWYpLAKMIR	1	Y83	Q8BU88	39S ribosomal protein L22, mitochondrial (L22mt) (MRP-L22)	Mrpl22	-0.393978	-0.617543	1.58515	1.36159	0.336839	0.257447	1	0.656562
QIYpKELPK	1	Y162	E9PWT1	Transformation/transcription domain-associated protein	Trrap	-0.288859	-0.760677	1.58429	1.11247	0.345283	0.290986	1	0.604906
AQSASpVESpIPEVLEECTSPADHSDSASVHDMDYVNPR	2	S295,S298	Q6A099	MKIAA0248 protein (Prostaglandin E synthase 2) (Fragment)	Gbf1 mKIAA0248	-0.493266	-0.432134	1.58298	1.64412	0.344335	0.247676	1	0.74125
QFHDSpK	1	S148	F6YJW4	60S ribosomal protein L18a	Gm17541	-0.0133804	-0.404061	1.58255	1.19187	0.335926	0.334309	1	0.756057
KTVETEELKNKQTpKFLEEIK	1	T294	A2AL36	Centriolin (Centrosomal protein 1) (Centrosomal protein of 110 kDa) (Cep110)	Cntrl Cep1 Cep110	-0.620542	-1.2589	1.5781	0.939733	0.496378	0.315486	1	0.543339
EPETGLDNTSpPK	1	S809	F6SLK1	Cyclin-G-associated kinase (Fragment)	Gak	0.227208	-0.5036	1.57668	0.84587	0.339732	0.412653	1	0.714977
ELEQHIQTSDPENFQSpEERSDSDVNNDR	1	S921	Q8BY87	Ubiquitin carboxyl-terminal hydrolase 47 (EC 3.4.19.12) (Deubiquitinating enzyme 47) (Ubiquitin thioesterase 47) (Ubiquitin-specific-processing protease 47)	Usp47	-0.404459	-0.391819	1.57662	1.58926	0.337894	0.254746	1	0.770954
AAETPAVASpCWSGPQVSPEHK	1	S1261	Q8BTI8	Serine/arginine repetitive matrix protein 2	Srrm2 Kiaa0324	0.500686	-0.465509	1.57508	0.608889	0.349576	0.478341	1	0.729141
IYpFLEERMQQK	1	Y27	E9Q1A0	Myomegalin	Pde4dip	-0.407562	-0.629795	1.571	1.34876	0.347782	0.274934	1	0.687157
HGTDLWLDSCAAPPVSpPPPK	1	S145	Q9D8S3	ADP-ribosylation factor GTPase-activating protein 3 (ARF GAP 3)	Arfgap3	-0.160202	-0.813413	1.56988	0.916665	0.338243	0.302094	1	0.570424
TLTDEVNSpPDSDR	1	S283	Q3UID0	SWI/SNF complex subunit SMARCC2	Smarcc2	0.442169	-0.388389	1.56437	0.733808	0.342607	0.466978	1	0.763985
CPEILSDESpSSDEDEK	1	S234	D3YVJ6	Protein DEK (Fragment)	Dek	0.257126	-0.461433	1.56384	0.845285	0.339649	0.406098	1	0.726307
EKEIQKSpQSpAK	2	S280,S282	O88958	Glucosamine-6-phosphate isomerase 1 (EC 3.5.99.6) (Glucosamine-6-phosphate deaminase 1) (GNPDA 1) (GlcN6P deaminase 1) (Oscillin)	Gnpda1 Gnpi	0.038847	-0.55407	1.56254	0.969627	0.346795	0.359346	1	0.692926
RLEDEQPPTLSpPK	1	S711	E9Q9P4	Calcium-activated potassium channel subunit alpha-1	Kcnma1	1.04612	-0.967602	1.55762	-0.4561	0.357611	0.730607	0.968628	0.52535
HRDILQDYpTHEFHKTpK	2	Y118,T125	O88630	Golgi SNAP receptor complex member 1 (28 kDa Golgi SNARE protein) (28 kDa cis-Golgi SNARE p28) (GOS-28)	Gosr1 Gs28	-0.358149	-1.3382	1.55135	0.571299	0.353405	0.321562	1	0.446995
IEEVSpALESSVKETLEYpVTDEYNK	2	S38,Y50	Q9D269	Cystatin-11	Cst11	-0.15146	-0.489017	1.55004	1.21248	0.351144	0.310303	1	0.713934
EVAGTRVYDERKEESpISLMK	1	S175	Q9CW03	Structural maintenance of chromosomes protein 3 (SMC protein 3) (SMC-3) (Basement membrane-associated chondroitin proteoglycan) (Bamacan) (Chondroitin sulfate proteoglycan 6) (Chromosome segregation protein SmcD) (Mad member-interacting protein 1)	Smc3 Bam Bmh Cspg6 Mmip1 Smc3l1 Smcd	-0.565261	-0.676294	1.54594	1.43491	0.359315	0.231498	1	0.625989
GIPLPTGDTSpPEPELLPGDPLPPPK	1	S42	Q9Z1D1	Eukaryotic translation initiation factor 3 subunit G (eIF3g) (Eukaryotic translation initiation factor 3 RNA-binding subunit) (eIF-3 RNA-binding subunit) (Eukaryotic translation initiation factor 3 subunit 4) (eIF-3-delta) (eIF3 p42) (eIF3 p44)	Eif3g Eif3p42 Eif3s4	0.431749	-0.411824	1.54497	0.701398	0.347893	0.463081	1	0.752797
YpFDALVK	1	Y52	F8VQ29	Protein Iqgap3	Iqgap3	0.847479	-0.776788	1.54473	-0.0795356	0.345698	0.636012	1	0.584652
RVSSDEEHTpVDSpCIGDIK	2	T3401,S3404	F6SZG2	Ubiquitin carboxyl-terminal hydrolase	Usp34	0.142526	-0.930894	1.5446	0.471179	0.347915	0.381947	1	0.524533
EVRDEADAQSpSpDEC	2	S546,S547	E9PZ54	GRINL1A complex locus	Gcom1	0.244629	-0.508268	1.54307	0.790172	0.352645	0.415885	1	0.703712
LECELESEDPDKGGNESpDDLANGETGGDR	1	S1458	Q8BI84	Melanoma inhibitory activity protein 3 (Transport and Golgi organization protein 1)	Mia3 Kiaa0268 Tango1	-0.0759284	-0.443425	1.54278	1.17528	0.343241	0.326454	1	0.735888
TpLWSpLVAFPK	2	T633,S636	E9PV12	Cullin-5	Cul5	2.54385	-0.503351	1.54005	-1.50715	0.175203	1	0.504076	0.367341
LACQADSVEQVDDTILTp	1	T2671	E9PVA8	Protein Gcn1l1	Gcn1l1	-0.0682098	-0.786203	1.53949	0.821501	0.356688	0.329678	1	0.581288
GGTEPSPLNENSTDEGSpER	1	S2862	Q8BYH8	Chromodomain-helicase-DNA-binding protein 9 (CHD-9) (EC 3.6.4.12) (ATP-dependent helicase CHD9) (PPAR-alpha-interacting complex protein 320 kDa) (Peroxisomal proliferator-activated receptor A-interacting complex 320 kDa protein)	Chd9 Kiaa0308 Pric320	0.469786	-0.414805	1.53886	0.654267	0.349398	0.476625	1	0.750519
EQGVESpPGAQPASpSPR	2	S515,S522	Q6PAM1	Alpha-taxilin	Txlna Txln	1.02519	-0.650541	1.53735	-0.13838	0.346088	0.741474	0.991159	0.631486
SNECLVSDSPEGSpPALSPSp	1	S440	O08576	RUN domain-containing protein 3A (Rap2-interacting protein 8) (RPIP-8)	Rundc3a Rap2ip Rpip8	0.00735578	-0.828072	1.53274	0.697314	0.351707	0.350365	1	0.563457
KVPVPEGLDLDAWINEPPSDSpESEDEKPK	1	S634	O54774	AP-3 complex subunit delta-1 (AP-3 complex subunit delta) (Adaptor-related protein complex 3 subunit delta-1) (Delta-adaptin) (mBLVR1)	Ap3d1 Ap3d	-0.7277	-1.17956	1.53119	1.07932	0.444791	0.257169	1	0.500652
GSDIDNPTLTVTDISpPPSRSPR	1	S344	G5E8L8	Mitogen activated protein kinase kinase kinase 2 (Mitogen-activated protein kinase kinase kinase 2)	Map3k2 mCG_127139	0.00870045	-0.869512	1.52207	0.643853	0.355775	0.354591	1	0.552213
EEAPLEPSCSPGADHAAGEITpSEIQNEK	1	T391	Q3UZA1	CapZ-interacting protein (Protein kinase substrate CapZIP)	Rcsd1 Capzip	0.00611883	-0.771549	1.52156	0.743892	0.34832	0.353495	1	0.588613
RQLSSSSGNTpDAQAEEDER	1	T1296	D3Z2Z1	CAP-Gly domain-containing linker protein 1	Clip1	0.308304	-0.899978	1.52054	0.31226	0.350603	0.454212	1	0.536481
TVVGPSVAPGNTAPSPSpSPTSPTPDGTASSEMNNPHAIPR	1	S240	Q05BE7	Numb protein (Protein numb homolog)	Numb	0.0216066	-0.583207	1.51758	0.912762	0.349869	0.361133	1	0.670624
TVVGPSVAPGNTAPSPSSpPTSPTPDGTASSEMNNPHAIPR	1	S241	Q05BE7	Numb protein (Protein numb homolog)	Numb	0.0216066	-0.583207	1.51758	0.912762	0.349869	0.361133	1	0.670624
GSISSVDGESCNGSpNDR	1	S478	Q8K0F1	TBC1 domain family member 23	Tbc1d23	0.28772	-0.538887	1.51292	0.686315	0.354718	0.43499	1	0.689178
KAYpEELFWR	1	Y115	Q3TVP5	Inactive ubiquitin thioesterase FAM105A	Fam105a	-0.0745444	-0.601485	1.51168	0.984743	0.352238	0.342059	1	0.660027
PQELTDQDQSQEESQEGEEGEEGEEGEEGEEDSASEVTpK	1	T284	P16014	Secretogranin-1 (Chromogranin-B) (CgB) (Secretogranin I) (SgI) [Cleaved into: CCB peptide; PE-11]	Chgb Scg-1 Scg1	0.144814	-0.47608	1.50857	0.887681	0.361398	0.436718	1	0.723109
VYELIDALSpK	1	S332	Q80Y56	Rabenosyn-5 (FYVE finger-containing Rab5 effector protein rabenosyn-5) (RAB effector RBSN) (Zinc finger FYVE domain-containing protein 20)	Rbsn Zfyve20	1.56127	-0.483268	1.50822	-0.536322	0.257282	0.767979	0.748977	0.56013
ALASETNGTDSpNGSNSSNIQ	1	S512	P63328	Serine/threonine-protein phosphatase 2B catalytic subunit alpha isoform (EC 3.1.3.16) (CAM-PRP catalytic subunit) (Calmodulin-dependent calcineurin A subunit alpha isoform)	Ppp3ca Calna	0.352563	-0.697678	1.50488	0.454642	0.359401	0.450812	1	0.61698
HKRTHTGEKPYpECKRCGKAFAR	1	Y215	A2ARV7	Predicted gene 14401	Gm14401	-0.337294	-2.00582	1.4996	-0.168923	0.532057	0.200678	0.756317	0.185396
LEETpYTNK	1	T346	P54869	Hydroxymethylglutaryl-CoA synthase, mitochondrial (HMG-CoA synthase) (EC 2.3.3.10) (3-hydroxy-3-methylglutaryl coenzyme A synthase)	Hmgcs2	0.555769	-0.382317	1.49959	0.561501	0.356713	0.528569	1	0.768371
EEAPLEPSCSpPGADHAAGEITSEIQNEK	1	S380	Q3UZA1	CapZ-interacting protein (Protein kinase substrate CapZIP)	Rcsd1 Capzip	-0.0919449	-0.717554	1.49951	0.873901	0.354294	0.338801	1	0.611384
WNFKKMVSpYK	1	S263	Q5RKZ7	Molybdenum cofactor biosynthesis protein 1 [Includes: Cyclic pyranopterin monophosphate synthase (EC 4.1.99.18) (Molybdenum cofactor biosynthesis protein A); Cyclic pyranopterin monophosphate synthase accessory protein (Molybdenum cofactor biosynthesis protein C)]	Mocs1	-0.154989	-0.45602	1.4977	1.19667	0.354133	0.318736	1	0.729289
WNFKKMVSYpK	1	Y264	Q5RKZ7	Molybdenum cofactor biosynthesis protein 1 [Includes: Cyclic pyranopterin monophosphate synthase (EC 4.1.99.18) (Molybdenum cofactor biosynthesis protein A); Cyclic pyranopterin monophosphate synthase accessory protein (Molybdenum cofactor biosynthesis protein C)]	Mocs1	-0.154989	-0.45602	1.4977	1.19667	0.354133	0.318736	1	0.729289
KTTpLIRFFNGDMKK	1	T290	D3Z452	T-complex protein 10b (Fragment)	Tcp10b Gm10326 Tcp10a	0.0814812	-0.535013	1.49335	0.876854	0.36785	0.397949	1	0.69586
QVSpSpRAEK	2	S175,S176	P43021	Nodal	Nodal	0.0992322	-0.737216	1.48926	0.652809	0.359788	0.391114	1	0.618016
SPHSNPDTpAGEEDEEEPEMPVGPR	1	T842	F7C376	Voltage-dependent L-type calcium channel subunit alpha-1C	Cacna1c	1.92587	-0.571237	1.48781	-1.0093	0.26364	1	0.740391	0.499502
EQGVESPGAQPASpSPR	1	S522	Q6PAM1	Alpha-taxilin	Txlna Txln	0.093006	-1.0046	1.48766	0.390055	0.35953	0.383181	1	0.49865
RVSSpDEEHTpVDSCIGDIK	2	S3396,T3401	F6SZG2	Ubiquitin carboxyl-terminal hydrolase	Usp34	-0.296366	-0.971886	1.48749	0.811967	0.39783	0.301284	1	0.51489
IDLVKYYpISpK	2	Y109,S111	Q3TRB3	Palmitoyltransferase ZDHHC17	Zdhhc17	-0.0138324	-0.476771	1.48735	1.02441	0.356698	0.354619	1	0.730631
GSLISTDSpGNSpLPDRNPEK	2	S1270,S1273	E9QMR2	Dedicator of cytokinesis protein 9	Dock9	-0.0906837	-0.837566	1.483	0.736118	0.361891	0.336603	1	0.567665
YpQSSLSSTEK	1	Y778	Q9EQH2	Endoplasmic reticulum aminopeptidase 1 (EC 3.4.11.-) (ARTS-1) (Adipocyte-derived leucine aminopeptidase) (A-LAP) (Aminopeptidase PILS) (Puromycin-insensitive leucyl-specific aminopeptidase) (PILS-AP) (VEGF-induced aminopeptidase)	Erap1 Appils Arts1	0.261781	-0.520112	1.48078	0.698882	0.358339	0.430977	1	0.698276
LEMDTpELSQFYK	1	T169	Q8JZS6	NEDD4-binding protein 2-like 2 (Phosphonoformate immuno-associated protein 5 homolog)	N4bp2l2 Pfaap5	0.425556	-0.471697	1.48048	0.583224	0.369599	0.521808	1	0.726001
KTQDADRTpLK	1	T1253	P70208	Plexin-A3	Plxna3	-0.0642551	-0.633473	1.47991	0.910691	0.358538	0.34598	1	0.647142
AQSSEVPLSpPASpPR	2	S1550,S1553	Q80XP9	Serine/threonine-protein kinase WNK3 (EC 2.7.11.1) (Protein kinase lysine-deficient 3) (Protein kinase with no lysine 3)	Wnk3	0.51517	-0.641349	1.47216	0.315645	0.365457	0.5393	1	0.655066
KTLVTSpK	1	S528	Q6NS46	Protein RRP5 homolog (Apoptosis-linked gene 4 protein) (Programmed cell death protein 11)	Pdcd11 Alg4 Kiaa0185	-0.018309	-0.87466	1.47082	0.61447	0.367263	0.356711	1	0.560336
PQGMFAPPQVSpSPVQEK	1	S650	A2API8	A-kinase anchor protein 2	Akap2	-0.0948382	-0.728733	1.47069	0.836797	0.360983	0.338831	1	0.60572
CSDSQSWEGVAPEEEPCAENRLDTpPEEK	1	T796	A2AU89	Tumor suppressor p53-binding protein 1	Trp53bp1	-1.08808	-1.19769	1.46997	1.36037	0.405967	0.174903	1	0.462531
TGTLTSpQRDR	1	S3465	P55200	Histone-lysine N-methyltransferase 2A (Lysine N-methyltransferase 2A) (EC 2.1.1.43) (ALL-1) (Myeloid/lymphoid or mixed-lineage leukemia) (Myeloid/lymphoid or mixed-lineage leukemia protein 1) (Zinc finger protein HRX) [Cleaved into: MLL cleavage product N320 (N-terminal cleavage product of 320 kDa) (p320); MLL cleavage product C180 (C-terminal cleavage product of 180 kDa) (p180)]	Kmt2a All1 Hrx Mll Mll1	0.735018	-0.452187	1.46836	0.281156	0.362498	0.602804	1	0.732569
HSASDPGPAPVVNSSpSpR	2	S616,S617	J3KMH5	Melanoma inhibitory activity protein 3	Mia3	0.269908	-0.484665	1.46819	0.713613	0.361505	0.436108	1	0.714733
DLGHPVEEEDESpGDQEDDDDEIDDGDK	1	S940	Q9Z1Z0	General vesicular transport factor p115 (Protein USO1 homolog) (Transcytosis-associated protein) (TAP) (Vesicle-docking protein)	Uso1 Vdp	-0.383262	-0.77269	1.46724	1.07781	0.373472	0.306169	1	0.585691
QLLSpDYpCLEMKK	2	S40,Y42	D6RHQ0	Protein SCAI	Scai	-0.0524224	-1.34462	1.46568	0.173486	0.497913	0.488313	1	0.525056
RMSESYpRYpRDQRYpR	3	Y409,Y411,Y416	G5E8E4	RIKEN cDNA B930008K04 (Zinc finger matrin-type protein 1)	Zmat1 B930008K04Rik mCG_115070	2.24216	-0.693094	1.46389	-1.47136	0.228658	1	0.589566	0.369279
DHSSQSpEEEVVEGEK	1	S119	Q91Z78	BCL2/adenovirus E1B 19 kDa protein-interacting protein 3-like (MCG2480, isoform CRA_b) (SNix)	Bnip3l mCG_2480	0.482871	-0.442624	1.46231	0.53682	0.362915	0.511859	1	0.738229
GGEATWSGSEFEISpFPDSPGAQAQADHLPR	1	S372	Q91X51	Golgi reassembly-stacking protein 1 (Golgi peripheral membrane protein p65) (Golgi reassembly-stacking protein of 65 kDa) (GRASP65)	Gorasp1	-0.342513	-0.641621	1.46134	1.16223	0.363171	0.286824	1	0.641899
AGDLISETKYpK	1	Y1409	Q80XB4-3	Nebulin-related-anchoring protein	Nrap	0.0969094	-0.495238	1.46073	0.868583	0.37065	0.392782	1	0.721329
QPSpGHRLR	1	S4	Q91WU6	Palmitoyltransferase ZDHHC7 (EC 2.3.1.225) (GABA-A receptor-associated membrane protein 2) (Zinc finger DHHC domain-containing protein 7) (DHHC-7)	Zdhhc7 Gramp2	0.458945	-0.840206	1.46019	0.161037	0.368589	0.507743	1	0.559404
YpNDPIYVKLEK	1	Y328	H3BIY9	AP complex subunit beta	Ap2b1	0.244177	-0.499519	1.45905	0.715351	0.378843	0.441088	1	0.72555
ELESGTEESpDEEPTpPSPR	2	S454,T459	O08648	Mitogen-activated protein kinase kinase kinase 4 (EC 2.7.11.25) (MAPK/ERK kinase kinase 4) (MEK kinase 4) (MEKK 4)	Map3k4 Mekk4	0.0664974	-0.778545	1.45883	0.613784	0.36605	0.3862	1	0.582957
SYSSpPDITQALQEEEK	1	S681	A2AI52	Ubiquitin carboxyl-terminal hydrolase (EC 3.4.19.12)	Usp8	0.910494	-0.469596	1.45833	0.078244	0.371585	0.684205	1	0.722542
SLSTSpGESLYHVLGLDK	1	S12	A2AUE1	DnaJ homolog subfamily C member 5 (Fragment)	Dnajc5	-0.29871	-0.981837	1.44878	0.765654	0.436939	0.370605	1	0.583526
GEGVSQVGPGTpPPAPESPR	1	T533	P58871	182 kDa tankyrase-1-binding protein	Tnks1bp1 Kiaa1741 Tab182	0.650506	-0.573906	1.44807	0.223654	0.368606	0.575392	1	0.6734
GHKVTKNVSpK	1	S22	D3YW41	60S ribosomal protein L36	Rpl36-ps3	-1.01414	-0.443366	1.44524	2.01602	0.368556	0.186596	1	0.750356
ATpSpLYYSK	2	T422,S423	Q91WC1	Protection of telomeres protein 1 (mPot1) (POT1-like telomere end-binding protein)	Pot1 Pot1a	0.0266307	-0.450323	1.44516	0.968205	0.368276	0.37544	1	0.738928
HTLGGPRSpSpK	2	S74,S75	A2AQ25	Sickle tail protein (Enhancer trap locus 4)	Skt Etl4 Kiaa1217	0.903222	-0.426425	1.44489	0.115239	0.366823	0.716337	0.973017	0.761905
GLYDGPVCEVSpVTPK	1	S507	O08553	Dihydropyrimidinase-related protein 2 (DRP-2) (Unc-33-like phosphoprotein 2) (ULIP-2)	Dpysl2 Crmp2 Ulip2	0.727917	-0.713078	1.44421	0.00321033	0.367524	0.61775	1	0.612061
ENPPSPPTSpPAAPQPR	1	S71(87,103)	Q8BP27	Swi5-dependent recombination DNA repair protein 1 homolog (Meiosis protein 5 homolog)	Sfr1 Mei5 Meir5	0.282857	-0.876089	1.44327	0.284325	0.375305	0.4476	1	0.547769
EAAEAEPAEPSpSPAAEAEGASASSTSSPK	1	S112	P26645	Myristoylated alanine-rich C-kinase substrate (MARCKS)	Marcks Macs	-0.11202	-1.00546	1.44296	0.549522	0.377502	0.347224	1	0.500526
EAAEAEPAEPSSPAAEAEGASASSTSpSPK	1	S127	P26645	Myristoylated alanine-rich C-kinase substrate (MARCKS)	Marcks Macs	-0.11202	-1.00546	1.44296	0.549522	0.377502	0.347224	1	0.500526
QAPQAAGDSSpSpDSpDSpSSSEEEEK	4	S474,S475,S477,S479	E9Q5C9	Protein Nolc1	Nolc1	0.0881846	-0.472175	1.43618	0.875819	0.344358	0.372135	0.9316	0.724287
SpPSAEAAAPPPGPR	1	S691	Q3UNH4	G protein-regulated inducer of neurite outgrowth 1 (GRIN1)	Gprin1	0.0989931	-0.645468	1.43529	0.690825	0.374328	0.403	1	0.639288
LTPSPDIIVLSDNEASSpPR	1	S136	Q8VHR5	Transcriptional repressor p66-beta (GATA zinc finger domain-containing protein 2B) (p66/p68)	Gatad2b	-0.494232	-1.27127	1.43118	0.654136	0.535529	0.263588	1	0.429786
LTPSPDIIVLSDNEASpSPR	1	S135	Q8VHR5	Transcriptional repressor p66-beta (GATA zinc finger domain-containing protein 2B) (p66/p68)	Gatad2b	-0.494232	-1.27127	1.43118	0.654136	0.535529	0.263588	1	0.429786
EQGVESPGAQPASSpPR	1	S523	Q6PAM1	Alpha-taxilin	Txlna Txln	-0.641201	-1.2519	1.43092	0.820214	0.373515	0.237858	1	0.420533
QTGMKYpR	1	Y73	P63143	Voltage-gated potassium channel subunit beta-1 (EC 1.1.1.-) (K(+) channel subunit beta-1) (Kv-beta-1)	Kcnab1 Kvb1	0.21623	-0.525578	1.43033	0.688519	0.382686	0.437596	1	0.726407
LEEALSpTEGAEDTGNSDK	1	S524	Q61074	Protein phosphatase 1G (EC 3.1.3.16) (Fibroblast growth factor-inducible protein 13) (FIN13) (Protein phosphatase 1C) (Protein phosphatase 2C isoform gamma) (PP2C-gamma) (Protein phosphatase magnesium-dependent 1 gamma)	Ppm1g Fin13 Ppm1c	-0.751523	-0.987207	1.43017	1.19449	0.371619	0.221347	1	0.50465
HHTGEKPYpK	1	Y246	G3X9T2	RIKEN cDNA 3000002G13 (Zinc finger protein 619)	Zfp619 3000002G13Rik mCG_1050933	0.640771	-0.824157	1.42997	-0.0349557	0.372514	0.584068	1	0.56967
SPLLSASHSpGNVTpPTAPPYLQESSPR	2	S18,T22	Q9CZX7	Type 2 phosphatidylinositol 4,5-bisphosphate 4-phosphatase (Type 2 PtdIns-4,5-P2 4-Ptase) (EC 3.1.3.78) (PtdIns-4,5-P2 4-Ptase II) (Transmembrane protein 55A)	Tmem55a	0.0235043	-0.540769	1.42985	0.865574	0.375178	0.378088	1	0.69094
NILYSpNK	1	S123	E9PZE3	Protein Gm10530	Gm10530	0.538675	-0.610121	1.42913	0.280332	0.375027	0.539601	1	0.657628
RSpSSELSPEVVEK	1	S1338	Q8BTI8	Serine/arginine repetitive matrix protein 2	Srrm2 Kiaa0324	0.0249168	-0.634981	1.42296	0.763067	0.375354	0.381748	1	0.644941
LASpPSGSTSSGLEVVAPEVTSAPVSGPGILDDSATICR	1	S594	Q62318	Transcription intermediary factor 1-beta (TIF1-beta) (E3 SUMO-protein ligase TRIM28) (EC 6.3.2.-) (KRAB-A-interacting protein) (KRIP-1) (Tripartite motif-containing protein 28)	Trim28 Kap1 Krip1 Tif1b	0.131902	-0.519108	1.4217	0.770686	0.374597	0.409442	1	0.698288
HRSpEEENQVNLPK	1	S51	Q05915	GTP cyclohydrolase 1 (EC 3.5.4.16) (GTP cyclohydrolase I) (GTP-CH-I)	Gch1 Gch	-0.895693	-0.819085	1.41545	1.49206	0.377975	0.201952	1	0.56706
WTPTpEEEK	1	T5	F8VPQ1	Dedicator of cytokinesis protein 3	Dock3	0.349823	-0.41418	1.41513	0.651128	0.385749	0.479495	1	0.755168
LDHALSSPSpSPCEEIK	1	S14	Q8BGT8	Phytanoyl-CoA hydroxylase-interacting protein-like	Phyhipl	-0.410592	-1.0673	1.41431	0.757603	0.391799	0.285094	1	0.481398
GATVLPANPPGSAGSpGK	1	S336	Q3B7Z2	Oxysterol-binding protein 1	Osbp Kiaa4220	0.908995	-0.574449	1.4133	-0.0701406	0.37698	0.712349	1	0.673696
IIPTpLEEYQHYpK	2	T107,Y114	B2M1R6	Heterogeneous nuclear ribonucleoprotein K	Hnrnpk Hnrpk	0.574642	-1.27313	1.40682	-0.440946	0.414893	0.617872	1	0.493457
KVLDTKNYpK	1	Y96	F6TQQ9	Cysteine-rich PDZ-binding protein (Fragment)	Cript	-0.167238	-0.57621	1.40362	0.994647	0.382159	0.357724	1	0.681148
KTTpCKLK	1	T2352	A2ASS6	Titin (EC 2.7.11.1) (Connectin)	Ttn	1.18937	-0.531657	1.40298	-0.318042	0.378714	0.862409	1	0.734451
LFLYpASpDLK	2	Y520,S522	Q8BIV1	Zinc finger protein 719	Zfp719	-0.866568	-0.617686	1.40141	1.6503	0.387525	0.220127	1	0.655623
LLQTpTpNNSPMNSK	2	T576,T577	O08582	GTP-binding protein 1 (G-protein 1) (GP-1) (GP1)	Gtpbp1 Gtpbp	-0.270036	-0.449316	1.39496	1.21568	0.386403	0.316828	1	0.755533
LGYpTSALETpEKK	2	Y32,T38	Q8R263	Vomeronasal type-1 receptor	Vmn1r198 V1ri3 mCG_142323	0.383295	-0.527159	1.39423	0.483774	0.381575	0.514084	1	0.695533
NTVDLVNTHHLHSpSpSpDDEDDR	3	S529,S530,S531	Q7TSI3	Serine/threonine-protein phosphatase 6 regulatory subunit 1 (SAPS domain family member 1)	Ppp6r1 Kiaa1115 Pp6r1 Saps1	-0.141524	-0.637504	1.39243	0.896449	0.396342	0.372864	1	0.644094
QFKSFLGDLSSASpDK	1	S998	A2AW15	Tau-tubulin kinase 2	Ttbk2	0.153573	-0.698073	1.3888	0.537151	0.381996	0.427288	1	0.617979
NTSGTPSIAVSGTpSLSSER	1	T316	Q80T23	Synaptotagmin-like protein 5	Sytl5 Slp5	-0.415531	-0.41283	1.38105	1.38375	0.392408	0.293875	1	0.751661
EMEHNVEETYpGEHPDDK	1	Y632	D3YVW2	Golgi integral membrane protein 4	Golim4	0.561916	-0.412328	1.37919	0.404944	0.384959	0.567552	1	0.752676
DATIPVESpDTDDEGAPR	1	S468	Q99L48	60S ribosomal export protein NMD3	Nmd3	0.37866	-0.675934	1.37728	0.322688	0.387667	0.515932	1	0.627016
KPDTFLDFVYpK	1	Y1366	P0DM40	Fer-1-like protein 5	Fer1l5	0.624907	-0.593205	1.37585	0.157736	0.38541	0.605238	1	0.662886
DVGSTETSpQDGDASpSpSEGEMR	3	S307,S313,S314	Q8BSN5	PHD finger protein 23 (PDH-containing protein JUNE-1)	Phf23	0.111405	-1.43998	1.3726	-0.178786	0.554814	0.57177	1	0.477873
DQPDGTSLSPAQSpPSQSQPPAACTPR	1	S225	F6RND9	Myosin phosphatase Rho-interacting protein (Fragment)	Mprip	-0.0986048	-0.835951	1.36788	0.630531	0.387645	0.362722	1	0.560216
RKYpDTPK	1	Y175	Q9CPW5	Translocon-associated protein subunit beta (TRAP-beta) (Signal sequence receptor subunit beta) (SSR-beta)	Ssr2	1.19739	-0.4283	1.36719	-0.258497	0.388078	0.89285	1	0.743597
EATLPPVSpPPK	1	S1231	E9PVC5	Eukaryotic translation initiation factor 4 gamma 1	Eif4g1	0.387574	-0.9432	1.35948	0.0287103	0.390526	0.54341	1	0.520379
FVPIVSKTpKEGK	1	T313	G3UWE7	ATP-sensitive inward rectifier potassium channel 1 (Potassium inwardly-rectifying channel, subfamily J, member 1, isoform CRA_a)	Kcnj1 mCG_14022	0.0851752	-0.450823	1.35946	0.82346	0.394022	0.415573	1	0.731651
HIYLSpGINSpWK	2	S34,S38	E9Q393	Carnitine O-palmitoyltransferase 1, muscle isoform (Fragment)	Cpt1b	-0.550274	-0.492149	1.35145	1.40958	0.399579	0.288318	1	0.71568
GSLPPAALESSDSpTpNTpTIEDEDAKAR	3	S358,T359,T361	Q5SVJ1	Calcium/calmodulin-dependent protein kinase type II subunit beta	Camk2b	0.566756	-0.428662	1.34508	0.349664	0.393672	0.5925	1	0.75017
IDLVKYpYISpK	2	Y108,S111	Q3TRB3	Palmitoyltransferase ZDHHC17	Zdhhc17	-0.185384	-0.416005	1.34454	1.11392	0.393793	0.349945	1	0.757896
DLVPDSTpK	1	T460	Q9CPY3	Sororin (Cell division cycle-associated protein 5)	Cdca5	1.03493	-0.638543	1.34212	-0.331352	0.36817	0.779125	0.927313	0.599434
FVELFNLTpMK	1	T40	Q810N5	Uncharacterized protein C12orf60 homolog	C12orf60	1.38108	-1.22443	1.34129	-1.26422	0.288843	0.770282	0.755777	0.306096
IRAEEEDLAAVPFLASpDNEEEEDDK	1	S2929	Q4U2R1	E3 ubiquitin-protein ligase HERC2 (EC 6.3.2.-) (HECT domain and RCC1-like domain-containing protein 2)	Herc2 Jdf2 Kiaa0393 Rjs	-0.325355	-0.417189	1.33939	1.24756	0.397497	0.318136	1	0.74973
EAQAASpKYpFHMQKVTR	2	S117,Y119	E9PW42	AT-rich interactive domain-containing protein 3B	Arid3b	-0.191241	-0.614654	1.33836	0.91495	0.401369	0.346454	1	0.653555
RPPSPDVIVLSpDSEQPSpSpPR	3	S103,S109,S110	E9QMN5	Transcriptional repressor p66 alpha	Gatad2a	-0.0197739	-0.771852	1.33456	0.582485	0.396894	0.41377	1	0.585665
LNVKWSLLELSpK	1	S883	D3Z667	Dynein heavy chain 2, axonemal	Dnah2 Dnahc2	0.47257	-0.41163	1.33155	0.447348	0.408781	0.551383	1	0.753177
THSpREQSSQESGEETR	1	S229	P16014	Secretogranin-1 (Chromogranin-B) (CgB) (Secretogranin I) (SgI) [Cleaved into: CCB peptide; PE-11]	Chgb Scg-1 Scg1	0.74814	-1.3311	1.33086	-0.748375	0.466036	0.696664	1	0.416652
AEEEECENDGVGGSLLCSpYGTPPDSPGNLLSFPR	1	S319	Q80XI4	Phosphatidylinositol 5-phosphate 4-kinase type-2 beta (EC 2.7.1.149) (1-phosphatidylinositol 5-phosphate 4-kinase 2-beta) (Diphosphoinositide kinase 2-beta) (Phosphatidylinositol 5-phosphate 4-kinase type II beta) (PI(5)P 4-kinase type II beta) (PIP4KII-beta) (PtdIns(5)P-4-kinase isoform 2-beta)	Pip4k2b Pip5k2b	-1.16044	-0.56071	1.33084	1.93058	0.411141	0.177987	1	0.678001
AEEEECENDGVGGSLLCSYpGTPPDSPGNLLSFPR	1	Y320	Q80XI4	Phosphatidylinositol 5-phosphate 4-kinase type-2 beta (EC 2.7.1.149) (1-phosphatidylinositol 5-phosphate 4-kinase 2-beta) (Diphosphoinositide kinase 2-beta) (Phosphatidylinositol 5-phosphate 4-kinase type II beta) (PI(5)P 4-kinase type II beta) (PIP4KII-beta) (PtdIns(5)P-4-kinase isoform 2-beta)	Pip4k2b Pip5k2b	-1.16044	-0.56071	1.33084	1.93058	0.411141	0.177987	1	0.678001
ALEEEEMEQVGQAEHLEEEHDPSpPEEQDR	1	S356	D3YVW2	Golgi integral membrane protein 4	Golim4	0.143841	-0.493373	1.33079	0.693572	0.403391	0.440939	1	0.711016
DAFYpEVLKR	1	Y47	Q5SWY7	Protein FAM83G	Fam83g	0.188525	-0.692338	1.33015	0.449282	0.408653	0.471852	1	0.630133
GSLPPAALESpSDSpTNTpTIEDEDAKAR	3	S355,S358,T361	Q5SVJ1	Calcium/calmodulin-dependent protein kinase type II subunit beta	Camk2b	0.245778	-0.411121	1.32966	0.67276	0.401783	0.472745	1	0.753198
KGSTSLIPLYpWQWLQKTR	1	Y88	P0DJF3	Transmembrane protein 95	Tmem95	0.848058	-0.97967	1.32387	-0.50386	0.332968	0.678734	0.845679	0.422354
FQQMDDDLPESpAPESEGESEEEDDS	1	S225	A2AMV1	Ribosome assembly factor mrt4	Mrto4 2610012O22Rik mCG_122343	0.702704	-0.684148	1.32377	-0.063085	0.39119	0.698013	0.968394	0.606548
LDDAHSLGSpGAGEGYEPISpDDELDEILAGDAEK	2	S1516,S1526	E9Q784	Protein Zc3h13	Zc3h13	-0.157026	-0.405674	1.32224	1.07359	0.400074	0.359411	1	0.754919
LAAQESSpEAEDVTpVDR	2	S1049,T1055	Q6PGL7	WASH complex subunit FAM21	Fam21 D6Wsu116e Kiaa0592	-0.309083	-0.634529	1.32115	0.995702	0.403054	0.330986	1	0.648986
AQSASVESpIPEVLEECTpSPADHSDSASVHDMDYVNPR	2	S298,T307	Q6A099	MKIAA0248 protein (Prostaglandin E synthase 2) (Fragment)	Gbf1 mKIAA0248	-0.192141	-0.405741	1.31698	1.10338	0.413782	0.355386	1	0.754855
KGTENGVNGTVTpSNGADSPR	1	T359	Q91V04	Translocating chain-associated membrane protein 1	Tram1	1.7434	-1.0137	1.31246	-1.44463	0.349538	0.922227	0.732325	0.419398
VALDMTTLTpIMRYpLPR	2	T106,Y110	P62334	26S protease regulatory subunit 10B (26S proteasome AAA-ATPase subunit RPT4) (Proteasome 26S subunit ATPase 6) (Proteasome subunit p42)	Psmc6 Sug2	0.553516	-0.447519	1.31142	0.310388	0.417639	0.592052	1	0.733927
HSNLSpVEEKPSpKYK	2	S393,S399	J3QN14	Protein Zfp616	Zfp616	0.455129	-0.443773	1.31035	0.411449	0.40928	0.556849	1	0.752455
ADGDNAGTAGTpPGGTPAADK	1	T217	Q99JR8	SWI/SNF-related matrix-associated actin-dependent regulator of chromatin subfamily D member 2 (60 kDa BRG-1/Brm-associated factor subunit B) (BRG1-associated factor 60B) (BAF60B)	Smarcd2 Baf60b	0.627938	-0.462296	1.30935	0.219111	0.404205	0.641712	1	0.726557
LDYLMSpKEDNYK	1	S179	A2AR50	Ras-specific guanine nucleotide-releasing factor RalGPS1 (Ral GEF with PH domain and SH3-binding motif 1) (Ral guanine nucleotide exchange factor 2) (RalGEF 2) (RalA exchange factor RalGPS1)	Ralgps1 Kiaa0351 Ralgef2 Ralgps1a	0.408257	-0.411282	1.30794	0.488402	0.408243	0.538787	1	0.752277
RQAAAAVHPGKTpVNKCKDFSpK	2	T76,S84	E9PY65	Zinc finger protein 58 (Fragment)	Zfp58	-0.511489	-0.544146	1.30223	1.26957	0.416774	0.297777	1	0.687002
THFSRCPKQYpK	1	Y73	Q05928	Probetacellulin [Cleaved into: Betacellulin (BTC)]	Btc Bcn	-0.105015	-0.565716	1.29997	0.839265	0.409963	0.380288	1	0.675632
EDNSSpEEEEEIEPFPEER	1	S296	A2CG63	AT-rich interactive domain-containing protein 4B (ARID domain-containing protein 4B) (180 kDa Sin3-associated polypeptide) (Sin3-associated polypeptide p180) (Histone deacetylase complex subunit SAP180)	Arid4b Sap180	0.47127	-0.394255	1.29868	0.433152	0.406965	0.565771	1	0.761142
IQQFDDGGSpDEEDIWEEK	1	S588	G5E8R4	SAPS domain family, member 3, isoform CRA_c (Serine/threonine-protein phosphatase 6 regulatory subunit 3)	Ppp6r3 Saps3 mCG_3896	0.319269	-0.454322	1.29598	0.522389	0.411066	0.508156	1	0.729853
YKALAQKLYpEHEVSpLFK	2	Y213,S218	P53569	CCAAT/enhancer-binding protein zeta (CCAAT-box-binding transcription factor) (CBF) (CCAAT-binding factor)	Cebpz Cbf2 Cebpa-rs1	-0.285933	-0.442516	1.29505	1.13846	0.40801	0.336684	1	0.740056
ETpSpKDPELRSpKLQK	3	T213,S214,S221	G3UXX3	Sepiapterin reductase	Spr	-0.785696	-0.551218	1.29252	1.527	0.408822	0.237376	1	0.684909
LAEQFAAGEVLTpDMSpRKEWK	2	T30,S33	Q80X41	Serine/threonine-protein kinase VRK1 (EC 2.7.11.1) (Serine/threonine-protein kinase 51PK) (Vaccinia-related kinase 1)	Vrk1	0.119159	-0.429291	1.28287	0.734421	0.411782	0.446635	1	0.743496
FEGYpCLDLLK	1	Y463	E9Q2Y1	Glutamate receptor ionotropic, kainate 1	Grik1	1.68625	-0.857283	1.28279	-1.26074	0.312939	1	0.778201	0.426958
FEGYpCIDLLK	1	Y465	B1AS29	Glutamate receptor ionotropic, kainate 3 (GluK3) (Glutamate receptor 7) (GluR-7) (GluR7)	Grik3 Glur7	1.68625	-0.857283	1.28279	-1.26074	0.312939	1	0.778201	0.426958
AAVGVTGNDITpTPPNK	1	T657	E9PWC0	Microtubule-associated protein	Map4	1.83205	-0.577903	1.28102	-1.12893	0.281554	1	0.683718	0.457572
DDKAFTpK	1	T7	P62715	Serine/threonine-protein phosphatase 2A catalytic subunit beta isoform (PP2A-beta) (EC 3.1.3.16)	Ppp2cb	-0.128345	-0.387187	1.27934	1.0205	0.412938	0.394434	0.990494	0.786764
HGIGLESpKGKWVYpK	2	S77,Y83	Q9ET77	Junctophilin-3 (JP-3) (Junctophilin type 3)	Jph3 Jp3	-0.697519	-0.50714	1.2761	1.46648	0.413826	0.268385	1	0.712152
GSDDVLVSGEVPECEVGHMSpPR	1	S2001	E9Q6J5	Protein Bod1l	Bod1l	0.157897	-0.394902	1.27518	0.722383	0.413491	0.462546	1	0.761503
KTEKPLILQPLGSpRTpQNVEVTK	2	S252,T254	Q9JLQ0	CD2-associated protein (Mesenchyme-to-epithelium transition protein with SH3 domains 1) (METS-1)	Cd2ap Mets1	1.29397	-0.56675	1.27393	-0.586792	0.392426	0.951015	0.938656	0.638182
GSISSVDGESpCNGSNDR	1	S474	Q8K0F1	TBC1 domain family member 23	Tbc1d23	0.248009	-0.598493	1.27026	0.423753	0.423943	0.507783	1	0.664402
KGDVEGSQSpQDEGEGSGESER	1	S1067	Q9CW03	Structural maintenance of chromosomes protein 3 (SMC protein 3) (SMC-3) (Basement membrane-associated chondroitin proteoglycan) (Bamacan) (Chondroitin sulfate proteoglycan 6) (Chromosome segregation protein SmcD) (Mad member-interacting protein 1)	Smc3 Bam Bmh Cspg6 Mmip1 Smc3l1 Smcd	0.268697	-0.715766	1.27014	0.285675	0.419157	0.500709	1	0.609331
FQEQECPPSpPEPTR	1	S186	P62071	Ras-related protein R-Ras2	Rras2	0.410478	-0.423441	1.27005	0.436129	0.424459	0.552481	1	0.750518
YVYHSpSK	1	S179	G3X919	T-box transcription factor TBX18 (T-box18)	Tbx18 mCG_11893	-0.279378	-0.866367	1.26745	0.680457	0.428104	0.35037	1	0.571493
DVAEGNVSpDLEAEEEVQSAPPK	1	S823	Q91V83	TELO2-interacting protein 1 homolog	Tti1	-0.197004	-0.691325	1.26162	0.767299	0.428149	0.372671	1	0.630314
QMKNLLTpLK	1	T251	Q3UX49	Expressed sequence C87499	C87499 mCG_146280	-0.15004	-0.579629	1.25585	0.826259	0.428899	0.421916	1	0.716571
KCCLKTpTAK	1	T2046	D3Z3A8	Unconventional myosin-IXa	Myo9a	-0.492227	-1.10895	1.25519	0.638463	0.429468	0.319253	1	0.477122
LNEVIVNKSpR	1	S1086	Q91V14	Solute carrier family 12 member 5 (Electroneutral potassium-chloride cotransporter 2) (K-Cl cotransporter 2) (mKCC2) (Neuronal K-Cl cotransporter)	Slc12a5 Kcc2 Kiaa1176	0.10778	-0.649493	1.25009	0.492813	0.422785	0.455164	1	0.637934
LVELPVSSQPSpAEDSpDTEDDSpEAEQGER	3	S1939 (0.27)	Q4U2R1	E3 ubiquitin-protein ligase HERC2 (EC 6.3.2.-) (HECT domain and RCC1-like domain-containing protein 2)	Herc2 Jdf2 Kiaa0393 Rjs	-0.208877	-0.54872	1.24954	0.909697	0.422691	0.371274	1	0.694335
SRQPSGAGLCDITpEGTVVPEDR	1	T701	D3Z079	Syntaxin-binding protein 5	Stxbp5	0.417198	-0.572089	1.24928	0.259996	0.423807	0.566011	1	0.674811
RAFINTpVHRIVSFSpKK	2	T302,S310	Q8VFU1	Olfactory receptor	Olfr822 mCG_57667	-0.39106	-0.417539	1.24816	1.22168	0.421662	0.321576	1	0.749691
YpTQAGNK	1	Y1213	E9PY46	Protein Ift140	Ift140	1.12185	-1.04369	1.2478	-0.917741	0.412283	0.896994	0.972733	0.479215
KDIDDLELTpLAKAEK	1	T967	A2AQP0	Myosin-7B (Myosin cardiac muscle beta chain) (Myosin heavy chain 7B, cardiac muscle beta isoform)	Myh7b	-0.818632	-0.488164	1.24761	1.57807	0.421901	0.244492	1	0.714402
ELEASFGRPVVDGADGEPHSpVSPR	1	S293	Q63932	Dual specificity mitogen-activated protein kinase kinase 2 (MAP kinase kinase 2) (MAPKK 2) (EC 2.7.12.2) (ERK activator kinase 2) (MAPK/ERK kinase 2) (MEK 2)	Map2k2 Mek2 Mkk2 Prkmk2	0.713055	-0.588154	1.24596	-0.0552452	0.427408	0.698759	1	0.666282
LQCPVTEPGQGILENTGTEPGETSpDK	1	S308	Q8K1J5	Protein SDE2 homolog	Sde2	-0.209742	-0.430965	1.24241	1.02118	0.408612	0.353791	0.964828	0.755756
RVESSpYpSPSPKEAERK	2	S315,Y316	D3Z2N8	Deuterosome protein 1 (Fragment)	Ccdc67	0.525838	-0.39182	1.24211	0.324448	0.424014	0.608973	1	0.76683
EPEILWYpK	1	Y182	B1ASU0	Interleukin-1 receptor accessory protein-like 1	Il1rapl1	0.465953	-0.577354	1.236	0.192694	0.424573	0.586473	1	0.676278
MQAESQSPTpNVDLEDK	1	T1065	P58871	182 kDa tankyrase-1-binding protein	Tnks1bp1 Kiaa1741 Tab182	0.210811	-0.391204	1.23401	0.631999	0.435111	0.509841	1	0.767498
SPSESAEETHTpLEEK	1	T156	Q9CT10	Ran-binding protein 3 (RanBP3)	Ranbp3	-0.450641	-0.389616	1.23393	1.29496	0.433198	0.311474	1	0.77437
EWSLESSPAQNWTpPPQPK	1	T135	Q3TGS9	ADP-ribosylation factor GTPase-activating protein 1	Arfgap1	-0.133616	-0.755856	1.23331	0.61107	0.425393	0.391086	1	0.597957
PQSpSGTKK	1	S27	E9PY86	Lysyl oxidase homolog 4 (Fragment)	Loxl4	-0.000656865	-0.440272	1.23229	0.792676	0.426814	0.427243	1	0.737184
RELDKAESpEIK	1	S920	A2AWA9	Rab GTPase-activating protein 1 (GAP and centrosome-associated protein) (Rab6 GTPase-activating protein GAPCenA)	Rabgap1 Kiaa4104	0.0819077	-0.521949	1.22409	0.620238	0.428397	0.456312	1	0.697076
EEASDYLELDTpIKNLVRK	1	T263	P08113	Endoplasmin (94 kDa glucose-regulated protein) (GRP-94) (Endoplasmic reticulum resident protein 99) (ERp99) (Heat shock protein 90 kDa beta member 1) (Polymorphic tumor rejection antigen 1) (Tumor rejection antigen gp96)	Hsp90b1 Grp94 Tra-1 Tra1	-0.404425	-0.47	1.22079	1.15521	0.439	0.333045	1	0.731824
SGAHGGRPGSAHSpPPDKPSpSPR	2	S333,S339	Q80WV7	Serine/arginine repetitive matrix protein 3	Srrm3 MNCb-4760	0.41138	-0.41083	1.21966	0.397446	0.436068	0.604579	1	0.76401
GSLPPAALESSpDSpTNTpTIEDEDAKAR	3	S356,S358,T361	Q5SVJ1	Calcium/calmodulin-dependent protein kinase type II subunit beta	Camk2b	0.349228	-0.434587	1.21962	0.435808	0.429824	0.556434	1	0.742068
SPLLSASHSGNVTpPTAPPYLQESSPR	1	T22	Q9CZX7	Type 2 phosphatidylinositol 4,5-bisphosphate 4-phosphatase (Type 2 PtdIns-4,5-P2 4-Ptase) (EC 3.1.3.78) (PtdIns-4,5-P2 4-Ptase II) (Transmembrane protein 55A)	Tmem55a	-0.0986458	-0.465259	1.21852	0.851911	0.437807	0.410797	1	0.728106
RKLVCTpR	1	T905	E9PUN6	A disintegrin-like and metallopeptidase (reprolysin type) with thrombospondin type 1 motif, 9	Adamts9	-0.186165	-0.464168	1.21463	0.936629	0.437611	0.392863	1	0.735555
DVLIEFYpAPWCGHCKNLEPK	1	Y402	P27773	Protein disulfide-isomerase A3 (EC 5.3.4.1) (58 kDa glucose-regulated protein) (58 kDa microsomal protein) (p58) (Disulfide isomerase ER-60) (Endoplasmic reticulum resident protein 57) (ER protein 57) (ERp57) (Endoplasmic reticulum resident protein 60) (ER protein 60) (ERp60)	Pdia3 Erp Erp60 Grp58	-0.44757	-0.44137	1.21304	1.21924	0.436835	0.328823	1	0.748914
IPQVFLKQIEKTpMRRAYEK	1	T425	Q810K9	Glucoside xylosyltransferase 2 (EC 2.4.2.n2) (Glycosyltransferase 8 domain-containing protein 4)	Gxylt2 Glt8d4	-0.794587	-0.560641	1.21268	1.44663	0.438968	0.248827	1	0.679308
DSpFLYSLPHR	1	S280	A2AGR6	DNA damage-binding protein 2	Ddb2	0.0220937	-0.459983	1.21218	0.730107	0.431615	0.438973	1	0.728961
RPPSPDVIVLSpDSpEQPSpSPR	3	S103,S105,S109	E9QMN5	Transcriptional repressor p66 alpha	Gatad2a	-0.171045	-0.780891	1.2035	0.593652	0.435972	0.401919	1	0.582409
KPNQPYpKWISpYpK	3	Y103,S107,Y108	Q8JZR0	Long-chain-fatty-acid--CoA ligase 5 (EC 6.2.1.3) (Long-chain acyl-CoA synthetase 5) (LACS 5)	Acsl5 Facl5	-0.278731	-0.398027	1.20034	1.08105	0.435322	0.367621	1	0.763172
EVVDTLSpNGSpETDGDDTPR	2	S125,S128	Q8C0C3	Trafficking protein particle complex subunit 12	Trappc12 Ttc15	0.00847366	-0.545711	1.19768	0.6435	0.445753	0.45179	1	0.685122
EQGVESpPGAQPASSPR	1	S515	Q6PAM1	Alpha-taxilin	Txlna Txln	0.00821044	-0.484915	1.19644	0.703316	0.436429	0.440521	1	0.716092
QVSpASELCTSGILDR	1	S2705(;3220,3735,4250,4765,5280,5795,6310)	Q8R0W0	Epiplakin	Eppk1	0.215113	-0.671682	1.19134	0.304545	0.444191	0.520727	1	0.640464
QGHSIVVSSpLKVFYpK	2	S235,Y240	Q91V83	TELO2-interacting protein 1 homolog	Tti1	-0.290212	-0.397891	1.18955	1.08187	0.438472	0.359547	1	0.758995
EGSIETLSNSpSpGSTSGSIPR	2	S893,S894	B1AR76	Breast carcinoma-amplified sequence 3 homolog (Fragment)	Bcas3	0.202062	-0.42185	1.18861	0.564703	0.438969	0.504689	1	0.746783
GSLPPAALESSpDSpTpNTTIEDEDAKAR	3	S356,S358,T359	Q5SVJ1	Calcium/calmodulin-dependent protein kinase type II subunit beta	Camk2b	0.364184	-0.40286	1.18813	0.421084	0.438897	0.57489	1	0.758377
YDLDSpPLQK	1	S756	Q8CDN1	Uncharacterized protein C3orf20 homolog	C3orf20	0.661097	-0.766093	1.18539	-0.241799	0.447478	0.695329	1	0.589868
RLYpCTpPSK	2	Y165,T167	Q62082-2	Myosin regulatory light chain 10	Myl10	0.559083	-0.49562	1.18539	0.130682	0.44188	0.64822	1	0.72206
AEEGGESpEGDASEK	1	S441	Q8BGC0	HIV Tat-specific factor 1 homolog	Htatsf1	0.383275	-0.467076	1.18527	0.33492	0.449614	0.588735	1	0.723465
DQLGGLKGSpKIK	1	S2979	Q4U2R1	E3 ubiquitin-protein ligase HERC2 (EC 6.3.2.-) (HECT domain and RCC1-like domain-containing protein 2)	Herc2 Jdf2 Kiaa0393 Rjs	0.0962826	-0.594079	1.18329	0.492931	0.440358	0.471479	1	0.67538
NNFEYpTKRKTFLR	1	Y1515	A2AF47	Dedicator of cytokinesis protein 11 (Activated Cdc42-associated guanine nucleotide exchange factor) (ACG) (Zizimin-2)	Dock11 Ziz2	-0.559886	-0.412226	1.18223	1.32989	0.441639	0.302049	1	0.755562
NNFEDLHCKFYpQLEK	1	Y668	A6H6A9	Rab GTPase-activating protein 1-like	Rabgap1l Hhl Kiaa0471	0.0704619	-0.509367	1.17967	0.599844	0.441896	0.472762	1	0.7053
KTpSpGLVSLHSpRR	3	T109,S110,S117	E9QPH0	cGMP-dependent protein kinase (EC 2.7.11.12)	Prkg2	-0.242769	-0.483848	1.17924	0.938161	0.454906	0.374054	1	0.71533
TDWSSGDASRPSSDSpADSPK	1	S306	F8VQN6	Rho guanine nucleotide exchange factor 12	Arhgef12	-0.0646418	-0.450066	1.17793	0.792507	0.442571	0.428945	1	0.732588
PVVSDDDSEEEQEEDRSGSGSpEED	1	S1610	Q3TKT4	Transcription activator BRG1 (EC 3.6.4.-) (ATP-dependent helicase SMARCA4) (BRG1-associated factor 190A) (BAF190A) (Protein brahma homolog 1) (SNF2-beta) (SWI/SNF-related matrix-associated actin-dependent regulator of chromatin subfamily A member 4)	Smarca4 Baf190a Brg1 Snf2b Snf2l4	-0.49738	-0.442491	1.17499	1.22988	0.442989	0.317857	1	0.735891
PVVSDDDSEEEQEEDRSpGSGSEED	1	S1606	Q3TKT4	Transcription activator BRG1 (EC 3.6.4.-) (ATP-dependent helicase SMARCA4) (BRG1-associated factor 190A) (BAF190A) (Protein brahma homolog 1) (SNF2-beta) (SWI/SNF-related matrix-associated actin-dependent regulator of chromatin subfamily A member 4)	Smarca4 Baf190a Brg1 Snf2b Snf2l4	-0.49738	-0.442491	1.17499	1.22988	0.442989	0.317857	1	0.735891
YQDEVFGGFVTEPQEESpEEEVEEPEER	1	S149	P97855	Ras GTPase-activating protein-binding protein 1 (G3BP-1) (EC 3.6.4.12) (EC 3.6.4.13) (ATP-dependent DNA helicase VIII) (GAP SH3 domain-binding protein 1) (HDH-VIII)	G3bp1 G3bp	-0.611732	-0.527747	1.17264	1.25662	0.445146	0.291851	1	0.71089
LPSYGLCESGNTSSSpPPGPR	1	S80	E9Q7U2	Calcium-binding and coiled-coil domain-containing protein 1	Calcoco1	-0.0172262	-0.507874	1.17182	0.681172	0.44439	0.444712	1	0.712729
LASPSpGSTSpSGLEVVAPEVTSAPVSGPGILDDSATICR	2	S596,,S610	Q62318	Transcription intermediary factor 1-beta (TIF1-beta) (E3 SUMO-protein ligase TRIM28) (EC 6.3.2.-) (KRAB-A-interacting protein) (KRIP-1) (Tripartite motif-containing protein 28)	Trim28 Kap1 Krip1 Tif1b	0.196118	-0.401879	1.17137	0.573372	0.445535	0.509203	1	0.757679
LASPSpGSTSSGLEVVAPEVTpSAPVSGPGILDDSATICR	2	S596,T621	Q62318	Transcription intermediary factor 1-beta (TIF1-beta) (E3 SUMO-protein ligase TRIM28) (EC 6.3.2.-) (KRAB-A-interacting protein) (KRIP-1) (Tripartite motif-containing protein 28)	Trim28 Kap1 Krip1 Tif1b	0.196118	-0.401879	1.17137	0.573372	0.445535	0.509203	1	0.757679
EDLTDLEQAGSpPR	1	S260	H3BLM8	Prostaglandin E synthase 2 (Fragment)	Gbf1	-0.213066	-0.719181	1.17098	0.664863	0.457077	0.393724	1	0.608578
HREKLLSpGNESSSKK	1	T1471	Q9CVI2	Protein FAM133B	Fam133b	1.59226	-0.871732	1.17068	-1.29331	0.332279	1	0.752228	0.408501
EVLMLKDKLEKSpK	1	S743	Q7TT50	Serine/threonine-protein kinase MRCK beta (EC 2.7.11.1) (CDC42-binding protein kinase beta) (DMPK-like beta) (Myotonic dystrophy kinase-related CDC42-binding kinase beta) (MRCK beta) (Myotonic dystrophy protein kinase-like beta)	Cdc42bpb Kiaa1124	-0.288521	-0.698107	1.1694	0.759817	0.451007	0.391639	1	0.637823
DRGTPATAGSSpGETK	1	S29	D3Z7I8	Replication factor C subunit 4	Rfc4	0.235607	-0.582011	1.16821	0.350587	0.45075	0.559289	1	0.669087
DRGTPATAGSSGETpK	1	T32	D3Z7I8	Replication factor C subunit 4	Rfc4	0.235607	-0.582011	1.16821	0.350587	0.45075	0.559289	1	0.669087
KFETpEEEK	1	T361	Q8VHI7	Coiled-coil domain-containing protein 65 (Testis development protein NYD-SP28)	Ccdc65	0.471081	-0.472031	1.16763	0.224518	0.445935	0.629588	1	0.721465
INVTpEVYpDK	2	T281,Y284	Q8BTJ4	Bis(5'-adenosyl)-triphosphatase enpp4 (EC 3.6.1.29) (AP3A hydrolase) (AP3Aase) (Ectonucleotide pyrophosphatase/phosphodiesterase family member 4) (E-NPP 4) (NPP-4)	Enpp4 Kiaa0879	-0.888178	-0.710124	1.16256	1.34061	0.45013	0.248389	1	0.616376
LAIQGPEDSPSpR	1	S239	Q99KX1	Myeloid leukemia factor 2 (Myelodysplasia-myeloid leukemia factor 2)	Mlf2	0.664546	-0.916174	1.16069	-0.420031	0.459487	0.70992	1	0.530671
LGGLLESKEDHYpSpR	2	Y755,S756	Q5IR70	Cancer-associated gene 1 protein homolog (CAGE-1) (Cancer/testis antigen 3 homolog) (CT3 homolog)	Cage1 Ctag3	0.105728	-0.53903	1.15952	0.51476	0.447669	0.484284	1	0.690708
QQNLDMFKSpFKATDPGIK	1	S88	Q8BG92	Clavesin-2 (Retinaldehyde-binding protein 1-like 2)	Clvs2 Rlbp1l2	-0.549878	-0.510227	1.15928	1.19893	0.44128	0.321176	0.973949	0.733639
GFGFGQGAGALVHSpE	1	S192	P97315	Cysteine and glycine-rich protein 1 (Cysteine-rich protein 1) (CRP) (CRP1)	Csrp1 Crp1 Csrp	-0.495227	-0.577645	1.15413	1.07171	0.449957	0.319706	1	0.670425
GGEATWSGSEFEISpFPDSpPGAQAQADHLPR	2	S372,S376	Q91X51	Golgi reassembly-stacking protein 1 (Golgi peripheral membrane protein p65) (Golgi reassembly-stacking protein of 65 kDa) (GRASP65)	Gorasp1	-0.980223	-0.721373	1.14913	1.40798	0.451252	0.22871	1	0.606574
NPEQVDLYpQFMAK	1	Y551	E9QB02	Methionine--tRNA ligase, cytoplasmic	Mars	0.0404704	-0.600072	1.13901	0.498468	0.457653	0.467541	1	0.666224
PVPGFEECEDEVTSpDPATD	1	S432	D3YWJ4	Protein farnesyltransferase subunit beta	Fntb	-0.581477	-0.476586	1.13812	1.24301	0.456281	0.305446	1	0.718891
EYpTEYLASLVTQK	1	Y32	Q8BRM6	Meiosis-specific protein MEI4	Mei4	0.443624	-0.720717	1.13488	-0.02946	0.462568	0.621746	1	0.608445
LLVSMCQGNRDERQSpVNHQMAQEDAQR	1	S311	Q07076	Annexin A7 (Annexin VII) (Annexin-7) (Synexin)	Anxa7 Anx7	-0.0219224	-0.439991	1.13424	0.716175	0.460169	0.448703	1	0.73849
VEQLSSGLEHDNLEAHSpPEQPPR	1	S748	Q99K01	Pyridoxal-dependent decarboxylase domain-containing protein 1 (EC 4.1.1.-)	Pdxdc1	-0.0815283	-0.452855	1.13357	0.762248	0.457059	0.436848	1	0.732309
LFPDKSpKVNSpCNK	2	S118,S122	Q8BU04	Putative E3 ubiquitin-protein ligase UBR7 (EC 2.3.2.27) (N-recognin-7) (RING-type E3 ubiquitin transferase UBR7)	Ubr7	-0.54893	-0.731464	1.13289	0.950356	0.456451	0.335452	1	0.626614
KTpDDAEISpIK	2	T295,S301	Q8CDG1	Piwi-like protein 2 (EC 3.1.26.-)	Piwil2 Mili	-0.251552	-0.736662	1.13231	0.647201	0.464106	0.384647	1	0.600893
SQSSHSpYDDSTLPLIDR	1	S864	D3Z2H2	Catenin delta-1	Ctnnd1	0.542854	-0.69787	1.13139	-0.109337	0.468209	0.669339	1	0.623557
LQPLDTMESpDSpEVEAI	2	S631,S633	Q9WU38	Amiloride-sensitive sodium channel subunit beta (Beta-NaCH) (Epithelial Na(+) channel subunit beta) (Beta-ENaC) (Nonvoltage-gated sodium channel 1 subunit beta) (SCNEB)	Scnn1b	-0.592296	-1.02873	1.13033	0.693899	0.570463	0.378798	1	0.571719
KTLNRIYpHQNRK	1	Y528	O08601	Microsomal triglyceride transfer protein large subunit	Mttp Mtp	0.421136	-0.411442	1.12525	0.292672	0.458788	0.614314	1	0.756492
SSSGSTpHSGSR	1	T319	D3Z4T9	Zinc finger Ran-binding domain-containing protein 2	Zranb2	0.00889432	-0.542906	1.12392	0.572117	0.469682	0.471354	1	0.687333
HSpLKSpDK	2	S326,S329	A2AHB6	Potassium channel subfamily T member 1	Kcnt1	0.0629939	-0.670908	1.12312	0.389215	0.469392	0.493765	1	0.643126
QAGLDTpHLSpGKEQLTFLAPLNSVFK	2	T402,S405	P82198	Transforming growth factor-beta-induced protein ig-h3 (Beta ig-h3)	Tgfbi	-0.493713	-0.389575	1.11613	1.22027	0.463612	0.332882	1	0.773284
RRSPSpVSSPEPTEK	1	S1685	Q8BTI8	Serine/arginine repetitive matrix protein 2	Srrm2 Kiaa0324	-0.590736	-0.744709	1.11383	0.959855	0.47288	0.311637	1	0.596789
RLAAQESpSpEAEDVTVDR	2	S1048,S1049	Q6PGL7	WASH complex subunit FAM21	Fam21 D6Wsu116e Kiaa0592	0.0889046	-0.54757	1.11286	0.476386	0.469005	0.492522	1	0.6842
VMLGETNPADSpKPGTIR	1	S99	E9PZF0	Nucleoside diphosphate kinase (EC 2.7.4.6)	Gm20390	0.549161	-0.406103	1.10784	0.152577	0.465083	0.682713	1	0.756808
ATEEEDSDEDAVLAPSGVTGAGTpGDEGDGQAPGST	1	T479	Q9CT10	Ran-binding protein 3 (RanBP3)	Ranbp3	-0.20848	-0.500913	1.10607	0.81364	0.475759	0.422677	1	0.709042
TPDLSNQNSSpDQANEEWETASESSDFNER	1	S1461	Q3TLH4	Protein PRRC2C (BAT2 domain-containing protein 1) (HLA-B-associated transcript 2-like 2) (Proline-rich and coiled-coil-containing protein 2C)	Prrc2c Bat2d Bat2d1 Bat2l2 Kiaa1096	-0.242291	-0.881498	1.10546	0.466255	0.474219	0.394839	1	0.557042
GSDIDNPTLTpVTDISPPSRSPR	1	T339	G5E8L8	Mitogen activated protein kinase kinase kinase 2 (Mitogen-activated protein kinase kinase kinase 2)	Map3k2 mCG_127139	0.359126	-0.58235	1.10499	0.163512	0.466441	0.596726	1	0.668508
AVPIAVADEGESpESpEDDDLKPR	2	S132,S134	F6QWP5	Ubiquitinyl hydrolase 1 (EC 3.4.19.12) (Fragment)	Usp20	0.520648	-0.47243	1.1039	0.110824	0.469111	0.667659	1	0.720751
LFMEQEDVGLGELSSpEEGSpVGSpDR	3	S205,S209,S212	Q6PGL7	WASH complex subunit FAM21	Fam21 D6Wsu116e Kiaa0592	-0.128355	-0.394529	1.10315	0.836973	0.469734	0.434247	1	0.763739
LFMEQEDVGLGELSpSEEGSpVGSpDR	3	S204,S209,S212	Q6PGL7	WASH complex subunit FAM21	Fam21 D6Wsu116e Kiaa0592	-0.128355	-0.394529	1.10315	0.836973	0.469734	0.434247	1	0.763739
EFSpTNNPFK	1	S206	E9QAS4	Chromodomain-helicase-DNA-binding protein 4	Chd4	-0.164901	-0.447244	1.09978	0.817434	0.473443	0.416206	1	0.733449
EITINQSLLAPLSpVDIDPTIQQVRQEER	1	S71	Q9DCV7	Keratin, type II cytoskeletal 7 (Cytokeratin-7) (CK-7) (Keratin-7) (K7) (Type-II keratin Kb7)	Krt7 Krt2-7	-0.573361	-0.647796	1.09915	1.02471	0.467419	0.339379	1	0.643923
ESTVLGDSEEPSpE	1	S664	A2AD03	Rab proteins geranylgeranyltransferase component A 1	Chm	0.711152	-0.497921	1.09865	-0.110419	0.471859	0.775635	1	0.713034
EVSpSpRVK	2	S519,S520	Q499E4	Zinc finger protein DZIP1L (DAZ-interacting protein 1-like protein) (Protein warpy)	Dzip1l wpy	-0.0315036	-0.464393	1.09236	0.659467	0.469032	0.465522	1	0.733291
SDDESPSTSpSpGSSDADQRDPAAPEPEEQEER	2	S17,S18	B2FDH0	Ubiquitin-conjugating enzyme E2 E3 (Fragment)	Ube2e3	0.0694291	-0.383629	1.08967	0.636608	0.48198	0.559476	1	0.78307
GSYRYpYpFK	2	Y823,Y824	E9QMJ8	Axin-1	Axin1	0.925411	-0.496921	1.08771	-0.334624	0.47867	0.898867	1	0.711793
VDHGAEIITQSpPSpRSpSVASPR	3	S1783,S1785,S1787	P20357	Methionine aminopeptidase 2 (MAP 2) (MetAP 2) (EC 3.4.11.18) (Initiation factor 2-associated 67 kDa glycoprotein) (p67) (p67eIF2) (Peptidase M)	Metap2 Mnpep P67eif2	0.684422	-0.465486	1.085	-0.0649057	0.474516	0.760273	1	0.724471
VEQALSEVASpSLQSpSAPK	2	S677,S681	E9Q6P5	Tetratricopeptide repeat protein 7B (TPR repeat protein 7B)	Ttc7b	0.0512203	-0.652632	1.08063	0.376781	0.472953	0.497936	1	0.637543
RSpIWDVISpK	2	S1516,S1522	E9Q876	Protein Abca12	Abca12	-0.204017	-0.517217	1.0802	0.766995	0.4734	0.410785	1	0.699131
GLAAEDSGGDSpK	1	S209	B1AUY7	N-alpha-acetyltransferase 10	Naa10	0.660818	-0.395455	1.07848	0.0222051	0.482576	0.748735	1	0.774965
CSSLGNAASSEDTGSpPPPIADR	1	S67	Q9CZ09	Histidine protein methyltransferase 1 homolog (Methyltransferase-like protein 18) (EC 2.1.1.-)	Mettl18	0.0814352	-0.465959	1.07741	0.530014	0.47696	0.517944	1	0.733342
STETSDFENIESpPLNER	1	S891	Q8BY87	Ubiquitin carboxyl-terminal hydrolase 47 (EC 3.4.19.12) (Deubiquitinating enzyme 47) (Ubiquitin thioesterase 47) (Ubiquitin-specific-processing protease 47)	Usp47	-0.1969	-0.946122	1.07619	0.326965	0.520487	0.419204	1	0.547212
QDSDSpDVVDVEDTEQDFIGEDHPVVIPR	1	S736	A2AHC3	Calmodulin-regulated spectrin-associated protein 1	Camsap1	0.0920912	-0.413581	1.07301	0.567342	0.475458	0.507321	1	0.751423
NNELEELKILYpKKK	1	Y300	A2ABQ5	Centrosomal protein of 112 kDa (Fragment)	Cep112 Ccdc46	-0.443108	-0.463982	1.07101	1.05014	0.476	0.350325	1	0.725482
APPEGCVSEDEGEGDSp	1	S922	B1AVH7	TBC1 domain family member 2A	Tbc1d2 Tbc1d2a	0.479443	-0.529807	1.06873	0.0594793	0.477712	0.667361	1	0.692778
LQHTGPADDGATRSpPSpIDSpIQK	3	S509,S511,S514	A2AS44	Plakophilin-4 (Fragment)	Pkp4	-0.00297992	-0.563583	1.06852	0.507912	0.482534	0.481263	1	0.679226
SLEETLHNVDLSpSpDDELPR	2	S203,S204	Q63918	Serum deprivation-response protein (Cavin-2) (Phosphatidylserine-binding protein)	Sdpr Sdr	-0.775969	-0.504249	1.06836	1.34008	0.476973	0.281992	1	0.713381
RYTpMRDPPK	1	T34	J3QQ61	Uncharacterized protein	Gm4845	-0.509747	-1.39617	1.06741	0.180983	0.479555	0.335196	1	0.379935
AGEQQLSpEPEDMEMEAGDTDDPPR	1	S19	E0CY04	Ubiquitin carboxyl-terminal hydrolase 7	Usp7	0.187524	-0.460015	1.06634	0.418799	0.478425	0.569762	1	0.726982
HSpPGCAFLTVK	1	S81	O70201	Baculoviral IAP repeat-containing protein 5 (Apoptosis inhibitor 4) (Apoptosis inhibitor survivin) (TIAP)	Birc5 Api4 Iap4	0.825597	-0.605259	1.0642	-0.366652	0.481835	0.847578	1	0.657421
HGTpPGK	1	T131	G3UXA9	Complement C1q tumor necrosis factor-related protein 2 (Fragment)	C1qtnf2	0.34855	-0.418729	1.06003	0.292751	0.490147	0.611294	0.998748	0.779114
LERLQVSpR	1	S715	Q60625	Intercellular adhesion molecule 5 (ICAM-5) (Telencephalin)	Icam5 Icam3 Tlcn	0.148682	-0.729571	1.05968	0.18143	0.490171	0.532001	1	0.60309
DGDALDLEESpSpSpSpEHAERPPGPR	4	S296,S297,S298,S299	Q01338	Alpha-2A adrenergic receptor (Alpha-2A adrenoreceptor) (Alpha-2A adrenoceptor) (Alpha-2AAR)	Adra2a	0.110421	-0.421715	1.05351	0.52137	0.487346	0.53085	1	0.746738
STAIGTSCQGAMLPSITpNVINLADSHDR	1	T2521	E9PWT1	Transformation/transcription domain-associated protein	Trrap	-0.792381	-1.32285	1.0534	0.522923	0.538497	0.279869	1	0.424909
STAIGTSCQGAMLPSpITNVINLADSHDR	1	S2519	E9PWT1	Transformation/transcription domain-associated protein	Trrap	-0.792381	-1.32285	1.0534	0.522923	0.538497	0.279869	1	0.424909
KMSpQPGSpPSPK	2	S1524,S1528	E9QAS4	Chromodomain-helicase-DNA-binding protein 4	Chd4	-0.0253629	-0.535501	1.05283	0.54269	0.490643	0.484766	1	0.69855
EKVPKYRTpPK	1	T519	E9QMW4	Uncharacterized protein C16orf96 homolog	C16orf96	-0.241176	-0.395332	1.05267	0.898514	0.485635	0.407862	1	0.761734
SLSNSpNPDISGTPTSPDDEVR	1	S900	A2A9M5	Dedicator of cytokinesis protein 7	Dock7	1.3504	-0.438142	1.0474	-0.741144	0.403617	1	0.813784	0.598318
QNTEEHSpLRDPK	1	S284	Q5FWH7	Zinc transporter ZIP12 (Solute carrier family 39 member 12) (Zrt- and Irt-like protein 12) (ZIP-12)	Slc39a12 Zip12	-0.527686	-0.391821	1.04072	1.17659	0.495607	0.352398	1	0.763025
HTGDKPYpECK	1	Y355	A2ARW8	Predicted gene 14399	Gm14399	0.118121	-0.452695	1.03994	0.469123	0.487058	0.527846	1	0.732122
QTHVSpGVK	1	S69	F6VNP0	S-adenosyl-L-methionine-dependent tRNA 4-demethylwyosine synthase (Fragment)	Tyw1	-0.254206	-0.407892	1.03931	0.885629	0.487465	0.412479	1	0.759314
DSGLEDGRESPSFDTPSpQR	1	S96	B1AWV9	Anion exchange protein	Slc4a10	1.40879	-1.5422	1.03695	-1.91404	0.334545	0.811393	0.685968	0.210059
SpPLNQGDSSTPNLPK	1	S120	F8VPR5	CREB-binding protein	Crebbp	0.285437	-0.562505	1.03666	0.188717	0.490454	0.5997	1	0.67776
PVFSIGDEEEYDTDEIDSSSpMSDDDR	1	S554	Q8K0F1	TBC1 domain family member 23	Tbc1d23	-0.707756	-0.544055	1.03565	1.19935	0.488641	0.303792	1	0.685856
QLQEFSSAIEEYpNSpALAEKK	2	Y122,S124	O54692	Centromere/kinetochore protein zw10 homolog	Zw10	2.23818	-0.381563	1.03565	-1.5841	0.22153	1	0.455201	0.352012
EYpTDGTFR	1	Y788	A2AI62	Hephaestin	Heph	1.14398	-0.414011	1.03485	-0.523146	0.370706	0.789719	0.749041	0.5619
YpSCESRIR	1	Y161	O54788	DNA fragmentation factor subunit beta (EC 3.-.-.-) (Caspase-activated deoxyribonuclease) (CAD) (Caspase-activated DNase) (DNA fragmentation factor 40 kDa subunit) (DFF-40)	Dffb Cad	0.863427	-0.59887	1.03473	-0.427567	0.474574	0.859835	0.956287	0.635335
VYpDKVQNEAK	1	Y359	Q8JZR0	Long-chain-fatty-acid--CoA ligase 5 (EC 6.2.1.3) (Long-chain acyl-CoA synthetase 5) (LACS 5)	Acsl5 Facl5	-0.723164	-0.419888	1.03226	1.33554	0.489819	0.297235	1	0.752922
EVTSpALK	1	S301	Q8VET2	Olfactory receptor	Olfr1394 mCG_55366	0.506544	-0.976901	1.03141	-0.452032	0.493156	0.695025	1	0.516965
AQEHTDTGDRSESpPEEPALEKPPLDK	1	S83	Q8BYU6	Torsin-1A-interacting protein 2	Tor1aip2 Ifrg15 Lull1	0.141658	-0.427565	1.02976	0.460538	0.494297	0.560338	1	0.747889
SQSSHSYDDSpTLPLIDR	1	S868	D3Z2H2	Catenin delta-1	Ctnnd1	0.409281	-0.488793	1.02938	0.131307	0.494672	0.650666	1	0.714677
QTELEYpKEEK	1	Y2512	Q52KR3	Protein prune homolog 2 (BNIP2 motif-containing molecule at the C-terminal region 1)	Prune2 Bmcc1 Kiaa0367	0.445789	-0.500024	1.02423	0.07842	0.4975	0.67525	1	0.707184
RLYpCTPSpK	2	Y165,S169	Q62082-2	Myosin regulatory light chain 10	Myl10	0.307836	-0.501421	1.02375	0.214495	0.492472	0.622391	1	0.706525
ERSpQQAELCK	1	S123	O35160	Pituitary homeobox 3 (Homeobox protein PITX3) (Paired-like homeodomain transcription factor 3)	Pitx3	0.0936378	-0.450187	1.02297	0.479143	0.493841	0.526036	1	0.731974
DVYLSpPR	1	S205	A2AFI3	RNA binding motif protein, X chromosome, isoform CRA_b (RNA-binding motif protein, X chromosome)	Rbmx mCG_17339	0.629157	-0.496433	1.01961	-0.105981	0.501116	0.767093	1	0.712683
AEEDEILNRSpPR	1	S582	P35564	Calnexin	Canx	0.708783	-0.508621	1.01773	-0.199673	0.501174	0.8117	1	0.704615
SpSAPSpKSEDLGK	2	S355,S359	E9Q5F9	Histone-lysine N-methyltransferase SETD2 (EC 2.1.1.43) (Lysine N-methyltransferase 3A) (SET domain-containing protein 2)	Setd2 Kiaa1732 Kmt3a	1.94221	-0.512728	1.00888	-1.44606	0.275587	1	0.549288	0.392916
SQSSHSYpDDSpTLPLIDR	2	Y865,S868	D3Z2H2	Catenin delta-1	Ctnnd1	0.380669	-0.755896	1.0082	-0.128368	0.498023	0.661852	1	0.594634
ELSHSpPPR	1	S1182	Q8BTI8	Serine/arginine repetitive matrix protein 2	Srrm2 Kiaa0324	0.696784	-0.432294	1.00783	-0.121246	0.497811	0.819281	1	0.741119
RNSpEVAVMDK	1	S296	E9QJU8	Transformation-related protein 53-binding protein 2	Trp53bp2	-0.762553	-0.476778	1.00407	1.28985	0.50427	0.313533	1	0.724113
HHSpSGKK	1	S427	A2AF73	Protein Gm595	Gm595	0.955873	-1.01287	0.95303	-1.01572	0.415766	0.824632	0.823355	0.401689
DATIPVESpDTpDDEGAPR	2	S468,T470	Q99L48	60S ribosomal export protein NMD3	Nmd3	0.438214	-1.06079	0.94485	-0.554152	0.531143	0.703875	1	0.489953
AEGHSDEESpDSpEGSpDSpESSSR	4	S304,S306,S309,S311	A2AD84	Serine/threonine-protein kinase 26	Stk26 2610018G03Rik	1.58783	-0.987465	0.911257	-1.66404	0.335707	1	0.628766	0.319153
EEPEDVGMAPGEASpQGSDSpEGGAQGPASASR	2	S1193,S1198	Q6ZPJ3	E2/E3 hybrid ubiquitin-protein ligase UBE2O (EC 6.3.2.-) (EC 6.3.2.19) (Ubiquitin carrier protein O) (Ubiquitin-conjugating enzyme E2 O) (EC 6.3.2.19) (Ubiquitin-conjugating enzyme E2 of 230 kDa) (Ubiquitin-conjugating enzyme E2-230K) (Ubiquitin-protein ligase O)	Ube2o Kiaa1734	0.818172	-1.07046	0.884002	-1.00463	0.546084	0.915695	0.955417	0.469565
AYpEYTAIRR	1	Y523	Q8CFS6	Potassium voltage-gated channel subfamily V member 2 (Voltage-gated potassium channel subunit Kv8.2)	Kcnv2	-2.17837	-1.78289	0.879063	1.27455	0.572731	0.158688	1	0.301859
AGGAGGEGSDDDTSpLT	1	S289	E9PVP0	PCTP-like protein	Stard10	-1.26081	-0.957449	0.829229	1.13259	0.612875	0.236754	1	0.517423
EAPAGGSGDGLSpSPSpPLEYSPR	2	S1468,S1471	Q8CJ40	Rootletin (Ciliary rootlet coiled-coil protein)	Crocc Kiaa0445	-0.231972	-1.03399	0.782553	-0.0194687	0.606543	0.497	1	0.489494
RQSESpIAAPPVASEDMDK	1	S2396	B0V2P5	DmX-like protein 2	Dmxl2	0.178426	-1.25465	0.769669	-0.663405	0.655964	0.695333	0.953327	0.414675
LGETpSKEEWKR	1	T645	Q8BNE1	TRPM8 channel-associated factor 1 (TRP channel-associated factor 1)	Tcaf1 Fam115a Kiaa0738	0.295543	-0.954701	0.747925	-0.502319	0.597657	0.737984	1	0.528149
KVMESNCSpK	1	S108	E9QLE2	KAT8 regulatory NSL complex subunit 1-like protein	Kansl1l 1110028C15Rik	0.129338	-1.1191	0.734839	-0.513598	0.63416	0.657371	1	0.463014
RPSpGPENNQVAAGSHSQENGEQADPEAQEEEAK	1	S400	D3YTU2	Prolyl 3-hydroxylase OGFOD1	Ogfod1	-1.27761	-1.33093	0.732228	0.678906	0.630064	0.256137	1	0.39849
KPASVSPTTpPTpSPTEGEAS	2	T513,T515	Q8R1Q8	Cytoplasmic dynein 1 light intermediate chain 1 (Dynein light chain A) (DLC-A) (Dynein light intermediate chain 1, cytosolic)	Dync1li1 Dncli1 Dnclic1	-0.970542	-1.26301	0.716618	0.424153	0.579944	0.242433	0.71589	0.299492
EEPEDVGMAPGEASpQGSpDSEGGAQGPASASR	2	S1193,S1196	Q6ZPJ3	E2/E3 hybrid ubiquitin-protein ligase UBE2O (EC 6.3.2.-) (EC 6.3.2.19) (Ubiquitin carrier protein O) (Ubiquitin-conjugating enzyme E2 O) (EC 6.3.2.19) (Ubiquitin-conjugating enzyme E2 of 230 kDa) (Ubiquitin-conjugating enzyme E2-230K) (Ubiquitin-protein ligase O)	Ube2o Kiaa1734	0.756747	-1.07697	0.700126	-1.13359	0.629251	0.995215	0.95783	0.47045
TPDLSNQNSSDQANEEWETpASESSDFNER	1	T1471	Q3TLH4	Protein PRRC2C (BAT2 domain-containing protein 1) (HLA-B-associated transcript 2-like 2) (Proline-rich and coiled-coil-containing protein 2C)	Prrc2c Bat2d Bat2d1 Bat2l2 Kiaa1096	-0.25807	-1.01735	0.687744	-0.0715306	0.636436	0.544325	1	0.515686
DSDKEDGRESPSYDTpPSQR	1	S89	F8VQC9	Anion exchange protein	Slc4a7	1.32632	-1.04428	0.682715	-1.68789	0.386659	0.967307	0.691475	0.316728
LDDGHLNNSLGSpPVQADVYFPR	1	S25	E9QAC6	Galectin	Pick1	-0.928212	-1.05083	0.668109	0.545492	0.684145	0.355968	1	0.504847
QGDIGTpNWYAVLAGSpLDVK	2	T78,S87	Q9EQZ6	Rap guanine nucleotide exchange factor 4 (Exchange factor directly activated by cAMP 2) (Exchange protein directly activated by cAMP 2) (EPAC 2) (cAMP-dependent Rap1 guanine-nucleotide exchange factor) (cAMP-regulated guanine nucleotide exchange factor II) (cAMP-GEFII)	Rapgef4 Cgef2 Epac2	0.677389	-1.02028	0.663346	-1.03432	0.613343	0.962774	0.953852	0.471067
EINKSLLVLKNIVPQGLTpHMQKGLR	1	T150	Q8BVM2	Anthrax toxin receptor-like	Antxrl	-1.6081	-1.16487	0.659109	1.10234	0.644393	0.209105	0.860055	0.395138
KNFGGGNTpAWEEKTpLSK	2	T56,T62	Q9CYA0	Cysteine-rich with EGF-like domain protein 2	Creld2	1.73188	-0.95315	0.610404	-2.07462	0.303212	1	0.475074	0.238264
EKLKRSpSSpPR	2	S1873,S1875	A2ADB0	Msx2-interacting protein	Spen	-0.409204	-0.934139	0.559221	0.0342859	0.668563	0.437424	0.86597	0.453751
KDLTTpEEHK	1	T434	E9PWJ4	Protein Auts2	Auts2	0.649148	-1.16934	0.52641	-1.29208	0.641751	0.991305	0.914434	0.421959
LLPSSGPCVAEVSpTAEEPSPPSpTPTR	2	S1509,S1518	E9Q5W5	Zinc finger ZZ-type and EF-hand domain-containing protein 1	Zzef1	-0.0432212	-0.972917	0.481107	-0.448589	0.69935	0.613191	0.888393	0.460418
DVITLLYpIKLK	1	S524	E9PZ22	Maestro heat-like repeat family member 4	Mroh4 1700016M24Rik	-0.0237154	-1.20346	0.476712	-0.703028	0.686003	0.628433	0.860188	0.403122
VLDAYpGLLGVLR	1	Y60	D3Z1M7	Synaptojanin-1 (Fragment)	Synj1	0.719871	-0.993711	0.449649	-1.26393	0.565835	0.922979	0.790823	0.383444
AAEEAFVNDIDESpSPGTEWER	1	S192	B1AWE0	Clathrin light chain A	Clta	-0.448268	-1.5159	0.440717	-0.626914	0.612516	0.400246	0.707278	0.227691
AAEEAFVNDIDESSpPGTEWER	1	S193	B1AWE0	Clathrin light chain A	Clta	-0.448268	-1.5159	0.440717	-0.626914	0.612516	0.400246	0.707278	0.227691
EGEEPTVYSpDDEEPKDETAR	1	S181	O55022	Membrane-associated progesterone receptor component 1	Pgrmc1 Pgrmc	1.10633	-1.54173	0.409919	-2.23814	0.45102	0.959079	0.674827	0.210797
HGEETEEERSpYEGANGR	1	S408	P16014	Secretogranin-1 (Chromogranin-B) (CgB) (Secretogranin I) (SgI) [Cleaved into: CCB peptide; PE-11]	Chgb Scg-1 Scg1	-0.747757	2.06579	-0.402455	2.41109	0.322843	0.188546	0.241411	1
AAVLSDSEDDAGNASpAK	1	S353	Q8C1D8	Protein IWS1 homolog (IWS1-like protein)	Iws1 Iws1l	0.536871	1.06426	-0.469494	0.0578952	0.649475	0.941234	0.474768	0.978108
SGSNKSpSpYpEGHPLSEER	3	S300,S301,Y302	P16014	Secretogranin-1 (Chromogranin-B) (CgB) (Secretogranin I) (SgI) [Cleaved into: CCB peptide; PE-11]	Chgb Scg-1 Scg1	-0.0479303	2.15829	-0.519724	1.6865	0.391261	0.33929	0.225001	1
SQSPAASDCSpSSSSSASLPSSGR	1	S186	Q9JLV1	BAG family molecular chaperone regulator 3 (BAG-3) (Bcl-2-associated athanogene 3) (Bcl-2-binding protein Bis)	Bag3 Bis MNCb-2243	0.662921	1.5884	-0.528993	0.396486	0.505406	0.785679	0.333579	0.994979
HGEETEEERSpYpEGANGR	2	S408,Y409	P16014	Secretogranin-1 (Chromogranin-B) (CgB) (Secretogranin I) (SgI) [Cleaved into: CCB peptide; PE-11]	Chgb Scg-1 Scg1	-0.460429	2.30077	-0.542111	2.21909	0.350711	0.216157	0.205519	1
SGRLSQELDLVSpHK	1	S96	P81117	Nucleobindin-2 (DNA-binding protein NEFA) (Prepronesfatin) [Cleaved into: Nesfatin-1]	Nucb2 Nefa	0.212007	1.06856	-0.550174	0.306383	0.701305	0.808991	0.476852	1
TEEESETESEGSpVDPEELDSR	1	S528	Q8CHW4	Translation initiation factor eIF-2B subunit epsilon (eIF-2B GDP-GTP exchange factor subunit epsilon)	Eif2b5	1.06364	1.07727	-0.604668	-0.591043	0.541058	1	0.314769	0.668207
SpKPSpTGKR	2	S1075,S1078	A2AFF6	Cohesin subunit SA-2	Stag2	0.749394	1.05338	-0.619501	-0.315511	0.605838	0.992488	0.410202	0.818009
EEGTVGSGDSpSpEEGEEHSVK	2	S207,S208	Q8BLH7	HIRA-interacting protein 3	Hirip3	0.26258	1.28447	-0.643167	0.378721	0.64889	0.769716	0.42066	1
GDKSSEPTEDVETpK	1	T239	Q62313	Trans-Golgi network integral membrane protein 1 (TGN38A)	Tgoln1 Ttgn1	0.217785	1.68048	-0.674545	0.788151	0.512166	0.587171	0.311992	1
DQLSEDASpK	1	S310	Q03517	Secretogranin-2 (Chromogranin-C) (Secretogranin II) (SgII) [Cleaved into: Secretoneurin (SN); Manserin]	Scg2 Chgc Scg-2	-0.168811	1.59262	-0.718364	1.04307	0.548539	0.488983	0.331569	1
SGMSPEQSKTpK	1	T1007	Q8BTI8	Serine/arginine repetitive matrix protein 2	Srrm2 Kiaa0324	0.701011	1.11271	-0.726678	-0.314982	0.623895	1	0.373356	0.803924
SGSGSpGGASAK	1	S185	P83741	Serine/threonine-protein kinase WNK1 (EC 2.7.11.1) (Protein kinase lysine-deficient 1) (Protein kinase with no lysine 1)	Wnk1 Hsn2 Prkwnk1	0.54988	1.01729	-0.753744	-0.286329	0.685697	1	0.409672	0.820511
SpLGGLSpGSpRGGGGGGGGK	3	S5,S10,S12	D3YUQ5	Gene model 440, (NCBI) (RUN domain-containing protein 3B)	Rundc3b Gm440 mCG_123117	1.04193	1.65781	-0.77011	-0.154229	0.490255	1	0.293458	0.902203
EFLEPDSWETpLDQQQLFTEDELK	1	T335	P81117	Nucleobindin-2 (DNA-binding protein NEFA) (Prepronesfatin) [Cleaved into: Nesfatin-1]	Nucb2 Nefa	-1.39873	1.17472	-0.782613	1.79084	0.770824	0.449535	0.437008	0.966398
SQSPAASDCSSpSSSSASLPSSGR	1	S187	Q9JLV1	BAG family molecular chaperone regulator 3 (BAG-3) (Bcl-2-associated athanogene 3) (Bcl-2-binding protein Bis)	Bag3 Bis MNCb-2243	0.556367	1.76626	-0.891908	0.317983	0.557948	0.802571	0.293626	0.970189
SQEETDSpTpKEEAAK	2	S371,T372	P47867	Secretogranin-3 (Secretogranin III) (SgIII)	Scg3	0.173635	1.53764	-0.964059	0.399945	0.678378	0.785906	0.348029	1
DYPLASpK	1	S237	E0CXK0	Inosine-5'-monophosphate dehydrogenase 1 (Fragment)	Impdh1	-1.05965	1.35829	-0.965953	1.45198	0.762008	0.37492	0.392497	1
AMAEEDNGSIGEETDSpSPGRK	1	S667	P70302	Stromal interaction molecule 1	Stim1 Sim	0.862518	1.43773	-0.975543	-0.400327	0.520824	0.944398	0.263978	0.755124
NEKSEEEQSpSASVK	1	S246	Q9Z204	Heterogeneous nuclear ribonucleoproteins C1/C2 (hnRNP C1/C2)	Hnrnpc Hnrpc	1.22549	1.00642	-1.00239	-1.22147	0.429802	1	0.219107	0.463389
LFDYSpK	1	S203	Q99LC2	Cleavage stimulation factor subunit 1 (CF-1 50 kDa subunit) (Cleavage stimulation factor 50 kDa subunit) (CSTF 50 kDa subunit) (CstF-50)	Cstf1	0.143199	0.510409	-1.00281	-0.635602	0.905593	1	0.459822	0.664921
ESQSPDSpAK	1	S43	B2RXQ9	Sorbin and SH3 domain-containing protein 2 (Sorbs2 protein)	Sorbs2	0.411991	1.12091	-1.00351	-0.294584	0.716118	0.947207	0.354539	0.79727
FRDEVEDDYpIK	1	Y69	Q9ER58	Testican-2 (SPARC/osteonectin, CWCV, and Kazal-like domains proteoglycan 2)	Spock2 Ticn2	0.295365	1.45399	-1.02957	0.129057	0.745982	0.916183	0.365217	1
EQLWRRKVKTpSRENTpK	2	T1245,T1250	A2ADM8	Zinc finger protein 831	Zfp831	-2.47373	1.93122	-1.04918	3.35577	0.586299	0.101219	0.276129	1
TSSPETREPESpK	1	S1280	F8WJD4	Symplekin	Sympk	-0.218569	0.897396	-1.09303	0.0229352	0.978556	0.842789	0.460463	0.86488
VAVVRTPPKSpPSpASK	2	S527,S529	A2A5Y6	Microtubule-associated protein	Mapt	0.020153	1.05038	-1.09641	-0.0661774	0.942502	0.956562	0.440715	0.91654
KRMTYpQK	1	Y229	O35906	Transcription factor Spi-B	Spib	0.786577	0.588155	-1.10199	-1.30041	0.582228	1	0.273969	0.406228
RKSPENTpEGK	1	T10	Q9DCB1	High mobility group nucleosome-binding domain-containing protein 3	Hmgn3	0.532686	0.500945	-1.12186	-1.1536	0.691963	1	0.320786	0.452239
TVTPASSpAK	1	S518	O08553	Dihydropyrimidinase-related protein 2 (DRP-2) (Unc-33-like phosphoprotein 2) (ULIP-2)	Dpysl2 Crmp2 Ulip2	0.715019	0.829587	-1.13687	-1.0223	0.611389	1	0.277029	0.49264
NTVDLVNTHHLHSpSpSpDDEDDRLK	3	S529,S530,S531	Q7TSI3	Serine/threonine-protein phosphatase 6 regulatory subunit 1 (SAPS domain family member 1)	Ppp6r1 Kiaa1115 Pp6r1 Saps1	-2.05765	0.386146	-1.14373	1.30006	1	0.241178	0.452823	0.593307
KLEDQNEYpESRSLWK	1	Y663	A2A8Z1	Oxysterol-binding protein-related protein 9 (ORP-9) (OSBP-related protein 9)	Osbpl9 Orp9	-0.19584	0.421754	-1.14381	-0.526221	0.994832	0.877182	0.450355	0.617268
QQQQQQQQQQQQQQQEQLYpKMQHWQPVYpPPPSHPQR	2	Y658,Y667	F7AYW2	Protein PRRC2B (Fragment)	Prrc2b	-0.14983	1.03777	-1.16518	0.0224222	0.910864	0.833803	0.404935	0.830434
AEGHSDEESpDSpEGSpDSESSSR	3	S304,S306,S309	A2AD84	Serine/threonine-protein kinase 26	Stk26 2610018G03Rik	0.0592688	0.499376	-1.17653	-0.736419	0.937367	0.974821	0.413848	0.58532
RNESPGTSpEAQK	1	S1332	F8VQ87	5'-3' exoribonuclease 1	Xrn1	0.441399	0.399429	-1.19872	-1.24069	0.737724	1	0.320891	0.429466
EQLSEVEGSpGEDDQGDDHSESAQK	1	S680	P35123	Ubiquitin carboxyl-terminal hydrolase 4 (EC 3.4.19.12) (Deubiquitinating enzyme 4) (Ubiquitin thioesterase 4) (Ubiquitin-specific-processing protease 4) (Ubiquitous nuclear protein)	Usp4 Unp	0.553703	0.782039	-1.20428	-0.975943	0.682983	1	0.298202	0.50859
TAFYNEDDSpEEEQR	1	S1783	F8VQ93	PH-interacting protein	Phip	-1.9092	1.14923	-1.21062	1.8478	0.937465	0.249353	0.411776	0.901773
SGSEQSDNESVQSpGR	1	S1107	Q62018	RNA polymerase-associated protein CTR9 homolog (SH2 domain-binding protein 1) (Tetratricopeptide repeat-containing, SH2-binding phosphoprotein of 150 kDa) (TPR-containing, SH2-binding phosphoprotein of 150 kDa) (p150TSP)	Ctr9 Kiaa0155 Sh2bp1	0.914358	1.62349	-1.21192	-0.502789	0.509691	0.936823	0.234832	0.717569
QEESESpPVDRPLTpENPPNK	2	S311,T318	O70551	SRSF protein kinase 1 (EC 2.7.11.1) (SFRS protein kinase 1) (Serine/arginine-rich protein-specific kinase 1) (SR-protein-specific kinase 1)	Srpk1	0.713379	0.453766	-1.23039	-1.49	0.614779	1	0.261648	0.356108
TEASEALPSpEGK	1	S299	P26339	Chromogranin-A (CgA) [Cleaved into: Pancreastatin; Beta-granin; WE-14; Catestatin; GE-25; Serpinin-RRG; Serpinin (AL26); p-Glu serpinin precursor]	Chga	-0.18449	0.559458	-1.25994	-0.515989	1	0.881232	0.424127	0.62305
NTFTAWSpEEDSpDYEIDDRDVNK	2	S604,S608	J3QNB1	La-related protein 1 (La ribonucleoprotein domain family member 1)	Larp1 Kiaa0731 Larp	-1.13927	0.880966	-1.26197	0.758268	1	0.466953	0.417067	0.772586
SNSPVSpEKPDPTPAK	1	S632	A2A482	Protein Zmynd8	Zmynd8 Prkcbp1	0.317642	0.4047	-1.27112	-1.18406	0.809181	1	0.334942	0.441799
EMEAELNSTpMK	1	T72	E0CXF0	E2F-associated phosphoprotein	Eapp	0.872642	1.38182	-1.28368	-0.774501	0.546949	1	0.228453	0.609642
SRSPPSEEASpK	1	S257	Q8BP78	Protein FRA10AC1 homolog	Fra10ac1	0.397249	0.636883	-1.28958	-1.04995	0.759557	1	0.311083	0.486437
LGGDVSPTQIDVSpQFGSpFK	2	S1504,S1508	P14873	Microtubule-associated protein 1B (MAP-1B) (MAP1(X)) (MAP1.2) [Cleaved into: MAP1B heavy chain; MAP1 light chain LC1]	Map1b Mtap1b Mtap5	0.419553	0.616425	-1.29525	-1.09838	0.748265	1	0.305238	0.467441
WTpRDEDDK	1	T39	E9QLX9	Myb-related protein A	Mybl1	-0.0116631	0.423469	-1.31596	-0.880831	0.928752	0.921876	0.374904	0.517386
VAVVRTpPPKSpPSASK	2	T523,S527	A2A5Y6	Microtubule-associated protein	Mapt	-0.00544054	1.21661	-1.33773	-0.115685	0.948442	0.945072	0.374705	0.876995
TPSpPGEQQQVQEVK	1	S40	Q9CPS8	Small membrane A-kinase anchor protein (Small membrane AKAP) (smAKAP)	N/A	-0.603729	0.52163	-1.36724	-0.241875	1	0.65845	0.401354	0.576379
TVLESGGETpGDGDNDTTK	1	T485	Q9ESX5	H/ACA ribonucleoprotein complex subunit 4 (EC 5.4.99.-) (Dyskerin) (Nopp140-associated protein of 57 kDa) (Nucleolar protein NAP57) (Nucleolar protein family A member 4) (snoRNP protein DKC1)	Dkc1	-0.0944656	0.567925	-1.38835	-0.725961	1	0.938481	0.39413	0.566505
SRSpASpRSpPK	3	S503,S505,S507	Q6PFF0	Protein Scaf4 (Splicing factor, arginine/serine-rich 15)	Scaf4 Sfrs15 Srsf15	0.39278	0.696049	-1.39116	-1.0879	0.768093	1	0.293098	0.477723
RPECTpK	1	T481	P35546	Proto-oncogene tyrosine-protein kinase receptor Ret (EC 2.7.10.1) (Proto-oncogene c-Ret) [Cleaved into: Soluble RET kinase fragment; Extracellular cell-membrane anchored RET cadherin 120 kDa fragment]	Ret	-0.593645	1.01583	-1.39683	0.212651	1	0.671563	0.384962	0.788067
SSGSPSpNQK	1	S77	Q8BG34	UBX domain-containing protein 10 (UBX domain-containing protein 3)	Ubxn10 Ubxd3	0.815279	2.06651	-1.40242	-0.151187	0.559184	0.976086	0.2216	0.886066
IYHSpEER	1	S155	P16014	Secretogranin-1 (Chromogranin-B) (CgB) (Secretogranin I) (SgI) [Cleaved into: CCB peptide; PE-11]	Chgb Scg-1 Scg1	0.150913	0.644696	-1.47102	-0.977233	0.889629	0.980297	0.318502	0.499632
VAVVRTPPKSPSpASpK	2	S529,S531	A2A5Y6	Microtubule-associated protein	Mapt	-0.00256698	1.38822	-1.47141	-0.0806224	0.948923	0.948006	0.341998	0.900631
GGEDEDGSDEDVVHNEDIHFEPIVSpLPEVEVK	1	S2746	Q9ERU9	E3 SUMO-protein ligase RanBP2 (EC 6.3.2.-) (Ran-binding protein 2) (RanBP2)	Ranbp2	0.408259	0.551996	-1.47475	-1.33101	0.75355	1	0.273488	0.414934
EKKSpKKGR	1	S33	P33609	DNA polymerase alpha catalytic subunit (EC 2.7.7.7) (DNA polymerase alpha catalytic subunit p180)	Pola1 Pola	0.361698	0.488898	-1.48045	-1.35325	0.778464	1	0.282149	0.424424
RDTDSDTpQDANDSSCK	1	T718	B1AZP2	Disks large-associated protein 4 (DAP-4) (PSD-95/SAP90-binding protein 4) (SAP90/PSD-95-associated protein 4) (SAPAP-4)	Dlgap4 Kiaa0964 Sapap4	0.00180699	0.732779	-1.48402	-0.753048	0.988268	0.989493	0.353276	0.608095
LGGDVSPTpQIDVSpQFGSFK	2	T1499,S1504	P14873	Microtubule-associated protein 1B (MAP-1B) (MAP1(X)) (MAP1.2) [Cleaved into: MAP1B heavy chain; MAP1 light chain LC1]	Map1b Mtap1b Mtap5	0.334117	0.739681	-1.48679	-1.08123	0.79388	1	0.283575	0.473007
SWEDNQQGDEALDTpTK	1	T85	F6SLR4	Testican-2	Spock2	0.39849	0.918417	-1.50979	-0.989867	0.758652	1	0.266556	0.509478
DQQPSGSpEGEDDDAEAALK	1	S88	Q99J36	THUMP domain-containing protein 1	Thumpd1	0.127165	0.421023	-1.51346	-1.2196	0.853009	0.921062	0.295797	0.39441
QQGPPPAPANDSpDNEEDAPASSLK	1	S1436	E9QAF9	Protein TANC1	Tanc1	0.29877	0.616995	-1.53723	-1.219	0.814344	1	0.283633	0.435053
EQSPVSKTpK	1	T690	A2AR02	Peptidyl-prolyl cis-trans isomerase G (PPIase G) (Peptidyl-prolyl isomerase G) (EC 5.2.1.8) (Cyclophilin G) (Rotamase G)	Ppig	0.369659	1.12718	-1.55588	-0.798361	0.774719	1	0.266011	0.586057
QESDEDSDSDQPSpRK	1	S1089	Q62018	RNA polymerase-associated protein CTR9 homolog (SH2 domain-binding protein 1) (Tetratricopeptide repeat-containing, SH2-binding phosphoprotein of 150 kDa) (TPR-containing, SH2-binding phosphoprotein of 150 kDa) (p150TSP)	Ctr9 Kiaa0155 Sh2bp1	-0.18971	0.585664	-1.63715	-0.861772	1	0.876877	0.322166	0.54679
TGSVQTSPSSTpPGTGR	1	T1099	D9HP81	Regulating synaptic membrane exocytosis 2 (Regulating synaptic membrane exocytosis protein 2)	Rims2	0.17769	0.714441	-1.65511	-1.11836	0.888957	0.997602	0.281178	0.460741
ELYpSEILDK	1	Y115	Q9D1B9	39S ribosomal protein L28, mitochondrial (L28mt) (MRP-L28)	Mrpl28	-0.867776	1.07747	-1.68647	0.258774	1	0.548075	0.31283	0.681442
AEDQELESpLSpAIEAELEK	2	S442,S444	P26339	Chromogranin-A (CgA) [Cleaved into: Pancreastatin; Beta-granin; WE-14; Catestatin; GE-25; Serpinin-RRG; Serpinin (AL26); p-Glu serpinin precursor]	Chga	-0.732695	1.2894	-1.69964	0.322456	0.938091	0.658649	0.302278	0.747674
ENNVSQPASSSSSSpSSSNNGSSSPTKTK	1	S125	K4DI62	Transcription factor Sp4	Sp4	0.282356	0.500937	-1.71649	-1.49791	0.822297	1	0.250309	0.35823
ASQDTEDEESGASGSpDSGSPAR	1	S23	Q8K3W3	Protein CASC3 (Cancer susceptibility candidate gene 3 protein homolog) (Metastatic lymph node gene 51 protein homolog) (MLN 51 homolog) (Protein barentsz) (Btz) (mBtz)	Casc3 Mln51	1.098	0.43322	-1.73617	-2.40095	0.489643	1	0.140508	0.244293
ITQNNAMKISpFAK	1	S283	Q62189	U1 small nuclear ribonucleoprotein A (U1 snRNP A) (U1-A) (U1A)	Snrpa Rnu1a-1	-0.224189	0.404421	-1.75902	-1.13041	1	0.856135	0.302485	0.444907
EVEEDSEDEEMSEDEDDSSpGEEEVVIPQK	1	S41	P09405	Nucleolin (Protein C23)	Ncl Nuc	-0.640152	0.389694	-1.76564	-0.735792	1	0.656351	0.316845	0.407874
DLQGNPIANATISVDGIDHDVTSAKDGDYWRLLAPGNYpK	1	Y419	Q00493	Carboxypeptidase E (CPE) (EC 3.4.17.10) (Carboxypeptidase H) (CPH) (Enkephalin convertase) (Prohormone-processing carboxypeptidase)	Cpe	0.687049	1.52867	-1.78801	-0.946388	0.621238	1	0.181134	0.543812
SLDSDESpEDEDDDYpQQK	2	S63,Y70	Q3UHX2	28 kDa heat- and acid-stable phosphoprotein (PDGF-associated protein) (PAP) (PDGFA-associated protein 1) (PAP1)	Pdap1	-1.02532	1.26419	-1.80703	0.482476	1	0.602573	0.33909	0.718661
SQEETDSTpK	1	T372	P47867	Secretogranin-3 (Secretogranin III) (SgIII)	Scg3	0.188466	0.65537	-1.82203	-1.35513	0.884384	1	0.248745	0.390923
SAEDLTDGSYpDDILNAEQLK	1	Y52	D3Z5T2	Armadillo repeat-containing protein 10	Armc10	0.37212	1.33559	-1.8496	-0.886132	0.772713	1	0.216204	0.564347
RPDYAPMESpSpDEEDEEFQFIK	2	S52,S53	Q9CQU1	Microfibrillar-associated protein 1	Mfap1	-0.375327	1.36959	-1.85967	-0.11475	0.871999	0.724221	0.239464	0.691245
TGTGSPFAGNSpPAREGEQDAGSpLK	2	S1276,S1287	E9Q8K8	Zinc finger CCCH domain-containing protein 4	Zc3h4	-1.23554	1.06237	-1.86423	0.433684	1	0.453293	0.292158	0.628508
SRSpRSpRSpPPPVSK	3	S187,S189,S191	Q62093	Serine/arginine-rich splicing factor 2 (Protein PR264) (Putative myelin regulatory factor 1) (MRF-1) (Splicing component, 35 kDa) (Splicing factor SC35) (SC-35) (Splicing factor, arginine/serine-rich 2)	Srsf2 Pr264 Sfrs10 Sfrs2	-0.519499	0.900779	-1.8852	-0.464919	0.962627	0.725144	0.287237	0.596354
KESESpEDSpSpDDEPLIK	3	S308,S311,S312	Q7TNV0	Protein DEK	Dek	0.201981	1.43571	-1.90345	-0.669716	0.849285	0.967285	0.226219	0.68466
WTEGGGHSREGVDDQESpLRPSNQQASK	1	S138	P16014	Secretogranin-1 (Chromogranin-B) (CgB) (Secretogranin I) (SgI) [Cleaved into: CCB peptide; PE-11]	Chgb Scg-1 Scg1	-0.561001	1.26768	-1.91139	-0.0827078	1	0.701458	0.265927	0.680844
WTEGGGHSREGVDDQESLRPSpNQQASK	1	S142	P16014	Secretogranin-1 (Chromogranin-B) (CgB) (Secretogranin I) (SgI) [Cleaved into: CCB peptide; PE-11]	Chgb Scg-1 Scg1	-0.601878	1.34042	-1.91204	0.0302575	0.997267	0.687044	0.266281	0.725133
DEDGESpGPDEGPDLEESSAGYK	1	S600	A2AWS5	Histone deacetylase 5	Hdac5	-1.67717	0.630535	-1.9147	0.392998	1	0.329929	0.265907	0.4114
EATESpRHK	1	S336	Q8BHN1	Gamma-taxilin (Factor inhibiting ATF4-mediated transcription) (FIAT) (Lipopolysaccharide-responsive gene protein)	Txlng Lrg	-1.6509	0.725634	-1.93117	0.445365	1	0.364665	0.262638	0.451341
EYETLEEITpDPLK	1	T51	D3YYK3	Caspase recruitment domain family, member 6 (Fragment)	Card6	-0.357316	1.35273	-1.93418	-0.224132	1	0.78779	0.263597	0.669134
GGSpSpGEELEDEEPVK	2	S366,S367	Q3UMU9	Hepatoma-derived growth factor-related protein 2 (HRP-2)	Hdgfrp2	-0.385462	0.54482	-1.94824	-1.01796	1	0.785598	0.28925	0.38692
EDAGAPVEDSQGQTpK	1	T115	P16014	Secretogranin-1 (Chromogranin-B) (CgB) (Secretogranin I) (SgI) [Cleaved into: CCB peptide; PE-11]	Chgb Scg-1 Scg1	-0.152993	1.60515	-1.95825	-0.200108	1	0.902349	0.258698	0.796128
HLTpEEKPDGLVNEATpR	2	T177,T189	Q8VEH6	COBW domain-containing protein 1 (Cobalamin synthase W domain-containing protein 1)	Cbwd1	-0.681969	0.497373	-1.97601	-0.796674	1	0.659474	0.318095	0.480535
ENSpPSVSpPTANITAPFGLK	2	S518,S522	P62046	Leucine-rich repeat and calponin homology domain-containing protein 1 (Calponin homology domain-containing protein 1)	Lrch1 Chdc1 Kiaa1016	-2.62518	0.666932	-2.01476	1.27735	1	0.162984	0.247847	0.405901
NTFTAWSEEDSpDYpEIDDRDVNK	2	S608,Y610	J3QNB1	La-related protein 1 (La ribonucleoprotein domain family member 1)	Larp1 Kiaa0731 Larp	-1.43588	1.44382	-2.0515	0.828196	1	0.388498	0.241372	0.662501
SpQEETDSTK	1	S365	P47867	Secretogranin-3 (Secretogranin III) (SgIII)	Scg3	0.445356	0.933149	-2.08718	-1.59939	0.748427	1	0.175	0.332015
RADEWKDPWRRSpKSpPK	2	S518,S520	G3X8T2	RIKEN cDNA 5830416A07, isoform CRA_c (Zinc finger CCCH domain-containing protein 18)	Zc3h18 5830416A07Rik mCG_1040504	0.0278553	0.587475	-2.12076	-1.56114	0.905008	0.920954	0.207431	0.394184
QQQQQQQQQQQEQQHSSFEDELSpEVFENQSPDAK	1	S125	P26339	Chromogranin-A (CgA) [Cleaved into: Pancreastatin; Beta-granin; WE-14; Catestatin; GE-25; Serpinin-RRG; Serpinin (AL26); p-Glu serpinin precursor]	Chga	-1.19637	1.57903	-2.14237	0.633032	1	0.475626	0.22661	0.683547
HNQGDSpDDDVEEAHPMDGNDSpDYDPKK	2	S212,S227	Q6PGA0	REST corepressor 3	Rcor3	-0.274274	0.487432	-2.1854	-1.42369	1	0.833663	0.222897	0.308629
WASSpREDAGAPVEDSQGQTK	1	S100	P16014	Secretogranin-1 (Chromogranin-B) (CgB) (Secretogranin I) (SgI) [Cleaved into: CCB peptide; PE-11]	Chgb Scg-1 Scg1	-0.515766	1.98149	-2.2277	0.269555	0.904153	0.640475	0.192331	0.787284
ELEPITTSpQALQIAGRAGRFSSpHFK	2	S462,S476	Q80YD1	ATP-dependent RNA helicase SUPV3L1, mitochondrial (EC 3.6.4.13) (Suppressor of var1 3-like protein 1) (SUV3-like protein 1)	Supv3l1 Suv3l1	-1.27209	1.15342	-2.23584	0.189669	1	0.541234	0.212298	0.524513
LSKSpGSEDEMK		S580	P52194	Calmegin (A2/6) (Calnexin-T) (MEG 1 antigen)	Clgn Meg1	-1.06982	0.390297	-2.23606	-0.775942	1	0.545951	0.261307	0.312394
QQQQQQQQQQQEQQHSSpFEDELSpEVFENQSpPDAK	3	S119,S125,S132	P26339	Chromogranin-A (CgA) [Cleaved into: Pancreastatin; Beta-granin; WE-14; Catestatin; GE-25; Serpinin-RRG; Serpinin (AL26); p-Glu serpinin precursor]	Chga	-1.96605	0.710121	-2.36882	0.307352	1	0.277837	0.196352	0.352465
ELEPITTSpQALQIAGRAGRFSpSHFK	2	S462,S475	Q80YD1	ATP-dependent RNA helicase SUPV3L1, mitochondrial (EC 3.6.4.13) (Suppressor of var1 3-like protein 1) (SUV3-like protein 1)	Supv3l1 Suv3l1	-1.25315	1.20799	-2.36978	0.0913587	1	0.552395	0.195165	0.504862
WTEGGGHSpREGVDDQESLRPSNQQASK	1	S129	P16014	Secretogranin-1 (Chromogranin-B) (CgB) (Secretogranin I) (SgI) [Cleaved into: CCB peptide; PE-11]	Chgb Scg-1 Scg1	-0.592112	1.86768	-2.53688	-0.0770855	1	0.696133	0.174349	0.688075
QQQQQQQQQQQEQQHSSpFEDELSEVFENQSPDAK	1	S119	P26339	Chromogranin-A (CgA) [Cleaved into: Pancreastatin; Beta-granin; WE-14; Catestatin; GE-25; Serpinin-RRG; Serpinin (AL26); p-Glu serpinin precursor]	Chga	-1.25188	1.57475	-2.61294	0.21369	1	0.469339	0.16609	0.487433
WASSREDAGAPVEDSpQGQTK	1	S111	P16014	Secretogranin-1 (Chromogranin-B) (CgB) (Secretogranin I) (SgI) [Cleaved into: CCB peptide; PE-11]	Chgb Scg-1 Scg1	-0.449268	2.23127	-2.69482	-0.0142822	0.97256	0.719589	0.151026	0.748526
DQQPSpGSpEGEDDDAEAALK	2	S86,S88	Q99J36	THUMP domain-containing protein 1	Thumpd1	-0.359368	0.620817	-2.728	-1.74782	0.96257	0.781071	0.163783	0.248361
HAEGTpFTpSDVSSYLEGQAAK	2	T102,T104	A2AS86	Glucagon (Fragment)	Gcg	-2.05101	0.774272	-2.91007	-0.084781	1	0.362015	0.136178	0.249904
QQQQQQQQQQQEQQHSpSFEDELSEVFENQSPDAK	1	S118	P26339	Chromogranin-A (CgA) [Cleaved into: Pancreastatin; Beta-granin; WE-14; Catestatin; GE-25; Serpinin-RRG; Serpinin (AL26); p-Glu serpinin precursor]	Chga	-1.25391	1.21784	-2.92509	-0.453334	1	0.476534	0.140466	0.323257
DGSpPDAPATpPEKEEVAFSEYK	2	S1352,T1358	P20357	Methionine aminopeptidase 2 (MAP 2) (MetAP 2) (EC 3.4.11.18) (Initiation factor 2-associated 67 kDa glycoprotein) (p67) (p67eIF2) (Peptidase M)	Metap2 Mnpep P67eif2	-2.36049	1.09246	-3.16298	0.289978	1	0.232763	0.113224	0.239267
QQQQQQQQQQQEQQHSSpFEDELSEVFENQSPDAKHR	1	S119	P26339	Chromogranin-A (CgA) [Cleaved into: Pancreastatin; Beta-granin; WE-14; Catestatin; GE-25; Serpinin-RRG; Serpinin (AL26); p-Glu serpinin precursor]	Chga	-1.22422	1.5833	-3.6537	-0.846188	1	0.485827	0.0922228	0.273908
QQQQQQQQQQQEQQHSpSFEDELSEVFENQSPDAKHR	1	S118	P26339	Chromogranin-A (CgA) [Cleaved into: Pancreastatin; Beta-granin; WE-14; Catestatin; GE-25; Serpinin-RRG; Serpinin (AL26); p-Glu serpinin precursor]	Chga	-1.22422	1.5833	-3.6537	-0.846188	1	0.485827	0.0922228	0.273908
FHEVGTEMIITpK	1	T77	P70326	T-box transcription factor TBX5 (T-box protein 5)	Tbx5	-3.16611	0.604455	-4.234	-0.463431	1	0.127738	0.0573681	0.0817776
PILEKTSpMK	1	S66	P0C0P8	Neuropeptide S	Nps	-1.70558	0.979627	-5.81449	-3.12928	1	0.309769	0.0221747	0.0368982
SpSpTpKKKK	3	S566,S567,T568	A2APD7	Nucleolar protein 56 (Fragment)	Nop56	0.276927	6.10049	-6.10113	-0.277576	0.789054	0.924332	0.306341	0.761643
